# Supplementary material for: 2016 Annual Report of the ABPN
Source: Atypon-hosted journal article supplement (doi:10.1176/appi.ajp.2017.174804), 2017-08-01
Supplement: appi.ajp.2017.174804.ds001.pdf [file appi.ajp.2017.174804.ds001.pdf]

**AP Certification, April 18, 2016**

Mark Joseph Albanese, M.D., Winchester, MA  
M Kaleem Arshad, M.D., HARVEY, LA  
Michelle Bauer, M.D., Salt Lake City, UT  
Navjyot Singh Bedi, M.D., Tucker, GA  
Howard Lawrence Burley Jr., M.D., Nashville, TN  
Jennifer Lian Casarella, M.D., Atlanta, GA  
Juan Raul Condemarin, M.D., Brighton, MA  
Eduardo Alfredo Constantino, M.D., East Setauket, NY  
Elizabeth Cookson, M.D., Denver, CO  
Sheila Ann Cooperman, M.D., Scarsdale, NY  
Jocelyn Smith Cox, M.D., Atlanta, GA  
Terry Alan Davis, M.D., J.D., Omaha, NE  
Mary Margaret Desch, M.D., Portland, OR  
Mario Finkelstein, M.D., Tenafly, NJ  
Maria Fernanda Gomez, M.D., Englewood Cliffs, NJ  
Shelly Faith Greenfield, M.D., M.P.H., Belmont, MA  
Melissa Faith Gross, M.D., Suffolk, VA  
John David Hall, M.D., charlotte, NC  
Vivian Kafantaris, M.D., Great Neck, NY  
Umamaheswara Rao Kalapatapu, M.D., Logansport, IN  
Kyle Matthew Kampman, M.D., Philadelphia, PA  
Ethan Ben Kass, D.O., M.B.A., Coral Springs, FL  
Mark Leonard Katz, M.D., Irvine, CA  
Ashok Issardas Khushalani, M.D., Humble, TX  
Steven Michael Kory, M.D., Joplin, MO  
Jesus Angel Lago, M.D., Purchase, NY  
Martin H. Leamon, M.D., Davis, CA

David Charles Lott, M.D., Naperville, IL  
Robert Sacks Martin, M.D., Santa Monica, CA  
Draupathi Easwaran Nambudiri, M.D., Rye Brook, NY  
Mary Alice O'Dowd, M.D., New York, NY  
Maria Patrascu, M.D., Farmington, CT  
Eduardo Ignacio Pena, M.D., West Palm Beach, FL  
Jeffrey Lee Peters, M.D., China Spring, TX  
Martha Praught, M.D., Dedham, MA  
Teresa Purdy, M.D., Durham, NC  
Margaret Ruyle Rukstalis, M.D., Winston Salem, NC  
Teresita Sanjurjo, M.D., Brandon, FL  
Mary Ellen Savage, M.D., New Haven, CT  
Jeffrey Bernhard Sawyer, M.D., St. Louis Park, MN  
Andrew John Saxon, M.D., Seattle, WA  
James Morton Schuster, M.D., Pittsburgh, PA  
Charles Henry Silberstein, M.D., West Tisbury, MA  
Seth Warren Silverman, M.D., P.A., Houston, TX  
Kevin Lawrence Sloan, M.D., Mercer Island, WA  
Kathleen Marie Stack, M.D., Fort Eustis, VA  
Walter Lester Standridge, M.D., Wheat Ridge, CO  
Christopher Michael Stewart, M.D., Oak Park, IL  
Susan Marie Stine, M.D., Grosse Pointe Park, MI  
Denise Szczucki, M.D., White Plains, NY  
Rosa I. Vargas-Soto, M.D., Trujillo Alto, PR  
Amy Elizabeth Wallace, M.D., MPH, Lyme, NH  
Jeffery N. Wilkins, M.D., Raleigh, NC  
Gihyun Yoon, M.D., West Haven, CT  
Thomas Myong Yun, M.D., Lilburn, GA  
Douglas Michael Ziedonis, M.D., Worcester, MA

**AP Certification, October 17, 2016**

Muhammad Ali Abbas, M.D., Howell, NJ  
Jonathan Adelstein, M.D., Seattle, WA  
Adeniyi S. Alatise, M.D., Chesapeake, VA  
Osama Ali, M.D., Georgetown, KY  
Tiffany N Andry, M.D., Birmingham, AL  
Mohammad Imran Anjum, M.D., Milwaukee, WI  
Ara Anspikian, M.D., Redlands, CA  
Lemuel Perez Arriola, M.D., Waseca, MN  
Michael Sam Ascher, M.D., Bala Cynwyd, PA  
Shaweta Babbar, M.B.B.S., Denver, CO  
David Do-young Bae, M.D., Meriden, NH  
Mildred C Barnett, M.D., New Port Richey, FL  
Alla Victorovna Baskakova, M.D., Cincinnati, OH  
Yusra Benhalim, M.D., San Antonio, TX  
Lori Bennett-Penn, M.D., New York, NY  
Hemanth Kumar Bhimasani, M.D., State College, PA  
Stephen Ronald Douglas Bo Brackett, M.D., Birmingham, AL  
Christina Ann Brezing, M.D., New York, NY  
Kimberly Michele Brown, MD, Los Angeles, CA  
Kevin LaNeal Buford, M.D., Apo, AE  
Raymond William Bunch, M.D., Phoenix, AZ  
Douglas Michael Burgess, M.D., Parkville, MO  
Richard Ducusin Camacho, MD, Scottsdale, AZ  
Ulas Mehmet Camsari, M.D., Rochester, MN  
Noah Capurso, M.D., New Haven, CT  
Srikanth Challagundla, M.D., Levittown, NY  
Joy Chang, M.D., Bethesda, MD

Lindsay Marie Chapman, D.O., Frisco, TX

Meadow Bifen Chen, M.D., Farmington, CT

Siu Ping Chin Feman, M.D., Cambridge, MA

Paul S Chung, M.D., Fullerton, CA

Michael Colin, M.D., Brooklyn, NY

Ishani H Dalal, D.O., Chicago, IL

Irena Danczik, M.D., Fort Collins, CO

Smita Das, M.D., Mountain View, CA

Arnab Datta, M.D., New York, NY

Jawad Daud, M.D., Parkland, FL

Akiva Daum, M.D., Boca Raton, FL

Michelle Davids, DO, Des Moines, IA

Michael A Dekker, D.O., Tucson, AZ

Adriane Melissa dela Cruz, M.D., Dallas, TX

Ross Stanley DeLeonardo Jr., M.D., New Orleans, LA

Adam Demner, M.D., New York, NY

Evelyn A. Dennison, M.D., Seattle, WA

Emily J Deringer, M.D., New York, NY

Sarah Domb, M.D., Pasadena, CA

Stephen Christopher Dudley, M.D., Douglasville, GA

Andres A. Eboli, M.D., East Walpole, MA

Saria Mounir El Haddad, M.D., Medford, MA

Elizabeth Anne Evans, M.D., New York, NY

Monica Faria, M.D., Scottsdale, AZ

John Victor I. Fermo, M.D., Houston, TX

Aikaterini Fineti, M.D., Stratford, CT

Bellelizabeth Foster, M.D., Albuquerque, NM

Amanda Beth Gabrielson, M.D., Minneapolis, MN

Megan Catherine Gary, M.D., Bothell, WA

Gibson George, M.B.B.S., Warrington, PA  
Deepali Gangahar Gershan, M.D., Chicago, IL  
Jesus Manuel Gil Gutierrez, M.D., Wesley Chapel, FL  
Akashdeep Gill, M.D., Los Angeles, CA  
Elihu Godshalk, M.D., Cincinnati, OH  
Anupriya Gogne, M.B.B.S., Cranston, RI  
Matthew A Goldenberg, D.O., Santa Monica, CA  
Viral Goradia, M.B.B.S., Liverpool, NY  
Leona Jean Graham, M.D., Dothan, AL  
Beth Grunschel, M.D., Trumbull, CT  
Nishanie Gunawardane, D.O., Bloomington, IN  
Rahul Gupta, M.D., Atlanta, GA  
Shaojie Han, M.D., Sugar Land, TX  
Ryan Matthew Hardman, MD, Salt Lake City, UT  
Sameer Hassamal, M.D., LaVerne, CA  
James Matthew Haug, M.D., Denver, CO  
Janella Hong, M.D., Walnut Creek, CA  
Bryan Hopping, D.O., MONTAUK, NY  
Daniel Hosta, M.D., Loveland, OH  
Ruth Marie Huhn, M.D., Denver, CO  
Jessica Hutto, M.D., Plano, TX  
Toai Thanh Huynh, M.D., West Hollywood, CA  
Theddeus Iheanacho, M.D., Orange, CT  
Joseph Insler, M.D., Westwood, MA  
Oleg Isakov, M.D., Forest Hills, NY  
Ashraf Ismail, M.D., Irvine, CA  
Imran Ahmed Jamil, M.D., Jersey City, NJ  
Hussam Aldeen Jefee Bahloul, M.D., Watertown, MA  
Anish John, M.D., Chicago, IL

Monique Jones, M.D., Beaverton, OR  
Lantie Elisabeth Jorandby, M.D., Reston, VA  
Ayana Jordan, M.D., New Haven, CT  
Anwarul Karim, M.D., Jamesville, NY  
Jyothsna Karlapalem, M.D., Tarrytown, NY  
SueAnn Kim, M.D., Dover, MA  
Eugene Kimn, M.D., Los Angeles, CA  
Kira Marie Krivy, D.O., Wexford, PA  
Nihit Kumar, M.B.B.S., Little Rock, AR  
Woo-Jin Kwak, D.O., Johns Creek, GA  
Grace Eun Kwon, D.O., Cowan Heights, CA  
Daniel Jonathan Lache, M.D., Morton, PA  
Neelofar Lalani, M.D., Oklahoma City, OK  
Jaakko Arto Lappalainen, M.D., Wilmington, DE  
Christoffel Erasmus Le Roux, M.D., Tucker, GA  
Martha Anne Lederer, M.D., Houston, TX  
Brian Craig Lerner, M.D., Owings Mills, MD  
Adam Ligas, M.D., Sewickley, PA  
Sean Xiao Luo, M.D., New York, NY  
John Maurice Mahan, M.D., Ashland, OR  
Srinagesh Mannekote Thippaiah, M.B.B.S., New Hyde Park, NY  
Dana Marlowe, M.D., Highland, IN  
Sarah Masoodsinaki, M.D., New York, NY  
Teofilo Enrique Matos Santana, M.D., New Haven, CT  
Darrick May, M.D., Baltimore, MD  
Jennifer Marie McDonald, M.D., Madison, WI  
Adam David Miller, M.D., Hudsonville, MI  
Andrew Gregory Mitton, MD, Los Angeles, CA  
Hammad Mohsin, M.B.B.S., Commack, NY

Alisha Moreland, M.D., Portland, OR  
Ravi Nahata, M.D., Little Rock, AR  
Daniel Patrick Notzon, M.D., Emeryville, CA  
Ewere Onyero Osian-Dugan, M.D., Baltimore, MD  
Enrique I. Oviedo, M.D., Baltimore, MD  
Thomas Soon Park, M.D., Ann Arbor, MI  
Rajesh Manharbhai Patel, M.D., Wayne, NJ  
Stephanie Lee Peglow, M.D., Stamford, CT  
Cristian Penciu, M.D., Danbury, CT  
Tiffany Ann Pendleton, D.O., Albuquerque, NM  
Curtis Phillips, M.D., Richland, WA  
Nicholas Karol Piotrowski, M.D., Lafayette, IN  
Caridad Ponce Martinez, M.D., Waltham, MA  
Ernest Rasyidi, M.D., Irvine, CA  
David Frederick Redinger, M.D., Louisville, KY  
Nicholas Peter Reeves, M.D., Richmond, CA  
Kristen Jonelle Reid, M.D., Sacramento, CA  
Shafqat Rizvi, M.D., Southlake, TX  
Claudia Patricia Rodriguez, M.D., Brookline, MA  
Wesley Ryan, M.D., Venice, CA  
Ayesha Sajid, M.B.B.S., CARMEL, IN  
Stanley Samuel, M.D., Brooklyn, NY  
Pernilla Schweitzer, M.D., San Francisco, CA  
Bikash Sharma, M.D., Ellicott City, MD  
Mardoche Sidor, M.D., Astoria, NY  
Jessica Mae Silberlicht, M.D., New York, NY  
George Nick Silvers, M.D., Miami Beach, FL  
Shirshendu Sinha, M.B.B.S., Mankato, MN  
Maryn Sloane, M.D., Whitestone, NY

Lee Samuel Spencer, M.D., Dallas, TX

Jon David Stiffler, M.D., New York, NY

Michael Ming Hui Tang, D.O., M.P.H., San Francisco, CA

Yilang Tang, M.D., Tucker, GA

Mandrill Taylor, M.D., Tigard, OR

Ravi Kumar Telakapalli, M.D., Alpharetta, GA

Mona Thapa, M.B.B.S., Centreville, VA

Jeremy Easton Thueson, M.D., Salt Lake City, UT

Nuria J Thusius, M.D., Rochester, MN

Elizabeth Marie Tiffany, M.D., Vancouver, WA

Peter Emmanuel O. Turkson, D.O., Cleveland Heights, OH

Mary Elizabeth Turner, M.D., Portland, OR

Allison Kay Ungar, M.D., Brooklyn, NY

Shri Kant Vaish, M.D., Lexington, KY

Sari Jaclyn Waisbren, M.D., New York, NY

Justine Wittenauer Welsh, M.D., Medina, OH

Ricardo Jermaine Whyte, M.D., Redlands, CA

David Matthew Willey, M.D., Leawood, KS

Arthur Robin Williams IV, M.D., New York, NY

William Wright, M.D., Waxhaw, NC

Lynn Yen, M.D., Torrance, CA

Tauheed Zaman, M.D., San Francisco, CA

Jarred Cory Zucker, M.D., Brooklyn, NY

**AP Maintenance of Certification, July 1, 2016**

Pradipkumar S. Desai, M.D., Lake Forest, IL

Juliana Melody Fort, M.D., Shreveport, LA

Peggy Sue Stephens, M.D., Sellersburg, IN

**CAP Certification 2016**



Harmony Raylen Abejuela, M.D., Braintree, MA  
Augustine Osondu Adiboshi, M.D., Davie, FL  
Kapil Kiran Aedma, M.D., Kansas City, KS  
Pratibha Agarwal, M.D., Springfield, MO  
Arpit Aggarwal, M.B.B.S., Columbia, MO  
Ramsey B. Ahmed, M.D., Masury, OH  
Vasudha Ahuja, M.D., Valencia, CA  
Yetunde O Akins, M.D., Klamath Falls, OR  
Venu Gopal Alapati, M.B.B.S., Indianapolis, IN  
Narmin Aliji, M.D., Yoruba Linda, CA  
Huda Yahya Alyahyaw, M.D., Arlington, VA  
Lance Amols, M.D., Coral Springs, FL  
Vivek Anand, M.D., Winterville, NC  
Tasheitha Anazia, M.D., Hattiesburg, MS  
Emaya Anbalagan, MD, Santa Clara, CA  
Claire Elizabeth Andersen, M.D., Salt Lake City, UT  
Benjamin Angarita, M.D., New York, NY  
Eric Rolando Arzubi, M.D., Billings, MT  
Ramiz Audi, M.D., Norfolk, VA  
Ronke L. Babalola, M.D., Milltown, NJ  
Hasani Kigos Baharanyi, M.D., Decatur, GA  
Anjam Bahl, M.D., Marina Del Rey, CA  
Priyadarshan Bajpayi, M.D., Copiague, NY  
Lauren Saleeby Barron, M.D., Columbia, SC  
Marie Lee Beasley, D.O., Chattanooga, TN  
James Bedford, M.D., Chapel Hill, NC  
Erin Fraser Benesch, D.O., Garden Grove, CA  
Margaret McCullough Benningfield, M.D., Nashville, TN

Anna Fay Berg, M.D., Glendale, WI  
Elsie Yamile Bermudez Pouchard, M.D., El Paso, TX  
Julie N Bernstein, D.O., Daphne, AL  
Sanaa Bhatti, M.D., New York, NY  
Xenia Johnson Bhembe, M.D., Milton, MA  
Amy Bissada, D.O., East Meadow, NY  
Zoe Blacksin, M.D., New York, NY  
James Bodnia, D.O., Edina, MN  
Ramnarine Boodoo, M.B.B.S., Hillside, NJ  
Ben Lare Boswell, M.D., Philadelphia, PA  
Sarah A. Bougary, M.B.B.S., Makkah, Al Nuzha Dist, n/a  
Ann M Bowden, M.D., Sioux Falls, SD  
Andrea Brownridge, M.D., Oviedo, FL  
Christopher John Brubaker, M.D., Seattle, WA  
Paul Abbott Bryant, M.D., New Haven, CT  
Jing Bu, M.D., Tampa, FL  
Jason Richard Burns, M.D., Wauwatosa, WI  
Christopher Burritt, D.O., Devon, PA  
Pedro Manuel Bustamante IV, M.D., Houston, TX  
Thomas Nordling Butler, M.D., San Francisco, CA  
Angela Byron, D.O., London, OH  
Zuraima Taili Caldera, M.B.Ch.B., Round Rock, TX  
Richard Callahan, M.D., Holmdel, NJ  
Andrene Alicia Campbell, M.D., Mahopac, NY  
Amelia Marie Oliva Campos, M.D., Corbin, KY  
Ali Nelson Canton Vafabakhsh, M.D., Ocala, FL  
Andrea Carter, M.D., Lancaster, CA  
Iverson Brooks Carter, M.D., Winston Salem, NC  
Krystine D Carter, M.D., Marlton, NJ

Robin Casey, M.D., Chapel Hill, NC  
Lauren Cashion, M.D., Annapolis, MD  
Catherine Cashman, D.O., Rochester, NY  
Hong Chai, M.B.B.S., Houston, TX  
Nicholas Yik-Fung Chan, M.D., San Diego, CA  
Shanel Chandra, MBBS, Cincinnati, OH  
Courtney Chellew, D.O., Bethlehem, PA  
Juliana Chen, M.D., Newton, MA  
Michael S Chen, M.D., East Brunswick, NJ  
Stephanie Yu-Hsuan Chen, M.D., Anchorage, AK  
Jang Cho, M.D., Chevy Chase, MD  
Kang Won Mathew Choi, D.O., Arcadia, CA  
Hsun-Hua Chou, M.D., San Diego, CA  
Patrick Cleary, M.D., Media, PA  
Robert Maurice Coates Jr., M.D., Elk Grove, CA  
Ethel Marie Cobbett, M.D., Memphis, TN  
Ashleigh Colin, M.B.Ch.B., New Haven, CT  
Milangel Thaymee Concepcion, M.D., Washington, DC  
Ryan K Conner, D.O., Broomfield, CO  
Maria Carolina Court, M.D., San Diego, CA  
Jessica Lynn Crawford, M.D., Palo Alto, CA  
Gia Maria Crecelius, M.D., Los Angeles, CA  
John Michael de Vera Cruz, M.D., Union City, CA  
Christopher Stephen Cselenyi, M.D., New York, NY  
Allyson Witters Cundiff, M.D., Nashville, TN  
Shaleah Dardar, M.D., Aurora, CO  
Eswar K. Dayanandam, M.D., Paoli, PA  
Edwin Romel Soriano De Leon, M.D., Fullerton, CA  
Diana Dawn Deister, M.D., Brookline, MA

Damon Alexander DeLeon, M.D., Riverside, RI  
Brandon DeLiberato, D.O., Odessa, FL  
Manoela Fonseca Denman, M.D., Dallas, TX  
Danica Chandra Denton, D.O., Phoenix, AZ  
Pravesh Deotale, MD, St. Louis, MO  
Warren Keith DePonti, D.O., Fort Wayne, IN  
Namita Dhiman, M.D., Lynchburg, VA  
Noami Machorro Diaz, M.D., El Paso, TX  
Linda Do, D.O., Torrance, CA  
Natalie Do, D.O., Fullerton, CA  
Jimmy Doan, MD, Huntington Beach, CA  
Brandon Duft, M.D., Portland, OR  
Erika Beth Ebert, M.D., Sunapee, NH  
Vijayabharathi Ekambaram, M.B.B.S., Brookline, MA  
Darrell Andrew Elliott, M.D., Memphis, TN  
Shama Faheem, M.D., Canton, MI  
William Carson Felkel II, M.D., Winston Salem, NC  
Tania Fiacco, M.D., Toronto, ON  
Katrina Fletcher, M.D., Philadelphia, PA  
Margaret Ann Forszpaniak, DO, Naples, FL  
Cara Fosdick, M.D., Mason, OH  
Joshua Dozier Fowler, M.D., Irmo, SC  
Alan Joseph Frascoia, M.D., Brooklyn, NY  
Annie Naik Gadiparthi, M.D., Germantown, TN  
Priyanka Gait, M.B.B.S., Sherman Oaks, CA  
William Bryce Gammeter, M.D., Sioux Falls, SD  
Jason Lerand Gandy, M.D., Columbia, SC  
Dianelys Garcia, M.D., Bergenfield, NJ  
Smita Gautam, MD, Chicago, IL

Kayla Annette Gertsema, M.D., Austin, TX

Sadia Abdul Ghaffar, D.O., Clovis, CA

Jack London Gills, M.D., Rancho Murieta, CA

Andreanne Gingras, M.D., Poquoson, VA

Julianne Marie Giust, M.D., Indianapolis, IN

Vikram Manjunath Gopal, D.O., Mount Juliet, TN

Amanda Andrea Gorecki, D.O., Smithtown, NY

Hanady Abdulhady Gouta, M.B.B.S., Wallingford, CT

Rashi Govil, M.D., Forest Hills, NY

Rakesh Goyal, M.B.B.S., TOLEDO, OH

Tracy G Grabman, M.D., Knoxville, TN

Adam T. Graff, M.D., Flagstaff, AZ

Sabrina Gratia, D.O., North Babylon, NY

Erica Lisa Greenberg, M.D., Boston, MA

Judith Grimmond, M.D., Duluth, MN

Nicole Alexis Guanci, M.D., Bloomfield, NJ

Nihit Gupta, M.B.B.S., Washington, PA

Seema Anjali Gupta, M.D., Plano, TX

Tina Gurnani, M.D., Gainesville, FL

Sathyan Gurumurthy, M.D., Columbus, OH

Bindu Gutti, M.D., Latrobe, PA

Jarred Hagan, M.D., Lexington Park, MD

Brian James Haigh, M.D., Los Alamos, NM

Elsa Kristen Haloman, M.D., Sherman Oaks, CA

Jennifer Hardwick, M.D., Springfield, IL

James Michael Harper, M.D., Arlington, VA

Oliver Louis Harper, M.D., New York, NY

Miranda Rachelle Harris, M.D., Pineville, NC

David Andrew Hart, M.D., Oakwood, OH

Staci Hartman, D.O., San Antonio, TX

Katie Izumi Hatsushi, M.D., Fpo, AP

Jared Charles Heathman, M.D., Tomball, TX

Marc Aaron Heiser, M.D., Los Angeles, CA

Kristin Marie Hess, D.O., Brentwood, TN

Toni Hesse, M.D., Salt Lake City, UT

Laura Jennette Hesselink, D.O., Cedar Knolls, NJ

Alexis Sydney Hinds, M.D., Los Angeles, CA

Elena Marie Hissett, M.D., Copley, OH

Patrice Janell Holmes, M.D., West Hartford, CT

Elizabeth Homan, M.D., duluth, MN

Ji Su Hong, M.D., Creve Coeur, MO

Violette Hong, M.D., Berkeley, CA

Elizabeth Ann Horstmann, M.D., Los Angeles, CA

Paul Leonard Houser, MD, Cincinnati, OH

Kurt Derek Humphrey, M.D., Kaneohe, HI

Amber Hunt, D.O., Indianapolis, IN

Joshua Hvidding, M.D., Honolulu, HI

Gabriela Iagaru, M.D., Brighton, MA

Joseph-Pearl Immanuel, M.D., Sugar Land, TX

Brandon Ito, M.D., Los Angeles, CA

Peter Jackson, M.D., Waltham, MA

Richard DeWitt Jackson II, M.D., Winston-Salem, NC

Michael Jacobs, M.D., Oakland Park, FL

Sneha Prakash Jadhav, M.D., Frederick, MD

Robert Jaffe, M.D., New York, NY

Justin Paul Jamison, M.D., Plainfield, IL

Sara Ingrid Jeurling, M.D., Baltimore, MD

Brandon Johnson, M.D., NY, NY

Robert Johnston, M.D., Sudbury, MA  
Mirjana Jojic, M.D., Fairfield, CT  
Caroline Jones, M.D., Pittsburgh, PA  
Ann Joseph, M.D., Highlands Ranch, CO  
Heather Joseph, D.O., Pittsburgh, PA  
Peter Young Kang, DO, Cape Elizabeth, ME  
Chris Anthony Karampahtsis, M.D., M.P.H., Syosset, NY  
Harpreet Kaur, M.D., Chico, CA  
Manpreet Kaur, M.B.B.S., Glastonbury, CT  
Sonya Neda Kaveh, MD, Columbia, MD  
Suraya Kawadry, M.D., SAINT LOUIS, MO  
Niranjan KC, M.B.B.S., Elkhorn, NE  
Katie Keller, D.O., Beverly Hills, MI  
Marianna Isabel Kessimian, M.D., Cranston, RI  
Steve Khachi, M.D., Pasadena, CA  
Ahmed Raza Khan, M.D., Stanford, CA  
Gunjan Khandpur, M.D., Brookfield, WI  
Anbreen Khizar, M.B.B.S., Brooklyn, NY  
Hyun Jung Kim, M.D., New Haven, CT  
Sarah Richards Kim, M.D., New York, NY  
Holly Kinget, M.D., Austin, TX  
Shana Camille Kirby, M.D., Tampa, FL  
Kirstin Barrow Kirschner, M.D., Vashon, WA  
Peter Lance Klinger, M.D., Tucson, AZ  
Sharad Koirala, M.B.B.S., Chicago, IL  
Donald Jerome Kosatka, M.D., North Pole, AK  
Jay Kothari, M.D., Portland, OR  
Matthew D. Krasucki, M.D., Brookfield, WI  
Bassem Hussein Krayem, M.B.Ch.B., Canton, MI

Timothy Robert Kreider, M.D., Astoria, NY  
Rebecca A. Krill, M.D., Saint Louis Park, MN  
Arun Krishnan, M.B.B.S., Nashua, NH  
Katherine Krive, D.O., Lansing, MI  
Gaurav Kulkarni, M.B.B.S., Columbia, MO  
Nihit Kumar, M.B.B.S., Little Rock, AR  
Mani Abraham Kurien, M.D., Pittsford, NY  
Azad Paul Kurkjian, M.D., Los Angeles, CA  
Jacquelyn Michele LaGrone, M.D., Dallas, TX  
Matthew Peter Lahaie, M.D., Boston, MA  
Stacey Allison Laird, M.D., Mission Hills, KS  
Catherine Cody Larson, M.D., Austin, TX  
Amy Lynn Ledgerwood, M.D., Vacaville, CA  
Connie Lee, M.D., San Francisco, CA  
Katherine Elizabeth Lee, M.D., Cincinnati, OH  
Walter Korea Lee, M.D., Denver, CO  
Olga Leibu, M.D., New York, NY  
Rachel Idel Leidner, M.D., Dallas, TX  
Chad Lennon, M.D., Laurel, MD  
Howard Carl Levin, M.D., Nazareth, PA  
Richard Joseph LeVitre, M.D., San Antonio, TX  
Charles P Lewis, M.D., Rochester, MN  
Katherine Valerie Liebesny, MD, Roanoke, VA  
Howard Jung Shuo Lin, M.D., Tucson, AZ  
Patricia Lindahl, M.D., Oakland, CA  
Richard Linsk, M.D., Southfield, MI  
Anson Liu, M.D., Baltimore, MD  
Celeste Lopez, M.D., San Francisco, CA  
Liliana Lopez, M.D., Houston, TX



Maria Cristina Lopez-Rosario, M.D., Dallas, TX  
Matthew Ryan Jen-Teh Louie, M.D., Arcadia, CA  
Sara Lozyniak, M.D., Cambridge, MA  
Eric MacMaster, M.D., Syracuse, NY  
Richa Maheshwari, M.D., Springfield, VA  
Narpinder Kaur Malhi, M.B.B.S., media, PA  
Meghan Malhotra, M.D., Holtsville, NY  
Mariana Markella, M.D., San Jose, CA  
Allison Stokan Marshall, M.D., Houston, TX  
Zoe Allen Martinez, M.D., Ph.D, San Bruno, CA  
Colleen McGuire, M.D., Chicago, IL  
Ellika McGuire, M.D., Seattle, WA  
Brian Patrick McPhee, M.D., West Hollywood, CA  
Amit Mediratta, M.D., Brooklyn, NY  
Anuja Shah Mehta, M.D., Orlando, FL  
Uri Meller, M.D., New York, NY  
Marisa Mendel, M.D., Arlington, MA  
Constance Mennella, D.O., New York, NY  
Brian Merrill, M.D., Dayton, OH  
Chenel Michel, M.D., Charlotte, NC  
Hun Millard, M.D., Woodbridge, CT  
Jennifer Minami, M.D., New York, NY  
Kalpana Miriyala, M.D., Huntington, WV  
Othman Mahmoud Mohammad, M.D., Lynn, MA  
Andrea Moore, M.D., Portland, OR  
Jeremy Clint Moore, D.O., Mobile, AL  
Kelley Kathryn Moore, M.D., Denver, CO  
Milana Mor, M.D., New York City, NY  
Cynthia La Morgese Moran, M.D., Madison, WI

Larry Khashayar Mortazavi, MD, Denver, CO  
Radhika Movva, M.D., Sewickley, PA  
Phillip Michael Murray, M.D., Somerville, MA  
Manasa Musunuri, M.D., Louisville, KY  
Pubudini Savithri Muthukuda, M.D., Gaithersburg, MD  
Hari Nair, M.D., Palo Alto, CA  
Parvathy Nair, M.B.B.S., Hoffman Estates, IL  
Firas Abdussalam Nakshabandi, M.D., Chicago, IL  
Kishan Nallapula, M.B.B.S., Gainesville, FL  
Behrouz Namdari, M.D., Irvine, CA  
Chiranjir Narine, M.D., Mesa, AZ  
Lynn Kim Nguyen, M.D., New York, NY  
William Nguyen, M.D., New York, NY  
Syed Sarosh Nizami, M.D., Edmond, OK  
Ndidiyama Onyeawuli Nwaka, M.B.B.S., Salisbury, MD  
Vincent Nwabufu Nwankwo, M.B.B.S., Columbia, MO  
Lauren Bridget O'Connor, M.D., Oak Brook, IL  
Sarita Martene O'Neal, M.D., Winterville, NC  
Peter Oliver, MD, Durham, NC  
Ndidi Onyejiaka, M.D., Glencoe, IL  
Adewale Olatunji Oyemade, M.D., New Orleans, LA  
Krystal Ozanick, M.D., Seattle, WA  
Keyur Hareshbhai Parikh, M.D., Menomonee Falls, WI  
Taryn Mayumi Park, M.D., Mililani, HI  
Rashmi Prabhudas Parmar, M.D., Fremont, CA  
Matthew G Parra, MD, Reno, NV  
Alireza Parsoei, M.D., Springfield, OR  
Nirali Patel, M.D., Bergenfield, NJ  
Ravi Patel, M.B.B.S., Corona, CA

Smitta Patel, M.D., Los Angeles, CA  
Tejas C Patel, M.B.B.S., Newburgh, IN  
Nancy Ann Pattison, M.D., East Grand Rapids, MI  
Rohit Pawar, M.B.B.S., Ellisville, MO  
Lionel Elias Pereira, M.B.B.S., Somerville, MA  
Juee Sharad Phalak, M.B.B.S., Saint Louis, MO  
Blake Phillips, M.D., Brooklyn, NY  
Michelle Pietryga, M.D., Sherman Oaks, CA  
Jennifer Ellen Platt, D.O., Cedar Grove, NJ  
Melanie Johnson Pointer, M.D., Smyrna, GA  
Sara Jean Polley, M.D., Minnetonka, MN  
Benjamin D Potter, M.D., Columbia, SC  
Sonal Patel Prasad, M.D., Fort Worth, TX  
Stephanie L Price, D.O., Mt. Pleasant, SC  
Kristen Pyrc, M.D., Mansfield, TX  
Asfia Qadir, D.O., Woodbury, MN  
Shelah Beth Radke, M.D., Reston, VA  
Monila Rahimi, D.O., Carmichael, CA  
Lalita Devi Ramnaraine, M.D., Newberry, FL  
Ujjwal Premchand Ramtekkar, M.B.B.S, MPE, Ballwin, MO  
Sundeep Singh Randhawa, M.D., Chicago, IL  
Noshene Ranjbar, M.D., Tucson, AZ  
Suchet Rao, M.B.B.S., New York, NY  
Tam Nguyen Redd, M.D., Garland, TX  
Michelle Reeves, M.D., Decatur, AL  
Kelly Anne Register-Brown, M.D., Gaithersburg, MD  
Racquel Reid, M.D., San Antonio, TX  
Adam Richmond, M.D., Lone Tree, CO  
Darice Melisse Rodriguez, M.D., Sugar Land, TX

Leah Ellen Rosenkrantz, D.O., Moorestown, NJ  
Loucresie Rupert, M.D., Goodview, MN  
Douglas Russell, M.D., Kenmore, WA  
Deana Marie Sabol, D.O., Philadelphia, PA  
Briana Dore Sacco, M.D., Plano, TX  
Emily A Sadik, D.O., Portland, OR  
Azita Safai, M.D., Belton, TX  
Gleydys Salgado Cardoso, M.D., Sarasota, FL  
Cristina Ivette Sanchez Torres, M.D., Middletown, CT  
Jessica Flores Sandoval, M.D., San Antonio, TX  
Javier Santos Cubix , M.D., Waxhaw, NC  
Douglas Saphier, M.D., Englewood, NJ  
Meha Saxena, M.D., Savannah, GA  
Heather Shacket, M.D., San Diego, CA  
Shervin Shadianloo, M.D., New York, NY  
Jyoti Shah, DO, Naperville, IL  
Imran Mohammad Shakir, D.O., Roselle, IL  
Desiree Shapiro, M.D., San Diego, CA  
Varun Sharma, M.B.B.S., Wilmington, DE  
George Michael Shehi Jr, M.D., Gadsden, AL  
Daphna Shiffeldrim, M.D., New York, NY  
Frances Sugene Shin, M.D., New York, NY  
Daisy Shirk, D.O., Hummelstown, PA  
Walter James Shuham, M.D., Los Angeles, CA  
Garima Singh, M.B.B.S., columbia, MO  
Kimberley Siscoe, M.D., Greer, SC  
Mauran Sivananthan, D.O., Ann Arbor, MI  
Jolie Katherine Cullen Skelton, M.D., New Braunfels, TX  
Bridget Skidmore, M.D., Morgantown, WV

Paula Marie Smith, M.D., Hamden, CT  
Rebekah Marie Smith, M.D., Anchorage, AK  
Monica Soliman, M.D., Los Alamitos, CA  
Claire Mikhaila C Sollars, MD, Mesa, AZ  
Nichole Sonderman, M.D., Cincinnati, OH  
Steven Francis Sonnek, M.D., Victoria, MN  
Anthony Dale Sossong, M.D., Boston, MA  
Shirley Sostre-Oquendo, MD, Hackensack, NJ  
Alma Spaniard, M.D., Tuckahoe, NY  
Veraanong Srakhao, M.D., Brooklyn, NY  
Rekha Srinivasan, M.D., Egg Harbor City, NJ  
Diane St. Fleur, M.D., Syracuse, NY  
Michael Stachniak, D.O., Harker Heights, TX  
Jessica Lauren Stahl, M.D., Tucson, AZ  
Jeffrey Stearns, M.D., Grand Rapids, MI  
Rachel Rebecca Stein, D.O., Hillsborough, NC  
Jaime Stevens, M.D., Honolulu, HI  
Rachel Sullivan, M.D., Mililani, HI  
Ryan Sultan, M.D., NY, NY  
Jennifer L Sweet, M.D., Oakland, CA  
Ashish Tambar, M.D., Washington, DC  
Rokeya Tasnin, M.D., Waynesville, OH  
David Arthur Tatum, D.O., Mint Hill, NC  
Rebecca Taylor, M.D., Chapel Hill, NC  
Akanksha Thakur, M.D., New Orleans, LA  
Jayaselvi Thanaseelan, M.D., Sugar Land, TX  
Jeanne Marie Theobald, M.D., Denver, CO  
Joshua Thomas, M.D., Sugar Land, TX  
Kelton Manor Thomas, M.D., Apo, AP

Natasha Merlyn Thomas, M.D., La Canada Flintridge, CA

Nina Marie Tioleco, M.D., New York, NY

Dimas Tirado-Morales, M.D., Cordova, MD

Emily Todd, M.D., Santa Monica, CA

Maria del Pilar Trelles Thorne, M.D., New York, NY

Lesia Malko Trickett, M.D., San Antonio, TX

Michael Warren Tsappis, M.D., Beverly, MA

Jimena Tuis-Elizalde, M.D., Milford, CT

Maureen Ann Ullrich, M.D., Denver, CO

Divya Vemuri, M.D., Novi, MI

Sarah Mallard Wakefield, M.D., Lubbock, TX

Leorah M Walsh, M.D., Haverford, PA

Allyson Kathryn Wells, M.D., Long Beach, CA

Trevor Owen Wells, M.D., Long Beach, CA

Micaela Patricia Wexler, D.O., Leawood, KS

Megan White, M.D., Austin, TX

Patrick George Wiita, M.D., West Hollywood, CA

Margarita A Wilkes, M.D., Mount Pleasant, SC

Joshua Williams, M.D., Park Ridge, IL

Kyle Allen Williams, M.D., Boston, MA

Laura Willing, M.D., Washington, DC

Victoria Sophia Winkeller, M.D., Pittsburgh, PA

Alan Wittenberg, M.D., New York, NY

Shinji Yasugi, M.D., Grand Rapids, MI

Allison Yoder, M.D., Shepherdsville, KY

Nina Yokochi Funkhouser, D.O., Wilmington, NC

Byron Mark Anthony Young, M.D., Brooklyn, NY

Mina Youssef, M.D., Redondo beach, CA

KwiYun Cassie Yu, M.D., Seattle, WA

Isheeta Zalpuri, M.B.B.S., San Diego, CA

Yuanfen Zhang, M.D., Potomac, MD

Nicole Alexandra Zuber, M.D., East Rutherford, NJ

**CAP Maintenance of Certification, April 18, 2016**

Stewart Lawrence Adelson, M.D., New York, NY

Svetlana Anic, M.D., Atascadero, CA

Monica Arora, M.D., Omaha, NE

Sevim Bennett, M.D., Edmond, OK

Tiberiu Florin Bodea Crisan, M.D., Pittsburgh, PA

Peggy Ann Bohnert, M.D., East Aurora, NY

Judith Lea Boyer-Patrick, M.D., M.P.H., Ellicott City, MD

Robert Crocker Brasted Jr., M.D., Eugene, OR

John Joseph Broderick-Cantwell, M.D., Fairhope, AL

Alycia Moore Brown, M.D., Fort Wayne, IN

V. Renee Burdett, M.D., Woodbridge, VA

Fee Sean Jane Chin, M.D., San Diego, CA

John Anderson Coons, M.D., Lake St Louis, MO

Stephen Lee Cosby, M.D., Akron, OH

Cynthia Marie De Vos, M.D., The Woodlands, TX

John Morrison Delaney, M.D., Carmel, IN

Angela Dumitrache, M.D., Frederick, MD

Lisa Ann Durette, M.D., Las Vegas, NV

Elizabeth Adele Finley-Belgrad, M.D., Boardman, OH

Jeri Eileen Fitzpatrick, M.D., Nashville, TN

Charles Andrew Fleischer, D.O., Rcho Santa Fe, CA

Rachel Mary Fleissner, M.D., Fargo, ND

Sheri Cording Gaines, M.D., Huntsville, TX

Niladri Ganguli, M.D., Great Neck, NY

Richard Holmes Gilchrist, M.D., Columbus, OH  
Kamalinder Kaur Goraya, M.D., Rockville, MD  
Olivier Goust, M.D., Durham, NC  
Nabil Yacoub Guirguis, M.D., Spring, TX  
Joyce Nolan Harrison, M.D., Baltimore, MD  
Sean Young-Il Haugh, M.D., Mountain View, CA  
Jeffrey Von Hill, M.D., Apo, AE  
Bohdan Nicholai Hrecznyj, M.D., Clarkdale, AZ  
Yadollah Mahmood Jabbarpour, M.D., Salem, VA  
Jeffry Alan Jacobs, M.D., Knoxville, TN  
Thomas McIntosh Jones, M.D., Ph.D., F.A.A.P., Durango, CO  
Murray Lee Kapell, M.D., Madison, WI  
Asha Keshavan, M.D., Westwood, MA  
Tina Lynn Kosnar, M.D., Madison, WI  
Regina Koziyevskaya, M.D., Waban, MA  
Leonard Kendall Lantz, M.D., Helena, MT  
Kathleen G. Lapp, M.D., Chapel Hill, NC  
Feng Liu, M.D., Scarsdale, NY  
Rajendra Lowtan, M.D., Ellicott City, MD  
Amy MacIntyre, M.D., Bala Cynwyd, PA  
Harry Wallace Mahood, M.D., Schuylerville, NY  
Christopher Gerard Martin, M.D., Amherst, NY  
Melisa Ybarra Martinez, M.D., Zionsville, IN  
Megan Takeko Marumoto, M.D., Alexandria, VA  
Tamar Beth Mathias, M.D., Ridgefield, CT  
Jane Jasna Miles, M.D., Plano, TX  
Joanne Minerva, M.D., Bala Cynwyd, PA  
Jose Luis Montaner, M.D., Lancaster, PA  
Lynn Marie Mousel, M.D., Great Falls, MT



Siham Muntasser, M.D., Winston Salem, NC  
Robert Seymour Newbrough, M.D., Kennett Square, PA  
Douglas Keith Novins, M.D., Denver, CO  
Alphonse Daniel Osinski, M.D., Mount Kisco, NY  
Robyn Leigh Ostrander, M.D., Falmouth, ME  
Nilesh J. Patel, M.D., Sugar Land, TX  
Susan Jo Perlmutter, M.D., Reston, VA  
Malinda Marley Pike, M.D., Great Falls, MT  
Boris Joseph Porto, M.D., Lubbock, TX  
Laura Marie Prager, M.D., Waban, MA  
Marina Radisic-Basovic, M.D., South Easton, MA  
Snieguole Radzeviciene, M.D., Muncie, IN  
Rajendra Thekkeurumbil Raman, M.D., Knoxville, TN  
Ramineni Rathnamala Rao, M.D., Livermore, CA  
Sriramamurthy Ravipati, M.D., Omaha, NE  
Vedhire Subbalaxmi Reddy, M.D., Orange, CA  
Shauna Pencer Reinblatt, M.D., Baltimore, MD  
Shelly Lynn Riley, M.D., Austin, TX  
Adelaide Sherwood Robb, M.D., Chevy Chase, MD  
Heidi Avenelle Rosenbaum, M.D., Santa Paula, CA  
Jose Arturo Sanchez-Lacay, M.D., Palisades Pk, NJ  
Sadhana Sardana, M.D., West Nyack, NY  
Daniel Maynard Savin, M.D., Denver, CO  
Jennifer Rebecca Scarozza, M.D., Buffalo, NY  
Roy Walter Schlegel, M.D., Olympia, WA  
Steven Cary Schlozman, M.D., Belmont, MA  
Aditya Sharma, M.D., Murphy, TX  
Tangeneare Ward Singh, M.D., Alexandria, VA  
Rumen Slavkov, M.D., Newcastle, WA

Annette Marie Smick, M.D., Saint Charles, MN  
Angela L. Smith, M.D., New York, NY  
Suzanne Teresa P.V. Sundheim, M.D., Auckland, N Island  
Marshall Lee Teitelbaum, M.D., Jupiter, FL  
Patricia A. Toups, M.D., Baton Rouge, LA  
Victoria Urrutia, M.D., Port Matilda, PA  
Julie Lara Weinbach, M.D., Pacific Palisades, CA  
John Elgin Wilkaitis, M.D., M.S., Brandon, MS  
Kirk Dana Wolfe, M.D., Lake Oswego, OR  
Elizabeth Raphael Wolff, M.D., Brooklyn, NY  
Richard Lowell Worth, M.D., Shrewsbury, NJ  
Jing Xu, M.D., Scarsdale, NY  
Ateka Zaki, M.D., Sugar Land, TX  
Jessica Lynn Zimmerman, M.D., Bala Cynwyd, PA

**CAP Maintenance of Certification, October 31, 2016**

Aurif Akhtar Abedi, M.D., Ann Arbor, MI  
Robert McLain Adams IV, M.D., Wilmington, NC  
Richard John Alden, M.D., Portland, OR  
Carlin Ann Alleyne, M.D., Owings Mills, MD  
Jeffrey Lee Almony, M.D., Broomfield, CO  
Rossana I. Avelino, M.D., Wallingford, PA  
Steven Jeffrey Bonauto, M.D., Sharon, MA  
Timothy David Brewerton, M.D., Isle of Palms, SC  
Millard Dalton Brown III, M.D., Kaneohe, HI  
Diana Ochoa Chu, M.D., Chicago, IL  
Paul David Clein, M.D., Germantown, TN  
Dianne Louise Collins, D.O., Roseville, CA  
Sharon Lynn Curtis, M.D., Schererville, IN

Maria DePena-Nowak, M.D., Rye, NY  
Arden Dallas Dingle, M.D., San Benito, TX  
Evan F. Duffy, M.D., Fountain Hills, AZ  
Todd S. Elwyn, M.D., San Luis Obispo, CA  
Michael Ellery Faran, M.D., University Place, WA  
Candida A. Fink, M.D., New Rochelle, NY  
James Kenneth Freeman, M.D., Austell, GA  
Richard Adam Goldwasser, M.D., Tiburon, CA  
Susan Isabel Goldwasser, M.D., Tiburon, CA  
Darin Edward Gould, M.D., Kaneohe, HI  
Kristyn Marie Gregory, D.O., Washington, MI  
Celeste M. Grosso, M.D., Rhinebeck, NY  
Adrienne Kimberly Hall, M.D., Sacramento, CA  
James Michael Harle, M.D., Bellingham, WA  
Steven Walter Heimann, M.D., Suffolk, VA  
Vincent Yuan Zheng Ho, M.D., Atlanta, GA  
Jasper Cory Hollingsworth, M.D., Santa Rosa, CA  
Mark Irvin Holub, M.D., Roseville, MN  
Grace Efiok Inyang, M.D., Clinton, MD  
Kara Liebling Kahan, M.D., Houston, TX  
Mark Duane Kilgus, M.D., Winnsboro, SC  
David A. Krulee, M.D., Wallingford, CT  
Josephine Kuhl, M.D., White Plains, NY  
Sanjiv Kumra, M.D., Woodbury, MN  
Janet Elizabeth Lainhart, M.D., Madison, WI  
Frank Willy Lehninger, M.D., Naples, FL  
Hope Wendy Levin, M.D., Pacific Palisades, CA  
Kiran Sunil Lulla, M.D., Weston, MA  
Glenna E. Major, M.D., Louisville, KY

Jesus-Martin Maldonado-Duran, M.D., Houston, TX  
Ginger Lee Manzo, M.D., Lincoln, RI  
Richard Stephen Marcus, M.D., Dorchester Center, MA  
Christopher John McDougle, M.D., Boston, MA  
Emad Ramses Milad, M.D., Hampstead, NH  
Ahsan Nazeer, M.D., Portage, MI  
Mark Warren Olsen, M.D., Rochester, MN  
Mark Frederick Owens, M.D., San Antonio, TX  
Lisa Ann Pan, M.D., Pittsburgh, PA  
Niraja Tadikonda Patel, D.O., Scottsdale, AZ  
Pukur Natvarlal Patel, M.D., Goshen, KY  
Venus C. Paxton, M.D., San Diego, CA  
Shamsuddin Sherali Pepermintwala, M.D., MIDLAND, TX  
Leah Dorothea Perez, M.D., Dunlap, IL  
Christopher Kenneth Peters, M.D., Louisville, KY  
Yann Bruno Poncin, M.D., Cheshire, CT  
Elizabeth Estelle Pritchett, M.D., Clarksville, TN  
Brad Reddick, M.D., Davidson, NC  
Hilton J. Rodriguez, M.D., Avalon, NJ  
Russell Edward Scheffer, M.D., Wichita, KS  
Kathy Scott-Gurnell, M.D., Pearland, TX  
Muniza Shah, M.D., Hellertown, PA  
Judith Shay, M.D., Bronx, NY  
Susannah Sherry, M.D., Watertown, MA  
Francis Shih, M.D., Anaheim, CA  
Douglas Francis Spellman, M.D., Omaha, NE  
Anna-Lisa B. Stonehill, M.D., Newport Beach, CA  
Beverly Jean Stoute, M.D., Brookhaven, GA  
Ahmed Abdelfattah Taranissi, M.D., Columbia, MO

Jeanie Marie Thompson, M.D., Godfrey, IL

Elaine Tierney, M.D., Baltimore, MD

Robertson Buell Tucker, M.D., Philadelphia, PA

James Ronald Varrell, M.D., Marlton, NJ

Roma Ashok Vasa, M.D., Cockeysville, MD

Jeremy Michael Veenstra-VanderWeele, M.D., New York, NY

Hamilton Warren-Sutton, M.D., Boise, ID

Bruce Waslick, M.D., Longmeadow, MA

Victoria Paris Wolfson, M.D., Somerville, MA

William Curtis Wood, M.D., New York, NY

**CAP Part II Certification, March 18, 2016**

Lalit Shanker Chaube, M.D., Port St Lucie, FL

Malika Dashawne Closson, M.D., Laurel, MD

Theodor Ene, M.D., Providence, RI

Jessica Gilbertson Hitchcock, M.D., Portland, OR

Cynthia Marie Huntimer, M.D., M.P.H., Willmar, MN

Kyle Edwin Johnson, M.D., Springdale, AR

Alamdar Hussain Kazmi, M.D., Ottawa Hills, OH

Mohammad Amjadullah Khan, M.D., West Lake Hills, TX

Catherine Jackson Kuniyoshi, M.D., Tacoma, WA

Jon Shinzen Kuniyoshi, M.D., Ph.D., Tacoma, WA

Syed Zia Manzoor, M.D., Mechanicsburg, PA

Rose Michael, M.D., Rego Park, NY

Stephen Darrell Mullins, M.D., Pittsburgh, PA

Fathima Farhana Musthaq, M.D., Plymouth Meeting, PA

Arman Haider Siddiqui, M.D., Fishers, IN

Preeti Venkataraman, M.D., Bloomfield Hills, MI

**CAP Part II Certification, September 16, 2016**

Mercedes Engracia Agudo, M.D., Chandler, AZ

Patricia Ann Daly, M.D., Lynchburg, VA

**CNP Maintenance of Certification, May 2, 2016**

Harry Shore Abram, M.D., Jacksonville, FL

Mahmoud Mustafa Abu-Ata, M.D., Columbia, SC

Sarab Alseoudi, M.D., Newton, KS

Anne Elizabeth Anderson, M.D., Houston, TX

Rizwan Saleem Bajwa, D.O., Oak Brook, IL

Michael Ross Balm, M.D., Springfield, OR

Jane Gibert Boggs, M.D., Martinsville, VA

Richard Thomas Brannegan, M.D., Oak Park, IL

Jordan Alan Brooks, M.D., Dayton, OH

Timothy Davis Carter, M.D., Melbourne, FL

James Lawrence Case, M.D., Dakota Dunes, SD

Mauricio R. Delgado-Ayala, M.D., Dallas, TX

Mazen Mohammad Dimachkie, M.D., Overland Park, KS

Elliot Lester Dimberg, M.D., Ponte Vedra Beach, FL

Barbara Ann Dworetzky, M.D., West Roxbury, MA

Erhan Ergene, M.D., Dunlap, IL

Miles Steven Evans, M.D., Louisville, KY

Jose Palafox Fernandez Jr., M.D., Hattiesburg, MS

Eric Bernard Geller, M.D., Livingston, NJ

John Willard Gibbs III, M.D., Ph.D., Winterville, NC

Adam Mehmet Gulhan, M.D., Charlotte, NC

Raj Gupta, M.D., Fremont, CA

Laurie Gutmann, M.D., Iowa City, IA  
John Michael Hannam, M.D., Omaha, NE  
Ruth Ann Henchey, M.D., Pensacola, FL  
Aatif Mairaj Husain, M.D., Durham, NC  
James Arnold Isaac, M.D., Hutchinson, KS  
Monica Parveen Islam, M.D., Columbus, OH  
Safwan Salim Jaradeh, M.D., Redwood City, CA  
Sigmund Gard Jenssen, M.D., Santa Fe, NM  
Vern Charles Juel, M.D., Durham, NC  
Padmaja Naga Kandula, M.D., New York, NY  
James Jong Kim, M.D., Los Angeles, CA  
Allan Krumholz, M.D., Baltimore, MD  
Paul Soonjae Kwon, M.D., Fair Oaks, CA  
Barbara Anne Landesman, M.D., Sacramento, CA  
Kyunghang Steven Lee, M.D., Tarrytown, NY  
Alison Marie Leston, M.D., Ph.D., Irving, TX  
Glenn Alexander Mackin, M.D., Allentown, PA  
Zohreh Mahdavi, M.D., Minneapolis, MN  
Saleem Iqbal Malik, M.D., Colleyville, TX  
Amy Denise Malphrus, M.D., Houston, TX  
Jorge Marquez De Leon, M.D., Mequon, WI  
Alan William Martin, M.D., Dallas, TX  
Michelle Leah Mellion, M.D., South Easton, MA  
Lola Claire Morgan, M.D., San Antonio, TX  
Lawrence Daniel Morton, M.D., Midlothian, VA  
Anthony Michael Murro, M.D., Martinez, GA  
Siddhartha Shyam Nadkarni, M.D., Montclair, NJ  
James Wyche Manier Owens, M.D., Ph.D., Shoreline, WA  
Mohammad Feroz Padela, M.D., Clifton, NJ

Ognen A. C. Petroff, M.D., Cheshire, CT

Allen Danforth Pettee, M.D., Rochester, NY

Mark Stephen Quigg, M.D., MSc, Charlottesville, VA

Baldev Singh Rai, M.D., Newport Coast, CA

Brion David Reichler, M.D., New York, NY

Alexandra Reznikov, M.D., Valley Stream, NY

Michael Lawrence Rossen, M.D., Ph.D., Springfield, MA

Seward Brian Rutkove, M.D., Brookline, MA

Sanjiv Kumar Sahoo, M.D., Tampa, FL

Firas Ghazi Saleh, M.D., Wesley Chapel, FL

Stephen Nicholas Scelsa, M.D., New York, NY

Greg A. Schaublin, M.D., Trenton, OH

Howard Morris Schecht, M.D., Toledo, OH

Catherine Anne Schevon, M.D., New York, NY

James Franklin Selwa, M.D., Ann Arbor, MI

Irene Semenov, D.O., Glenview, IL

Raj Dilip Sheth, M.D., Jacksonville, FL

Mark Brian Skeen, M.D., Durham, NC

Eric Bruce Sklar, M.D., Potomac, MD

Benn Eugene Smith, M.D., Scottsdale, AZ

Kimberly Kay Smith, M.D., Dalton, GA

Maria Josephine Sunseri, M.D., Pittsburgh, PA

Masanori Takeoka, M.D., Newton, MA

Timothy Kent Thoits, M.D., Grand Rapids, MI

Teresa Anh Tran-Lim, M.D., Mendota Heights, MN

David M. Treiman, M.D., Phoenix, AZ

Yedatore Swamy Venkatesh, M.D., Columbia, SC

James Christopher Watson, M.D., Rochester, MN

Wade B. Welch, M.D., Topeka, KS



Angus Arthur Wilfong, M.D., Phoenix, AZ

Brian Frederick Wiseman, M.D., Knoxville, TN

Gil Iven Wolfe, M.D., Buffalo, NY

Rosabel Ribares Young, M.D., M.S. Pharm., Redlands, CA

Joy Yan Zhao, M.D., Bellevue, WA

Mary Lynn Zupanc, M.D., Orange, CA

**CNP Maintenance of Certification, July 15, 2016**

Firas Beitinjaneh, M.D., virginia Beach, VA

Roger Victor Bertoldi, M.D., Los Angeles, CA

James Anthony Ware Jr., M.D., Plainsboro, NJ

**EP Certification, October 24, 2016**

Harry Shore Abram, M.D., Jacksonville, FL

Natasha Elena Acosta Diaz, M.D., Fayetteville, NC

Seema Afridi, M.D., Bellingham, WA

Nitin Agarwal, M.B.B.S., Woodbury, MN

Sahar Ahadi, M.D., Fresno, CA

Saba Ahmad, M.D., Chicago, IL

Cigdem Inan Akman, M.D., Haworth, NJ

Raidah Saleem Al-Baradie, M.D., Dhahran, Eastern Province

Saima Ali, M.D., Englewood, NJ

Sasha Alick, M.D., Irving, TX

Khalid Saleh Alqadi, M.B.B.S., Bowie, MD

Abdulradha Alqallaf, M.B.Ch.B., Garland, TX

Khalid AlSherbini, M.D., Germantown, TN

Timothy Michael Ambrose, M.D., Philadelphia, PA

Anik Amin, M.D., Seattle, WA

Deepti Anbarasan, M.D., Bronx, NY

Christopher Todd Anderson, M.D., Delafield, WI  
Rami Garo Apelian, M.D., M.P.H., Pasadena, CA  
Merveen Appu, M.B.B.S., Springfield, IL  
Jose J Arias-Morales, M.D., San Juan, PR  
Michelle Armacost, M.D., Los Angeles, CA  
Daniel Henry Arndt, M.D., Bloomfield Hills, MI  
Kapil Arya, MBBS, Little Rock, AR  
Fareeha Ashraf, M.D., Cleveland, OH  
Basel Assaad, M.D., West Bloomfield, MI  
Chalita C. Atallah, M.D., Hanover, MD  
Erica Ann Austin, D.O., Traverse City, MI  
Jennifer Avallone, D.O., Florham Park, NJ  
Michael A Babcock, M.D., Greenville, SC  
Christine Mary Bower Baca, M.D., Denver, CO  
Karen Ruth Ballaban-Gil, M.D., Prt Washingt, NY  
Susanta Bandyopadhyay, M.D., Ph.D., Columbia, MO  
Sandipan Pati Bankim Behari Pati, M.D., Birmingham, AL  
Elizabeth Barry, M.D., Baltimore, MD  
Fiona Baumer, M.D., Menlo Park, CA  
Christopher Beatty, M.D., Seattle, WA  
Danielle Alyse Becker, M.D., Wilmington, DE  
Nicholas James Beimer, M.D., Ypsilanti, MI  
Michelle Wilson Bell, M.D., Brooklyn, NY  
Bryan Kenneth Berger, M.D., Delaware, OH  
Tejwant Bindra, D.O., Miller Place, NY  
Andrew Steven Blum, M.D., Ph.D., Newton, MA  
Jane Gibert Boggs, M.D., Martinsville, VA  
Prashanthi Boppana, M.D., Wilmette, IL  
Samip Jayantilal Borad, M.B.B.S., MHA, M.D., Charleston, WV

Xiuhua Liang Bozarth, M.D., Seattle, WA

James Nicholas Brenton, M.D., Charlottesville, VA

Richard David Brower, M.D., El Paso, TX

Christopher Patrick Brown, M.D., Stillwater, MN

Joseph Brown, M.D., Olney, MD

Mesha-Gay Melanie Brown, M.D., Denver, CO

David Dwight Buckland, D.O., Palmer, AK

David B Burkholder, M.D., Rochester, MN

Brian Cabaniss, M.D., San Francisco, CA

Javier Chapa Davila, M.D., Gurabo, PR

Geetha Chari, M.D., Brooklyn, NY

Gabrielle Marie Chassagne, M.D., East Hills, NY

Micaela Tegan Chatman, M.D., Saint Paul, MN

David Kuan-Hua Chen, M.D., Houston, TX

Hai Chen, M.D., Washington, DC

Merry Chen, M.D., Houston, TX

Stephanie Chen, M.D., Baltimore, MD

Jocelyn Y Cheng, M.D., New York, NY

Mahesh Chikkannaiah, M.B.B.S., M.D., Dayton, OH

Jeremy Adam Cholfin, M.D., PhD, Encino, CA

Derek Chong, M.D., M.Sc., New York, NY

David Ta-wei Chuang, M.D., Tenafly, NJ

Allison Hovland Conravey, M.D., Destrehan, LA

Nicole Melissa Corrigan, M.D., Weehawken, NJ

Karen Cruz-Rodriguez, M.D., Caguas, PR

Alexis M Dallara, M.D., Ridgewood, NJ

Louis Tuong Chinh Dang, M.D., Livonia, MI

Hina Narendra Dave, M.D., Dallas, TX

Raymund Roque David, M.D., Fresno, CA

Kathryn Adamiak Davis, M.D., Swarthmore, PA  
Robin Claire Davis, M.D., Metairie, LA  
Brian Keith Day, M.D., Ph.D., Chesterfield, MO  
Gina Marie Deck, M.D., Providence, RI  
Scott Demarest, M.D., Aurora, CO  
John Michael Dempster Jr., M.D., Portland, OR  
Elakkat Dharmaraj Gireesh, M.D., Oviedo, FL  
Marissa Pia Di Giovine, M.D., Wyckoff, NJ  
Gloria Diaz-Medina, M.D., Weston, FL  
Deanna Lizette Dickens, M.D., Minneapolis, MN  
Marisara Dieppa, M.D., Dallas, TX  
Alison Dolce, M.D., Dallas, TX  
Kendra W Drake, M.D., Tucson, AZ  
Antao Du, M.D., Plano, TX  
Susan Erin Duberstein Coad, M.D., New York, NY  
Preethi Durgam, D.O., Houston, TX  
Barbara Ann Dworetzky, M.D., West Roxbury, MA  
Sylvia A. Edelstein, M.D., Cabin John, MD  
Jeffrey John Ekstrand, M.D., Portland, OR  
Amro A El Feki, M.D., Friendswood, TX  
Mirret El-Hagrassy, M.B.Ch.B., Charlestown, MA  
Omar Elghawanmeh, M.D., Catlettsburg, KY  
Muruvet Elkay, M.D., Glen Oaks, NY  
Hoda Kamel Elzawahry, M.D., Panama City, FL  
Lia Deleon Ernst, M.D., Portland, OR  
Antonio V. Escueta, M.D., Los Angeles, CA  
Miles Steven Evans, M.D., Louisville, KY  
Daniel Ralph Fain, M.D., ADA, MI  
Erin Marie Fedak Romanowski, D.O., Ann Arbor, MI

Elizabeth Felton, M.D., Madison, WI  
Victor Ferastraoaru, M.D., Bronx, NY  
Gregory John Ferenz, D.O., Bend, OR  
Enrique J. Fernandez, M.D., Brunswick, GA  
Luis De Jesus Fernandez, M.D., Pittsburgh, PA  
Jessica Rochelle Fesler, M.D., Willoughby, OH  
Anteneh Mekonnen Feyissa, M.D., Jacksonville, FL  
Madeline Cara Fields, M.D., New York, NY  
Francis M. Filloux, M.D., Salt Lake City, UT  
Sarah Grace Finnegan, M.D., Ph.D., Clarence, NY  
Meghan Elizabeth Fleming, D.O., New York, NY  
Amanda Clark Floyd, M.D., Hickory, NC  
Eric Shrader Frechette, M.D., Ph.D., Pasadena, CA  
Laura Friedlander, M.D., Littleton, CO  
France Fung, M.D., Philadelphia, PA  
Camilo Ivan Garcia Gracia, M.D., Miami Shores, FL  
Tyler Gaston, M.D., Birmingham, AL  
Jay Gavvala, M.D., Katy, TX  
Michael Avram Gelfand, M.D., Philadelphia, PA  
Eric Bernard Geller, M.D., Livingston, NJ  
Hlynur Georgsson, M.D., Richmond, VA  
Elizabeth E Gerard, M.D., Chicago, IL  
Daryoush Gharghi, MD, Markham, ON  
Vincent Paul Gibbons, M.D., Madison, WI  
Tatyana R. Gitlevich, M.D., Scarsdale, NY  
Robert Glover, M.D., Buffalo, NY  
Daniel Goldenholz, M.D., Silver Spring, MD  
Hui Gong, M.D., La Canada Flintridge, CA  
Victor Hugo Gonzalez Montoya, M.D., Glen Allen, VA

Monisha Goyal, M.D., Birmingham, AL  
Leslie Perry Grayson, M.D., Homewood, AL  
Herbert E Gregg, M.D., Lenox, MA  
Jessie Grewal, M.D., Grove City, OH  
Christina Ann Gurnett, M.D., Ph.D., Saint Louis, MO  
Lalitha Naga Priya Guthikonda, M.D., Sugar Land, TX  
Arash Hadipour Niktarash, M.D., Denver, CO  
Jin S. Hahn, M.D., Palo Alto, CA  
Hiba Arif Haider, MD, Atlanta, GA  
Ara S Hall, M.D., Overland Park, KS  
Mostafa Hammoudi, M.D., Clive, IA  
Samrina Hanif, M.D., Barboursville, WV  
Mohamed Hegazy, M.B.Ch.B., Overland Park, KS  
Aamr Arif Herekar, M.D., Fort Worth, TX  
Cherie Lynette Herren, M.D., Edmond, OK  
Chloe Electra Hill, M.D., Philadelphia, PA  
Manisha Gupte Holmes, M.D., New York, NY  
Sarah Jane Hon, D.O., Liberty, MO  
Omotola A. Hope, M.D., Houston, TX  
Jennifer Lynn Hopp, M.D., Fulton, MD  
Romy Hoque, M.D., Atlanta, GA  
Feng Hua, M.D., Modesto, CA  
Inna Hughes, M.D. PhD, Rochester, NY  
John David Hughes Jr., M.D., Silver Spring, MD  
Christine Hung, M.D., New York, NY  
Addie Stark Hunnicutt, M.D., Greenville, SC  
Asima Husain, M.D., Plano, TX  
Sean Tchanho Hwang, M.D., Manhasset, NY  
Ann Elizabeth Hyslop, M.D., Miami, FL

Mohammed Ilyas, M.B.B.S., Overland Park, KS  
Kenneth William Imerman, M.D., Albuquerque, NM  
Shalaka D Indulkar, M.D., Fayetteville, NC  
Christopher Mario Inglese, M.D., Milwaukee, WI  
John Bradford Ingram, M.D., Madison, MS  
Katherine Slezicki Inoyama, M.D., Florham Park, NJ  
Thomas Ashby Ireland Jr, M.D., Lookout Mountain, GA  
Naoum Issa, M.D., Chicago, IL  
Richard Thomas Jackson, M.D., Saratoga Springs, NY  
Mercedes Paula Jacobson, M.D., Wynnewood, PA  
Deepali Jain, M.D., lithia, FL  
Laura Ann Jawidzik, M.D., Vienna, VA  
Lara Jehi, M.D., Pepper Pike, OH  
Sigmund Gard Jensen, M.D., Santa Fe, NM  
Anna B Jeong, M.D., Chicago, IL  
Suda Jirasakuldej, M.D., Slippery Rock, PA  
Emily Johnson, M.D., Baltimore, MD  
Sucheta Madhav Joshi, MBBS, M.D., Ann Arbor, MI  
Robert Alexander Joshua, M.D., White Plains, NY  
Mithri Junna, M.D., Rochester, MN  
Haidar Kabbani, M.D., Mason, OH  
Ahmad Kasim Kaddurah, M.D., Grand Blanc, MI  
Hamid Haroon Kadiwala, M.D., Richardson, TX  
Khalid Salem Kakish, M.D., Buffalo, NY  
Laura Ann Kalayjian, M.D., Sierra Madre, CA  
Padmaja Naga Kandula, M.D., New York, NY  
Joon Yi Kang, M.D., Baltimore, MD  
Leena Raj Kansal, M.D., San Diego, CA  
Sowmya Katragadda, M.B.B.S., Temple, TX

Husam Kayyali, M.D., Overland Park, KS  
Marissa Anne Kellogg, M.D., Portland, OR  
Kristen Kelly-Williams, M.D., Apple Valley, MN  
Daniel Lewis Kenney-Jung, M.D., Rochester, MN  
Karen Cecilia Keough, M.D., Austin, TX  
Sotirios Tony Keros, M.D., PhD, New York, NY  
Inna Keselman, M.D. PhD, Long Beach, CA  
Fawad Ahmed Khan, M.D., Kenner, LA  
Nadir Khan, M.B.B.S., Franksville, WI  
James Jong Kim, M.D., Los Angeles, CA  
Paul Douglas Knowles, M.D., Huntington, WV  
Kalyani Korabathina, M.D., Tampa, FL  
Prakash Kotagal, M.D., University Heights, OH  
Sanjeev Vithal Kothare, M.D., Syosset, NY  
Olga Geniyevna Kozlova, M.D., Glenview, IL  
Chandrashekar Krishnaswamy, M.D., Hazard, KY  
Gogi Kumar, M.D., Dayton, OH  
Shilpi Kumar, M.D., Dayton, OH  
Meghna Kumar-Pelayo, M.D., Seminole, FL  
Paulina Justyna Kunecka, M.D., West Fargo, ND  
Nathan Kung, M.D., Saint Louis, MO  
Olgica Laban-Grant, M.D., Harrison, NY  
Ikuko Laccheo, M.D., Williamsburg, VA  
Terrence Daniel Lagerlund, M.D., Ph.D., Rochester, MN  
Andre Lagrange, M.D., Ph.D., Nashville, TN  
Alice Lam, M.D., Cambridge, MA  
Suzette Maria LaRoche, M.D., Asheville, NC  
Ma Emma Cecilia Laureta, M.D., Fresh Meadows, NY  
Scheherazade Traghis Le, M.D., Palo Alto, CA



Chon Lee, M.D., Chapel Hill, NC  
David Jin Lee, M.D., San Diego, CA  
Ki-Hyeong Lee, M.D., Orlando, FL  
Marcus W Lee, M.D., Flowood, MS  
Christopher William Lee-Messer, M.D., Ph.D., San Jose, CA  
Tracy L Levy, D.O., Downingtown, PA  
Ping Li, M.D., Williamsville, NY  
Xiangping Li, M.D., Galveston, TX  
William Edward Lievens, M.D., Montgomery, AL  
Jack Jian Lin, M.D., Irvine, CA  
Avriel Sara Linane, D.O., Huntington Beach, CA  
Tobias Loddenkemper, M.D., Natick, MA  
Joshua David Loeb, M.D., Claremont, CA  
Rafael Jose Lopez Baquero, M.D., Cayey, PR  
Andrea Raphiela Lowden, M.D., Dallas, TX  
Daniel Bryan Lowenstein, M.D., New York, NY  
Jennifer Kathryn Lynch, M.D., Springfield, MO  
Edward Hueitai Maa, M.D., Denver, CO  
Luigi Maccotta, M.D., Ph.D., Ballwin, MO  
Jane MacLean, M.D., Fremont, CA  
Deepak Madhavan, M.D., Omaha, NE  
Naeem Mahfooz, M.B.B.S., University Heights, OH  
Prerna Malla, M.B.B.S, Washington, DC  
Louis Manganas, M.D., Ph.D., Setauket, NY  
Atul Mangla, M.B.B.S., Kalamazoo, MI  
Ahmad Marashly, M.D., Milwaukee, WI  
Belinda Oyinkan Marquis, M.D., Brooklyn, NY  
Amy Martyanov, M.D., Skandia, MI  
Todd Simon Masel, M.D., Galveston, TX

Shavonne Massey, M.D., Sicklerville, NJ  
Sally V Mathias, M.B.B.S., Lexington, KY  
Douglas Maus, M.D., Ph.D., Boston, MA  
Alison May, M.D., New York, NY  
Danielle Kenda McBrian, M.D., Cedar Grove, NJ  
Paul Henry McCabe, M.D., Wyoming, PA  
Thomas Drake McDonald, M.D., Colorado Springs, CO  
Pamela Pojomovsky McDonnell, M.D., Merion Station, PA  
Tiffani Leigh McDonough, M.D., New York, NY  
Leslie S. McDougall, D.O., Port Matilda, PA  
Emily McGinnis, M.D., Los Angeles, CA  
Nancy McNamara, M.D., Novi, MI  
Maggie Lynn McNulty, M.D., Chicago, IL  
Tresa Diane McSween, M.D., Queens Village, NY  
John William Miller, M.D., Ph.D., Seattle, WA  
John Joseph Millichap, M.D., Chicago, IL  
Daniela Nicola Minecan, M.D., Ann Arbor, MI  
Scott Evan Mintzer, M.D., Ardmore, PA  
Monika Mishra, MD, Albuquerque, NM  
Amber Mitchell, M.D., Kingston, NY  
Lilit Mnatsakanyan, M.D., Orange, CA  
Priya Alexandra Monrad, M.D., Milwaukee, WI  
Sameh Serry Wasfy Morkous, M.D., Kingston, PA  
Christelle Moufawad El Achkar, M.D., Boston, MA  
Ali Mohamad Moussaoui, M.D., Webster, TX  
Andrew Irving Mower, M.D., Orange, CA  
Wolfgang Gerhard Muhlhofer, M.D., Birmingham, AL  
Najib I Murr, M.D., Springfield, IL  
Anthony Michael Murro, M.D., Martinez, GA

Krishna Chaitanya Mylavarapu, M.D., Little Rock, AR  
Mangala Avadhoot Nadkarni, M.D., Edison, NJ  
Ahsan Moosa Naduvil Valappil, M.D., Solon, OH  
Keith Joseph Nagle, M.D., Burlington, VT  
Puja Naik, M.D., Miami, FL  
Srishti Nangia, M.D., Manhasset, NY  
Aditi Pradeep Narechania, M.D., Chicago, IL  
Dean K. Naritoku, M.D., Mobile, AL  
Gunjan Narwani, M.D., Warren, MI  
Aaron Lane Alexander Nelson, M.D., New York, NY  
Michael Nissenbaum, M.D., Great Neck, NY  
Douglas Ray Nordli Jr., M.D., Los Angeles, CA  
Ika Noviawaty, M.D., Foxboro, MA  
Adam Numis, M.D., San Francisco, CA  
Chantal Maureen O'Brien, M.D., Aurora, CO  
Sunila E. O'Connor, M.D., Shorewood, WI  
Cormac Alvin O'Donovan, M.D., Winston Salem, NC  
Rebecca O'Dwyer, M.D., Chicago, IL  
Juan Gonzalo Ochoa, M.D., Mobile, AL  
Roger Oghlakian, M.D., Ozark, MO  
Nwanneka Adoma Okolo, M.D., Brooklyn, NY  
Sowmini Kochumman Oommen, M.D., Franklin, TN  
Brian Samuel Oommen, M.D., Downingtown, PA  
Adam Ostendorf, M.D., Columbus, OH  
Mohammad Omar Khalil Owais, M.B.B.S., Fort Smith, AR  
James Wyche Manier Owens, M.D., Ph.D., Shoreline, WA  
Dipakkumar Pravinchandra Pandya, M.D., Edison, NJ  
Palak D Parikh, M.D., MILL CREEK, WA  
Sima A Parikh, M.D., Fort Lauderdale, FL

David Park, D.O., Wynnewood, PA  
Esmeralda Llanas Park, M.D., Arlington Heights, IL  
Colette Cutrer Parker, M.D., Jackson, MS  
Christopher Parres, M.D., Bloomfield Hills, MI  
Josef Parvizi, M.D., Ph.D., Palo Alto, CA  
Puja Patel, M.D., New York, NY  
Christina Marie Patterson, M.D., Wexford, PA  
Milena K. Pavlova, M.D., Watertown, MA  
Kailash Tulshiram Pawar, M.D., Leawood, KS  
Nigel Paul Pedersen, M.B.B.S., Atlanta, GA  
Alyssa Dara Pensirikul, M.D., Coral Gables, FL  
Ghazala Perven, M.D., Dallas, TX  
Jurriaan M. Peters, M.D., Boston, MA  
Brian W Peterson, M.D., Metairie, LA  
Donald John Phillips, M.D., Birmingham, MI  
Chalongchai Phitsanu Wong, M.D., Chicago, IL  
Juan Andres Piantino, M.D., Lake Oswego, OR  
Anna Ribeiro Pinto, MD, Andover, MA  
John Robert Pollard, M.D., Wallingford, PA  
Anca Simona Popescu, M.D., Cherry Hill, NJ  
Gautam Sidharath Singh Popli, M.D., Lewisville, NC  
Brenda Elaine Porter, M.D., San Carlos, CA  
Jennifer Marie Pritchard, M.D., Elkridge, MD  
Simona Vasilica Proteasa, M.D., Brooklyn NY, NY  
Vineet Punia, M.D., Cleveland Heights, OH  
Preeti Vasant Puntambekar, M.D., Livingston, NJ  
Swapna Putta, M.B.B.S., Quincy, MA  
Imran Quraishi, M.D., Ph.D., New Haven, CT  
Vijayalakshmi Rajasekaran, M.D., Morgantown, WV

Darwin G Ramirez Abreu, MD, Springfield, MO  
Nishi Rampal, M.D., Branford, CT  
R Eugene Ramsay, M.D., New Orleans, LA  
Stephanie Carapetian Randle, M.D., Seattle, WA  
Lekha Matsumori Rao, M.D., Los Angeles, CA  
Samiya Rashid, D.O., San Antonio, TX  
Jigar Maheshkumar Rathod, M.D., Gilbert, AZ  
Margie Ann Ream, M.D., Westerville, OH  
Shilpa B Reddy, M.D., Nashville, TN  
Chrystal Reed, M.D., Los Angeles, CA  
Aylin Yasmin Reid, M.D. PhD, Toronto, ON  
Alexandra Reznikov, M.D., Valley Stream, NY  
Ramses Ribot, M.D., Miami, FL  
Candice Waked Riggeal, D.O., Jacksonville, FL  
Stephanie Ann Robinett, M.D., Charlotte, NC  
Alcibiades Jacinto Rodriguez, M.D., Long Island City, NY  
Gerardo David Rodriguez-Gomez, M.D., Reno, NV  
Lubov F Romantseva, M.D., Chicago, IL  
Sandra Lynn Rose, M.D., Chicago, IL  
Meridith Ann Runke, M.D., Zionsville, IN  
Mohammadreza Sadeghi, M.D., Bellaire, TX  
Rup Kamal Sainju, M.B.B.S, Iowa City, IA  
Chutima Saipetch, M.D., Bangkok, Bangkok  
Sumaiya Z. Salim, M.D., Hilliard, OH  
Salomi Trupti Salins, M.B.B.S., Yukon, OK  
Delphin Sallowm, M.D., Rancho Cucamonga, CA  
Alana Elizabeth Salvucci, D.O., Swarthmore, PA  
Debopam Samanta, M.D., Little Rock, AR  
Ana Maria Sanchez, M.D., Baltimore, MD

Russell Patrick Saneto, D.O., Ph.D., Brier, WA  
Dean Sarco, M.D., Los Angeles, CA  
Shirish Satpute, D.O., Houston, TX  
Chad Saunders, M.D., Emmaus, PA  
Daniel Ignacio Schere, M.D., Austin, TX  
Mark Schomer, M.D., Farmington, CT  
John Michael Schreiber, M.D., Bethesda, MD  
Courtney Schusse, M.D., Phoenix, AZ  
Erica Ann Schuyler, M.D., Hartford, CT  
Laurie Eileen Seltzer, D.O., Pittsford, NY  
Elaine Seto, M.D., Houston, TX  
Christopher R. Shafer, M.D., Shelbyville, KY  
Aashit K. Shah, M.D., Detroit, MI  
Deepal Jinal Shah, M.B.B.S., College Station, TX  
Dharmen Subodhchandra Shah, M.D., Mooresville, NC  
Palak Saurabh Shah, M.D., Minneapolis, MN  
Asim Mohammad Shahid, M.D., Beachwood, OH  
Gregory Baker Sharp, M.D., Little Rock, AR  
Renee Adele Shellhaas, M.D., M.S., Ann Arbor, MI  
Raj Dilip Sheth, M.D., Jacksonville, FL  
Rosita Sadhana Shivdat-Nanhoe, M.D., Lizella, GA  
Daniel Walter Shrey, M.D., Irvine, CA  
Thitiwan Simasathien, M.D., Bangkok, Bangkok  
David John Sinclair, M.D., Panama City, FL  
Rani Kaur Singh, M.D., Harrisburg, NC  
Jeremy Daniel Slater, M.D., Houston, TX  
Douglas Michael Smith, M.D., Saint Paul, MN  
Elson Lee So, M.D., Rochester, MN  
Mehdi Soltani, M.D., Baton Rouge, LA

Luda Mila Sorin, M.D., Chicago, IL  
Veronica Sosa, M.D., Milwaukee, WI  
Deepa Soundara Rajan, M.D., Sewickley, PA  
Emily Mathews Spelbrink, M.D., Ph.D., Belmont, CA  
Mary Spiciarich, M.D., Eastchester, NY  
Rebecca Spiegel, M.D., East Setauket, NY  
Channaiah Srikanth Mysore, M.D., Salisbury, MD  
Karen Mary Stannard, M.D., Worcester, MA  
Maria Stefanidou, M.D., Boston, MA  
Diane Marie Stein, M.D., Irvine, CA  
Scott Jordan Stevens, M.D., Manhasset, NY  
Andrey Sasha Stojic, M.D., Ph.D., Bay Village, OH  
Aaron Struck, M.D., Middleton, WI  
Joseph Edgar Sullivan III, M.D., Larkspur, CA  
Joanna Suski, M.D., Stoneham, MA  
Bernhard Suter, M.D., Houston, TX  
Jerzy Pawel Szaflarski, M.D., Ph.D., Birmingham, AL  
Jennifer M Takesaka, M.D., Dallas, TX  
Adriana S. Tanner, M.D., Grand Rapids, MI  
James Xiang Tao, M.D., Ph.D., Chicago, IL  
Olha Taraschenko, M.D., Omaha, NE  
Janet Buonocore Teodori, M.D., Tucson, AZ  
Sreenath Thati Ganganna, M.B.B.S., Ypsilanti, MI  
Ronald Laurent Thibert, D.O., Bridgewater, MA  
Drew Michael Thodeson, M.D., Dallas, TX  
Ashley E Thomas, M.D., Vestavia, AL  
Melissa Susan Thomas, M.D., Houston, TX  
Stephen Arthur Thompson, M.D., Houston, TX  
Benjamin Tolchin, M.D., Brookline, MA

Fumin Tong, M.D., Glen Rock, NJ  
Diego Felipe Tovar Quiroga, M.D., Austin, TX  
Ching Tsao, M.D., Maplewood, NJ  
Philip Tseng, M.D., Redlands, CA  
Krikor Tufenkjian, M.D., Philadelphia, PA  
Ambica Manjunath Tumkur, M.D., Tampa, FL  
Evelyn Charlette Tunnell, M.D., Madison, WI  
Monika Ummat, M.D., Houston, TX  
Mian Zain Ul Sajadeen Urfy, M.D., Overland Park, KS  
Michele Marie Van Hirtum-Das, M.D., Sherman Oaks, CA  
Colin Van Hook, M.D., New Orleans, LA  
Katherine Cyran Van Poppel, M.D., Concord, NC  
Lines Marie Vargas Collado, MD, Leawood, KS  
Alpa Vashist, M.D., Clarksville, MD  
Antonio Vazquez-Diaz, M.D., Tampa, FL  
Hector Hugo Velez-Camacho, M.D., Tampa, FL  
Lawrence Wouter Ver Hoef, M.D., Birmingham, AL  
Danilo Vitorovic, M.D., Williston, VT  
Paula Emanuela Voinescu, M.D., Boston, MA  
Gretchen Von Allmen, M.D., Houston, TX  
Ashish Atulbhai Vyas, M.D., Montgomery, AL  
Binod Wagle, M.B.B.S., Overland park, KS  
Mervat Nasry Wahba, M.D., Memphis, TN  
Adam Donald Wallace, M.D., Rochester, MN  
Diana Joan Walleigh, M.D., Aurora, CO  
Huijun Wang, M.B., Middletown, DE  
JingTian Wang, M.D., Ph.D., Glendale, CA  
Lawrence Chao-ping Wang, M.D., Colorado Spgs, CO  
Lei Wang, M.D. Ph.D, Southlake, TX



Yu Wang, M.D., Ph.D., Ann Arbor, MI

Daniel James Weber, D.O., Jamaica Plain, MA

Judith Leona Zwiebel Weisenberg, M.D., Chesterfield, MO

Mary Ann Werz, M.D., Ph.D., Sauk City, WI

David Brockman Wheeler, M.D., Ph.D., Casper, WY

Andrew Malcolm White, M.D., Aurora, CO

Frank Jefferson Williams, MD, Gretna, LA

Shawniqua Williams, M.D., Conshohocken, PA

Virginia Erin Walton Willis, M.D., Little Rock, AR

Brian Wolf, M.D., Coral Gables, FL

Matthew Harry Wong, M.D., Charlottesville, NC

Victoria San San Wong, M.D., Honolulu, HI

Shasha Wu, M.D., Ph.D., Chicago, IL

Sisira Yadala, M.D., Cape Girardeau, MO

Hong Yu, M.D., Brookline, MA

Naoir Zaher, M.D., pittsburgh, PA

Reza Zarnegar, D.O., New York, NY

Luis E Zayas, M.D., Quincy, IL

Rodrigo Zepeda Garcia, M.D., Dallas, TX

Guojun Zhang, M.D., Manlius, NY

Ning Zhong, M.D., Albany, CA

Xiangping Zhou, M.D., Columbia, MO

Peimin Zhu, MD, PhD, Shreveport, LA

Pantea Zohrevand, M.D., Rancho Cucamonga, CA

Sarah Zubkov, M.D., Jenkintown, PA

Deepti Zutshi, M.D., Troy, MI

**FP Maintenance of Certification, July 1, 2016**

Gerald Alan Shiener, M.D., Birmingham, MI

**FP Maintenance of Certification, April 18, 2016**

Phyllis Esther Amabile, M.D., Chicago, IL  
Gary Edward Beven, M.D., Friendswood, TX  
Gerald Irwin Busch, M.D., Houston, TX  
Brendan Thomas More Carroll, M.D., W Jefferson, OH  
John Robert Chamberlain, M.D., Foster City, CA  
Conrad H. Daum, M.D., Roanoke, VA  
Mitchell Harold Dunn, M.D., Dallas, TX  
David Mark Gellerman, M.D., Ph.D., El Dorado Hills, CA  
Maureen Hackett, M.D., Minnetonka, MN  
Kathryn Colby Hall, M.D., Seattle, WA  
Bruce Edgar Harry, M.D., Columbia, MO  
Diane Edwards Heisel, M.D., Chelsea, MI  
Stafford Christopher Henry, M.D., Chicago, IL  
Edward Richard Herman, M.D., Scarsdale, NY  
Virginia Lee Hill, M.D., Anaconda, MT  
Rory Philip Houghtalen, M.D., Rochester, NY  
George E. Kalousek, M.D., Westminster, CO  
Steven Alphonso King, M.D., Warren, OH  
Barry H. Klegman, M.D., Boston, MA  
Andrew Paul Levin, M.D., Hartsdale, NY  
Charles Joseph LoPiccolo, M.D., Lauderdale By The Sea, FL  
Carl P. Malmquist, M.D., Minneapolis, MN  
Rajendrasinh P. Mangrola, M.D., Jupiter, FL  
Stephen Paul Manlove, M.D., Rapid City, SD  
Anthony Joseph Marchlewski, M.D., Green Bay, WI  
Mary Kathleen Matthews, M.D., Denver, CO  
Mark Richard McClung, M.D., Seattle, WA

Kevin Dale Moore, M.D., Stafford, VA  
Todd Elliott Moore, M.D., Ann Arbor, MI  
David Moron, M.D., Harlingen, TX  
Stephen George Noffsinger, M.D., Hudson, OH  
Brooke Snowden Parish, M.D., Albuquerque, NM  
Gregory Paul, M.D., Austin, TX  
Debra Anne Pinals, M.D., Ann Arbor, MI  
Gary Ray Proctor, M.D., Ponte Vedra Beach, FL  
Jorge Arnaldo Raichman, M.D., Houston, TX  
Fabian M. Saleh, M.D., Boston, MA  
Charles Leon Scott, M.D., San Francisco, CA  
Stephen Warner Siebert, M.D., Towson, MD  
Karl Gregory Sieg, M.D., Winter Park, FL  
Rajendra Pratap Singh, M.D., Pittsford, NY  
Kishore Julian Thampy, M.D., St Augustine, FL  
Rajam Theventhiran, M.D., Staten Island, NY  
Scott Alan Turpin, M.D., Berkeley, CA  
Barry Wayne Wall, M.D., Providence, RI  
Eugene Wang, M.D., Vancouver, BC  
Pamela Jean Wright-Etter, M.D., Charlotte, NC  
Sean Hearn Yutzy, M.D., Tallahassee, FL

**GP Certification, October 17, 2016**

Arin Abnoosian, M.D., La Crescenta, CA  
Noman Afzal, M.D., Katy, TX  
Radha Gayatri Agepati, M.D., Ashburn, VA  
Nicole Frances Aho, M.D., Huntersville, NC  
Marieliz Veronica Alonso Calderon, M.D., New York, NY  
Adeel Ansari, M.B.B.S., San Antonio, TX

Paulo Renato De Araujo Valle Correa, M.D., Cromwell, CT

Alexis Diane Armenakis, M.D., San Francisco, CA

David Matthew Atkinson, M.D., Minneapolis, MN

Gayle Yvonne Ayers, D.O., Austin, TX

Kumar Deepak Bahl, M.D., Leesburg, VA

Moni Baidya, M.D., Charlottesville, VA

Sabish Balan, M.D., New York, NY

Irina Baranskaya, M.D., Edmond, OK

Arnabh Basu, M.B.B.S., Rahway, NJ

Kyle Joseph Bechaz, M.D., Los Angeles, CA

Carla Bejjani, M.D., Houston, TX

Sophiya Benjamin, M.D., Kitchener, ON

Atit Bhattachan, M.B.B.S., W. Columbia, SC

Abesh Kumar Bhattacharjee, M.B.B.S., La Jolla, CA

Emily Bomasang-Layno, M.D., Ellicott City, MD

Yara Angelica Bonet Pagan, M.D., Haines City, FL

Dasen Brajkovic, M.D., Harrington Park, NJ

Victoria Louise Brown-Nyseth, M.D., Plymouth, MN

Vladimir Anatolyevich Brown-Zheltkov, M.D., Covington, VA

Chevelle Sabrina Hadassah Brudey, M.D., Dallas, TX

Abdul Qadir Brula, M.D., Schenectady, NY

Jack Castro, M.D., Bronx, NY

Umesh Chander Rao Chakunta, M.D., Asbury, IA

Kathryn Chen, M.D., Seattle, WA

Li Chu, M.D., Toronto, ON

Hope I Cohen Webb, D.O., Florence, SC

Virginia Tuliao Corpuz-Zabala, M.D., El Dorado Hills, CA

Cameron Blake Culver, M.D., Dallas, TX

Sidiki Dabo, M.D., New York, NY

David Abolarin Dada, M.D., Ocala, FL  
Mohammed Hasan Daher, M.D., Stockton, CA  
Tapsi Dayanand, M.B.B.S., Brookline, MA  
Romika Dhar, M.B.B.S., Morgantown, WV  
Shanna Diaz, D.O., Albuquerque, NM  
Taly Drimer-Kagan, M.D., Mt.Juliet, TN  
Robert Higgins Ebert II, M.D., Little Rock, AR  
Henry Emerle, M.D., Davenport, IA  
Mervat Estefanos, M.D., Largo, FL  
Sabeen Faris, M.D., Greencastle, PA  
Caralyn Jean Floyd, DO, Orange, TX  
Shannon Christine Ford, M.D., El Paso, TX  
Candace Fraser, D.O., New Kensington, PA  
Albert Gerard Galante, M.D., Wayne, NJ  
Jennifer Rose Gatchel, M.D., Boston, MA  
Marie Anne Gebara, M.D., Pittsburgh, PA  
Javed Ghani, M.D., Saint James, NY  
Katherine Rice Goettsche, M.D., New York, NY  
Monica Teresa Peterson Gordon, M.D., Murrieta, CA  
Gopinath Gorthy, MD, Saint Louis, MO  
Jose Armando Guerra-Valencia, M.D., South Miami, FL  
Allison Evans Gullo, M.D., West Linn, OR  
Amy R. Halt, M.D., Ph.D., Bristol, RI  
Georges Antoine Hneich, MD, Greenville, SC  
Wei Hu, M.D., Warrenville, IL  
Erika Katherine Jakobson, D.O., Bayville, NY  
Meera Joseph, M.D., West Palm Beach, FL  
Renz Jarrett Juaneza, M.D., Columbia, MD  
Sanjeev Madhav Kamat, M.D., Saint Louis, MO

Kurtis Sachio Kaminishi, M.D., San Francisco, CA  
Mary Elizabeth Kelleher, M.D., South Orange, NJ  
Rachel Suzanne Kester, D.O., Somerville, MA  
Eitan Kimchi, M.D., Evanston, IL  
Aaron M Koenig, M.D., Newton, MA  
Rushiraj Chaitanya Laiwala, M.D., Blythewood, SC  
Mary K. Lajoy, M.D., Portland, OR  
Khris S. Lampon Torres, M.D., Mayaguez, PR  
Hoa Thuan Le, D.O., Jefferson, LA  
Khoi Le, M.D., Westminster, CA  
Christi Lorraine Leach, M.D., Tampa, FL  
Ellen Eun-Ok Lee, M.D., San Diego, CA  
Jung In Lee, M.D., Edina, MN  
Katherine Mariann Groh Levine, M.D., Fox Point, WI  
John Robert Magera, M.D., Pinehurst, NC  
Natalia Markova, D.O., New York, NY  
Laura Francesca Marrone, M.D., San Diego, CA  
Lady Aura Martinez Fernandez, M.D., San Antonio, TX  
Kristin Desiree McArthur, M.D., Chapel Hill, NC  
Vanessa Angela McDonald, D.O., PORTLAND, OR  
Abhishek Mehra, M.D., Downingtown, PA  
Eeva Mikkola, M.D., east elmhurst, NY  
Niaz Mohammad, M.D., Portage, MI  
Lori Shizuko Murayama-Sung, M.D., Honolulu, HI  
Padmapriya Musunuri, M.B.B.S., Warrington, PA  
Bhusan Neupane, M.D., Salem, VA  
Leo Osaretin Noragbon, M.D., Stockbridge, GA  
Anne Grace Stephanie N. Pascual, M.D., Monterey, CA  
Willy Philiias, M.D., Riviera Beach, FL

Uyen-Khanh Quang-Dang, M.D., Palo Alto, CA  
Swapnil Rajan Rath, M.B.B.S., West Bloomfield, MI  
Michael M Reinhardt Jr., M.D., Brooklyn, NY  
Lina Maria Reyes, M.D., Fort Lauderdale, FL  
Maria Margarita Reyes, M.D., Sandy, UT  
Harvey W. Rice, M.D., Englewood, NJ  
Meghan C Riddle, M.D., Nashville, TN  
Janice A Rios Loubriel, M.D., Miami, FL  
Leonardo Rodriguez, M.D., Gainesville, FL  
Helen Hyun Ryu, M.D., Charles Town, WV  
Yauss Safavi, M.D., Woodbridge, CT  
Adharsh Pravid Sahadevan, M.D., Clarks Green, PA  
Ricardo Salazar, M.D., EL PASO, TX  
Joseph John Schumacher, M.D., Denver, CO  
Chintan Shah, M.D., Toronto, ON  
Aaron Short, M.D., Houston, TX  
Pedro Benjamin Simpson, M.D., Albuquerque, NM  
Apolonia Sinu, M.D., Sewickley, PA  
Erica Elizabeth Smolcic, M.D., Pittsburgh, PA  
Caitlin Snow, M.D., New York, NY  
Kim Elaine Soden, M.D., Ann Arbor, MI  
Anothai Soonsawat, M.D., Palo Alto, CA  
Giulia Sorrentino, M.D., Massapequa, NY  
Bishnu Prasad Subedi, M.D., Farmington, MO  
Sandarsh Surya, M.B.B.S., Augusta, GA  
Fahd Ahmed Syed, M.D., Rochester Hills, MI  
Nickolas Kyriakos Toggias, M.D., Binghamton, NY  
Mirela E Toma-Opruta, M.D., Ridgewood, NY  
Viktoria Toth, M.D., Roslyn Heights, NY

Kalya Vardi, M.D., San Diego, CA

Daniel Varon, M.D., Pittsburgh, PA

Maria Varvara, M.D., New York, NY

Jessica L. Warner, M.D., Highlands Ranch, CO

William Lee Whiting, D.O., Tampa, FL

Mary Kathleen Wilber, D.O., Arlington, MA

Stephen Alexander Wilkes, M.D., Cleves, OH

John Wilson, M.D., Portland, OR

Joshua Aaron Woolley, M.D., Little Rock, AR

Audra Yadack, M.D., Oklahoma City, OK

Elmira Tulegenova Yessengaliyeva, M.D., Kalamazoo, MI

Erin Zahradnik, M.D., Chicago, IL

Manish Zinzuvadia, M.D., New York, NY

Olivia S. Zurek, M.D., Cambridge, MA

**GP Maintenance of Certification, July 1, 2016**

Juliana Melody Fort, M.D., Shreveport, LA

Badalin Helvink, M.D., Encinitas, CA

**GP Maintenance of Certification, April 18, 2016**

Clint Wayne Anthony, M.D., Prescott, AZ

Mary Elizabeth Barkalow, M.D., Newton Highlands, MA

David Allen Beck, M.D., Saint Louis, MO

Mary Carol Blazek, M.D., Ann Arbor, MI

Debra Anderson Bolick, M.D., Hickory, NC

Iveta Boyancheck, M.D., Columbus, GA

Hector Fabio Britto, M.D., Wellington, FL

Mark Alan Burns, M.D., New Braunfels, TX

Jeffrey Michael Burock, M.D., Warren, RI



Francis Kevin Butler, M.D., Safety Harbor, FL  
Donna J. Carmosky, M.D., Haymarket, VA  
Sam Leon Carson, M.D., Rydal, PA  
Umapathy Channamalappa, M.D., Oakmont, PA  
Nicoleta Coconcea, M.D., Greenville, DE  
Yasmin Marie Collazo, M.D., Ny, NY  
Christopher Anthony D'Agostino, D.O., South Elgin, IL  
Watantrige Takshan De Alwis, M.D., Alpine, NJ  
Elsy Antony Devassy, M.D., Lockport, IL  
David James Diehl, M.D., Saline, MI  
Ellen Fan, M.D., Plano, TX  
Howard H. Fenn, M.D., Palo Alto, CA  
Joseph Frederick Fickes, M.D., Fairfield, CT  
William Robert Flynn, M.D., Pleasant Hill, CA  
Cheryl A. France, M.D., Hobe Sound, FL  
Pierre Lesly Francois, M.D., Centereach, NY  
Frank Alan Germano, M.D., Eagle, ID  
Muhammad Rehan Ghani, M.D., Paramus, NJ  
William John Giakas, M.D., Rockford, IL  
Michael Alan Glasser, M.D., Potomac, MD  
Jeffrey Stuart Gold, M.D., Massapequa Pk, NY  
Adam Jonathan Goodman, M.D., Allentown, PA  
Joseph S. Goveas, M.D., Menomonee Falls, WI  
Maria Del Rosario Grau, M.D., Eden Prairie, MN  
Vonda Kay Gravely, M.D., Moore, SC  
Gary Arthur Grove, M.D., Scottsdale, AZ  
Harry E. Gwirtsman, M.D., Nashville, TN  
David S. Harnett, M.D., Brookline, MA  
Beverly Nicholas Jones III, M.D., Winston Salem, NC

Timothy Michael Juergens, M.D., Madison, WI

Neil Andrew Kahn, M.D., Decatur, GA

John William Kasckow, M.D., Daniels, WV

Ethan Ben Kass, D.O., M.B.A., Coral Springs, FL

Christen McCullough Kerr, M.D., Mc Lean, VA

Keith Bradford Kessel, M.D., Fort Worth, TX

Philippe John Khouri, M.D., Princeton, NJ

Daniel Young-Joong Kim, M.D., Chicago, IL

Kye Y. Kim, M.D., Roanoke, VA

Ruth Kohen, M.D., Mercer Island, WA

Mark Edward Kremen, M.D., Omaha, NE

Patricia Gallagher Lapkin, M.D., Grand Junction, CO

Jill Lynette Liesveld, M.D., Coralville, IA

Laura Marsh, M.D., Houston, TX

Mohammed Amin Memon, M.D., Moore, SC

Arvin Lloyd Mirow, M.D., San Marcos, CA

Nadeem Mohammad Mirza, M.B.B.S., Portage, MI

Satyajit Mukherjee, M.D., Mechanicsburg, PA

Swati Shirish Mulay, M.D., Roseville, CA

China Krishna Murthy Murali, M.D., Saint Louis, MO

Kevin LaBran Murphy, M.D., Fort Wayne, IN

Shajitha Nawaz, M.D., San Marcos, CA

Aurelian Nicolae Niculescu, M.D., Pittsford, NY

John Westbrook Norton, M.D., Madison, MS

Sabiha Jabeen Omar, M.D., West Bloomfield, MI

Rina Ankur Patel, M.D., Mequon, WI

Lilium Perez, M.D., Monterey, CA

Kerry Lee Pierce, M.D., Midland, MI

Manish Prasad, M.D., Ann Arbor, MI

Kamal Khan Raisani, M.D., Tuscaloosa, AL

Manzar Yousuf Rajput, M.D., Jackson, MI

Dharmindra Ramaiya, M.D., Gilbert, AZ

Christopher Scott Randolph, M.D., Anniston, AL

Anusha Ranganathan, M.D., Ann Arbor, MI

Steven C. Samuels, M.D., Ridgewood, NJ

Adnan Sarcevic, M.D., Dix Hills, NY

David Anthony Scola, M.D., Manitou Springs, CO

Andreea L. Seritan, M.D., San Francisco, CA

Gerald Alan Shiener, M.D., Birmingham, MI

Farhad Sholevar, M.D., Allentown, PA

Sidney Kendrick Smith III, M.D., Metairie, LA

Patrick William Stang, M.D., Great Bend, KS

Robert Lee Steinberg, M.D., Boca Raton, FL

John Gregory Tierney, M.D., San Antonio, TX

David Martone Tobolowsky, M.D., Miami, FL

Alfredo Espiritu Torres, M.D., Monroe, LA

Patrick Todd Triplett, M.D., Baltimore, MD

Hai Cheng Tsao, M.D., Fredericktown, PA

Rajeshree Tulloo, M.D., Salisbury, NC

Alan David Valentine, M.D., Houston, TX

Sanjay Maniklal Vaswani, M.D., Fullerton, CA

Rebecca Helen Warner, M.D., Auburndale, MA

Charles Steven Wasserman, M.D., Chelmsford, MA

Lea Corinne Watson, M.D., Denver, CO

Steven Phillip Wengel, M.D., Omaha, NE

Perry Scott Westerman, M.D., Kalamazoo, MI

John B. White, M.D., Tulsa, OK

Mark Timothy Wolf, M.D., Spokane, WA

Albert Bing-Ru Wu, M.D., Princeton Junction, NJ

Marc Howard Zisselman, M.D., Annapolis, MD

**Psychiatry Certification, September 22, 2016**

Mekabiz Abaian, M.D., Corona, CA

Karim Abbas, M.D., Fayetteville, NC

Ahmed Abdel-Raouf, M.B.Ch.B., Atlanta, GA

Nataliya Alexandrovna Ables, D.O., San Antonio, TX

Siramene Abraham, M.D., Miami, FL

Tiffany Maayeh Abtahi, M.D., Dallas, TX

Constantin Abuzatoaie, M.D., Melrose Park, IL

Uchenna Achebe, M.D., Baltimore, MD

Stephanie Achilles, M.D., East Syracuse, NY

Joshua Robert Ackerman, MD, Pennington, NJ

Suselina Herminia Acosta, M.D., Dallas, TX

Caitlin Adams, M.D., Boston, MA

Kathrine Elowe Adams, DO, Fort Lauderdale, FL

Kathryn M Adams, M.D., Wylie, TX

Michael Joseph Adelman, M.D., Chapel Hill, NC

Isabella O Adjinah, D.O., Columbia, SC

Laura Adler, M.D., El Paso, TX

Crispa Aeschbach-Jachmann, M.D., Austin, TX

Vladislav Afanasevich, M.D., Sacramento, CA

Maloe Chu Affuembey, M.D., Lilburn, GA

Fariha Afzal, M.B.B.S., Norman, OK

Mawuena M. Agbonyitor, M.D., Dallas, TX

Erum Pasha Ahmad, M.D., Westlake, OH

Sufian Ahmad, M.D., Prospect, KY

Uzma Ahmad, M.B.B.S., Plano, TX

Farah Ahmad-Stout, M.D., Philadelphia, PA  
Naser Ahmadi, M.D., Culver City, CA  
Nahida Nayaz Ahmed, M.B.B.S., Abu Dhabi, AD  
Nazia Ahmed, M.D., Tucson, AZ  
Hee-Jun Ahn, M.D., Everett, MA  
Tolani Ajagbe, M.B.B.S., Syracuse, NY  
Nasreen Akbar, M.D., New York, NY  
Naeem Akhtar, M.D., Lexington, KY  
Mohamad Al-Rashdan, MD, Paramus, NJ  
Saima Alam, MD, Sugar Land, TX  
Salmahn Ahmed Alam, M.D., Vestal, NY  
Bandar Aqeel M AlAqeel, MBBS, Riyadh, Riyadh  
Rania Mohammed Albeshar, M.D., Medford, MA  
Brittany B Albright, M.D., Sullivan's Island, SC  
Shuliweeh Menwer R Alenezi, MBBS, Ottawa, ON  
Suresh Mathew Alexander, M.D., Jackson, MS  
Arshad Ali, M.D., New York, NY  
Yusuf Ali, M.D., Atlanta, GA  
Sabitha Aligeti, M.B.B.S., Elgin, SC  
Andrew Alkis, M.D., Fairfax, VA  
Steven Allen, M.D., Highland, CA  
Nemer Almosyab, MBBS, Alahsa, Eastern Province  
Yaima Alonso-Jeckell, M.D., Nashville, TN  
Basem Alsarraj, M.D., Fort Wayne, IN  
Carla I Alvarado, M.D., El Paso, TX  
Naomi Ambalu, D.O., Morganville, NJ  
Shelley Amen, M.D., Ph.D., North Haven, CT  
Jin Amon, M.D., Owensboro, KY  
Ameya Amritwar, M.B.B.S., Arlington, VA

Benjamin James Anderson, M.D., Washington, DC  
Michael Edward Anderson, MD, Warner Robins, GA  
Odette Adean Anderson, M.D., Middleton, WI  
Tana Andre, D.O., Ridley Park, PA  
Sarah Ramsay Andrews, M.D., Baltimore, MD  
Joalex L Antongiorgi Torres, M.D., San Juan, PR  
Rita Michel Aouad, M.D., Columbus, OH  
Ahmad Yaseen Arain, M.B.B.S., Dallas, TX  
Elisha Claire Arata, M.D., Saint Paul, MN  
Jacqueline R Arenz, M.D., Mount Laurel, NJ  
Patricia Adriana Ares Romero, MD, North Miami, FL  
Tichianaa Armah, M.D., Norwalk, CT  
James Alden Armontrout, M.D., Mountain View, CA  
Cody Chance Armstrong, M.D., Granbury, TX  
Jamie Lee Lussier Arnold, D.O., Mason, MI  
Christina Arredondo, M.D., Tucson, AZ  
Ricardo Luis Arribas Cruz, M.D., San Juan, PR  
Alejandra Elizabeth Arroyave, M.D., Doral, FL  
Khalid Naveed Arshad, M.B.B.S., Durham, NC  
Sadaf Ashfaq, M.B.B.S., Franklin, TN  
Samieh Askari, M.D., New Brunswick, NJ  
Aaron Robell Assefaw, M.D., Fort Worth, TX  
Matthew Atienza, M.D., Park Ridge, IL  
Huma Yasmin Attari, M.D., Sacramento, CA  
carolyn auffenberg, M.D., Ann Arbor, MI  
Lauren Pomerantz Augello, M.D., Seattle, WA  
Nicholas Austin, M.D., Chicago, IL  
Michael Avissar, M.D., New York, NY  
Poonam Awatramani, M.D., New York, NY

Alondra Mali Ayala Jimenez, M.D., Alexandria, VA

Shehzad Ayub, D.O., Scottsdale, AZ

Mohammed Azam, M.D., Silver Spring, MD

Naazia Azhar, M.D., Saint Louis, MO

Tarek Aziz, M.B.B.S., Greensboro, NC

Hafizullah Azizi, M.D., Rancho Cucamonga, CA

Christopher Reddin Baca, M.D., Boston, MA

Katherine Backes, M.D., Chicago, IL

Dimitri Bacos, M.D., Campbell, CA

Maria Andrea Baez, M.D., New York, NY

Mandeep Singh Bagga, M.D., Visalia, CA

Reena Baharani, M.D., Stony Brook, NY

Robert F Bahnsen Jr, M.D., Philadelphia, PA

Mark Marlin Bahoura, M.D., Westlake, OH

Elizabeth Lynne Baker, MD, West Columbia, SC

Megan Elizabeth Baker, M.D., Palo Alto, CA

Teresa Baker, M.D., Tampa, FL

Alena Balasanova, M.D., Omaha, NE

Nicholas King Baldwin, D.O., Mesa, AZ

Javier Ballester Gonzalez, M.D., Hamden, CT

Danit Bar Ziv, M.D., Stevenson Ranch, CA

Hamza Hayden Barmada, M.D., Boston, MA

Rajdip Barman, M.D., Malden, MA

Alicia Ann Barnes, D.O., Bellerose, NY

Shawn Barnes, M.D., Encinitas, CA

Dawny Mitchell Barnhart, D.O., Kansas City, KS

Anahita Bassir Nia, M.D., Brooklyn, NY

Sonal Batra, M.D., Colonia, NJ

Ramneesh Baweja, M.B.B.S., Texarkana, TX

Ritika Baweja, M.D., Hummelstown, PA  
Jocelyn Kelly Bayliss, M.D., Grovetown, GA  
Anna Kaitlyn Beasley, M.D., Austin, TX  
Allison Winona Beckler, D.O., Gardner, MA  
David Beckmann, M.D., Boston, MA  
Jennifer Beckwith, D.O., Indianapolis, IN  
Carina Elizabeth Behrens, M.D., Cincinnati, OH  
Xavier Belcher, M.D., Suffolk, VA  
Danielle Nicole Bell, M.D., Conway, AR  
Brian Steven Bello, M.D., Los Angeles, CA  
Rosa Angelica Bellota Rojas, M.D., Las Vegas, NV  
Amr Beltagui, M.B.Ch.B., Norfolk, NE  
Marek Belz, MD, Upper Saddle River, NJ  
Rivka Rivi Ben Dor, M.D., Rockville, MD  
Erik Halden Bengtson, M.D., New York, NY  
Michelle Benitez Cabrera, M.D., North Bay Village, FL  
Derek Berberian, M.D., Allendale, NJ  
Joshua Berezin, M.D., Brooklyn, NY  
Alexander Berger, D.O., New York, NY  
Seth Alan Berger, M.D., New York, NY  
Stephen Paul Berger, M.D., portland, OR  
Julio Bernardi, M.D., Saint Louis, MO  
Robin Bershader, D.O., Nashville, TN  
Casey Berson, M.D., Cherry Hill, NJ  
Aaron Besterman, M.D., Los Angeles, CA  
Laura Bevilacqua, M.D., Brooklyn, NY  
Kranti Kiran Bhagi, M.D., Pittsfield, MA  
Kamal Surinder Bhatia, M.D., Frederick, MD  
Gurmanjot Bhullar, M.B.B.S., Orange, CA



Ryan Bierkortte, D.O., Pittsburgh, PA  
Aislinn Alicia Bird, M.D., Los Altos Hills, CA  
Ram Jeevan Bishnoi, M.B.B.S., Evans, GA  
Vint Rolston Blackburn, M.D., Pgh, PA  
Caren Jacquetta Blacker, M.B.Ch.B., Rochester, MN  
Katherine Blackwell, M.D., Rocky Hill, CT  
Keisha Natasha Blair, M.D., Jacksonville, NC  
Thomas Blair, M.D., Long Beach, CA  
Benjamin Thomas Bloxham, M.D., Encino, CA  
Ryan Blum, M.D., Berkeley, CA  
Ketankumar V. Bodarya, M.B.B.S., Frederick, MD  
Avinash Boddapati, M.B.B.S., Staten Island, NY  
Thomas Boes, M.D., Westbury, NY  
Anisha M Boetel, M.D., Spokane, WA  
Elise Bonder, M.D., Shaker Hts, OH  
Sean Bordelon, M.D., Chicago, IL  
Rachel Borden, M.D., Rochester, NY  
Eric Bossi, M.D., Tucson, AZ  
Jason Grady Boudreaux, M.D., Baton Rouge, LA  
Frederick Austin Boyer, D.O., Atlanta, GA  
Meredith Brady, M.D., Palo Alto, CA  
Sara Jeanne Brady, M.D., Brookline, MA  
Elizabeth Hayden Brannan, M.D., Barrington, RI  
Andrew Bregman, M.D., Sacramento, CA  
Peter Breslin, M.D., Richmond, VA  
Leigh Anne Bressler, D.O., Portland, OR  
Joel Stephen Breving, M.D., Houston, TX  
Jennifer Marie Brewer, M.D., San Francisco, CA  
Trimaine Monee Brinkley, M.D., Suffolk, VA

Patrick Britton, M.D., Wauwatosa, WI  
Laura Brogoch, M.D., Portland, OR  
Alexander S. Brooks, D.O., Sparks, NV  
Audrey Lynn Brooks, M.D., Parkville, MO  
Deborah M. Brooks, M.D., Baltimore, MD  
Thomas Jefferson Brooks, M.D., Atlanta, GA  
Derek Edward Brown, D.O., Kansas City, MO  
Gregory Brown, M.D., Durham, NC  
Jordan Daniel Brown, M.D., Rockledge, FL  
Michael Jonathan Brown, M.D., Baltimore, MD  
Miriam Elaine Brown, M.D., Eagan, MN  
Robert Calvin Brownlee IV, M.D., Charleston, SC  
Caroline De Oleo Brozyna, M.D., Baltimore, MD  
Nicholas James Bryant, M.D., Houston, TX  
William Culbertson Bryson, M.D., Seattle, WA  
Andrea Bulbena Cabre, M.D., Hoboken, NJ  
Abel M. Bumgarner, M.D., Baltimore, MD  
Cullen William Burke, M.D., Baton Rouge, LA  
Alaina Vandervoort Burns, M.D., Los Angeles, CA  
Katrina E. Burns, M.D., Chicago, IL  
David Nathan Burrow, M.D., South Euclid, OH  
Paul Howard Butler, D.O., Bossier City, LA  
Austin Lee Butterfield, M.D., Aurora, CO  
Johanna Cabassa, MD, Scarsdale, NY  
Stella Cai, M.D., Temple City, CA  
Kimothi Cain, M.D., Albuquerque, NM  
Joseph C. Calleja, M.D., Sarasota, FL  
Shireen Farhad Cama, M.D., Cambridge, MA  
Robert A Campbell II, M.D., Louisville, KY

Claudia Campo-Soria, M.D., Minneapolis, MN  
Yusef Canaan, M.D., Palmetto Bay, FL  
Erik Cantrell, M.D., Charleston, SC  
Alexander Cardenas, M.D., San Mateo, CA  
Regan Carey, M.D., San Francisco, CA  
Mario Andres Caro Sabogal, M.D., New Haven, CT  
Robin Kimberly Caron, D.O., Worcester, MA  
William Russell Carpenter, D.O., Columbia, MO  
Philippe J Carrie, M.D., Miramar, FL  
Kristel Carrington, M.D., Guttenberg, NJ  
Arthur Thomas Carter, M.D., Menlo Park, CA  
John Paul Casas, M.D., Niskayuna, NY  
Felix Casiano, MD, San Antonio, TX  
Nelly Ann Catala Flores, M.D., Mayaguez, PR  
Blanca Guadalupe Cervantes, M.D., Irvine, CA  
Jennifer Chaffin, D.O., Portland, OR  
Deepti Chowdary Challagolla, M.B.B.S., Myrtle Beach, SC  
Cheong Wai Chan, M.D., Fond Du Lac, WI  
Stephanie Hoi-Ling Chan, M.D., Torrance, CA  
Steven Chan, M.D., San Francisco, CA  
Vijay Bunny Chand, M.D., Towson, MD  
Charles Alexander Chaney, M.D., San Diego, CA  
Michelle Anne Chaney, M.D., Boston, MA  
Joanne Chang, M.D., Manhasset, NY  
Mason Chai-sir Chang, M.D., New Hyde Park, NY  
Raymond R Chankalal, M.D., Buffalo, NY  
Christopher Charles, M.D., Reno, NV  
Kimberlee Rose Charles, M.D., Reno, NV  
Deanna Chaukos, M.D., Toronto, ON

Ivan Mauricio Chavarria-Siles, M.D., New York, NY

Krystal Chavez, D.O., Tucson, AZ

Leslie L. Chavez, M.D., Albuquerque, NM

Sergio Boris Chavez, M.D., Phoenix, AZ

Frinette Maria Checo, M.D., Beloit, WI

Janet Chen, MD, New York, NY

Jayleen Chen, M.D., Reno, NV

Karen Chen, M.D., Gardena, CA

Yucui Chen, M.D., Riverside, CA

Ying-chia Cheng, D.O., Warwick, RI

Jonathan Chernaik, M.D., Evanston, IL

Ram Chettiar, D.O., Overland Park, KS

Vamsi M. Chiguripati, D.O., Westbury, NY

Raymond Chiong, D.O., Valhalla, NY

Christine Chiu, M.D., San Jose, CA

Sung Hak Choi, D.O., Santa Clara, CA

Shujah Akram Choudhry, D.O., Nashville, TN

Charoo Chouhan, M.D., Houston, TX

Douglas Kendrick Christie, M.D., Seattle, WA

Ijeoma Chukwu, M.D., Corona, CA

Frank Chumley, M.D., Glenside, PA

Sruthi Chunduri, M.B.Ch.B., Portland, OR

Dorothy Chyung, M.D., New York, NY

Valentina Cimolai, M.D., Washington, DC

Courtney Cinko, MD, Cincinnati, OH

Aminata Cisse, M.D., Philadelphia, PA

Kelly Cleaves, D.O., Portland, OR

Mark Andrew Clifford, MD, North Pole, AK

Kimberly Clinebell, M.D., Sewickley, PA

Daniel J Cohen, M.D., Pittsburgh, PA

Eric Cohen, M.D., Fargo, ND

Richard Adrian Colletti, M.D., Franklin, TN

Jeanine S. A. Collier, M.D., North Bend, OR

Hector Colon Rivera, M.D., New Haven, CT

Dayan Colon Sanchez, M.D., Denver, CO

Kerry D Conant, D.O., Lynn, MA

Carlos Alberto Contreras, M.D., San Diego, CA

Ryan James Cook, M.D., Charleston, WV

Thomas Cook, M.D., Honolulu, HI

Jacob Cookey, MD, Dartmouth, NS

Jillian Copeland, M.D., New York, NY

Brandon Corbett, D.O., Asheville, NC

Maisha Michelle Correia, M.D., Boise, ID

Alicia Cowdrey, M.D., Phoenix, AZ

Elizabeth Cox, M.D., Chapel Hill, NC

Diana Cozma, M.D., Philadelphia, PA

Katrina Maria Crader, M.D., Bixby, OK

Shane A Creado, M.D., Madison, WI

Kimberly Kay Cress, M.D., Sugar Land, TX

Dominique Crosby, D.O., Upper Marlboro, MD

Jeanie Sharon Croshaw, D.O., Temple, TX

Roberto Antonio Cruz Barahona, M.D., New York, NY

Caroline Cruz-Ortiz, M.D., West Miami, FL

Claudia Cuervo, M.D., Lafayette, LA

Emily Cullen, M.D., Charleston, SC

Heather Cumbo, M.D., Clearwater, FL

Jennifer Cummings, MD, San Francisco, CA

Carrie Melissa Cunningham, M.D., San Francisco, CA

Michelle M. Curro, D.O., Bethpage, NY  
Jacqueline Geneva Curtis, M.D., Dallas, TX  
Mark D'Agostino, M.D., Katonah, NY  
Mitul Rajendra Dadhania, M.D., Cincinnati, OH  
Shaun Daniel Daidone, M.D., Denver, CO  
John Peter Daly, M.D., Torrance, CA  
Marina Francis Damis, M.D., Macedonia, OH  
Katharine E. Danner, M.D., Albuquerque, NM  
Humera Naz Danwar, M.B.B.S., Spring, TX  
Folabo Yetunde Dare, D.O., Blue Ash, OH  
Vivek Datta, M.B.B.S., San Francisco, CA  
Earl Andrew Balayan De Guzman, M.D., Redwood City, CA  
Rosebelle de Leon, M.D., Chicago, IL  
Maria Claudia De Pombo Luna Ms., M.D., Kew Gardens, NY  
Arkaprava Deb, M.D., Madison, WI  
Juan DeJesus, M.D., Denver, CO  
Adriana deJulio, M.D., Boston, MA  
Sibylle Frederique Delaloye, M.D., El Segundo, CA  
Thyanne Camargo Delima-Tokarz, D.O., Pleasant View, TN  
Elaina DellaCava, M.D., Bronx, NY  
Stamatios Dentino, M.D., SLC, UT  
Anthony Joseph Deo, M.D., Fort Lee, NJ  
Lauren Derhodge, D.O., Buffalo, NY  
Toral Nitinbhai Desai, M.D., Charlottesville, VA  
Andrea DeStories, M.D., Carson City, NV  
Sanket Rajaram Dhat, M.B.B.S., Lynchburg, VA  
Phoebus James Dhrymes Jr, MD, New York, NY  
Alodia Diaz de Villegas, M.D., Miami, FL  
Tzvetelina Dimitrova Dimitrova, MD, Washington, DC

An Hong Dinh, D.O., Houston, TX  
Vien Dinh, M.D., Sarasota, FL  
Osarumen Nicole Doghor, M.D., Houston, TX  
Olanrewaju Dokun, M.D., Brooklyn, NY  
Teresa Marie Dolphin-Shaw, D.O., Birmingham, AL  
Yuelel Dong, M.D., Baltimore, MD  
Kevin Donnelly-Boylen, M.D., Boston, MA  
Srinivasa Reddy Donthi Reddy, M.B.B.S., Midland, TX  
Ky G Dorsey, M.D., Mountain Green, UT  
Seth Michael Dorsky, M.D., Boston, MA  
Vishal Kirtikant Doshi, M.D., Secaucus, NJ  
Candes Dotson, D.O., Baltimore, MD  
John William Dougherty III, D.O., Kennett Square, PA  
Lauren Sherice Douglas, M.D., Houston, TX  
Michael Downes, M.D., Portsmouth, VA  
Tiffany Doyle, M.D., Moorhead, MN  
Blazen Draguljic, MD, Tampa, FL  
Karina Alexandra Drake, M.D., Dexter, MI  
Frederick Duennebier, M.D., Honolulu, HI  
Ashley Elisabeth Dumas, M.D., Little Rock, AR  
Lucas Dunklee, M.D., Albuquerque, NM  
Kathleen Beach Jackson Dunlap, M.D., Biltmore Forest, NC  
Travis P Dunn, M.D., Maple Grove, MN  
Tammy Duong, M.D., San Francisco, CA  
Saramma Eappen, M.B.B.S., Greensboro, NC  
Seth Eappen, M.D., Orland Park, IL  
Robert Eaton, M.D., Gainesville, FL  
Bharathi Eddula Changala, M.B.B.S., Collierville, TN  
Christopher Edge, M.D., Nashville, TN

Ryan Timothy Edwards, M.D., Ann Arbor, MI  
Sahar Eftekhari, D.O., Los Angeles, CA  
Amy Egolf, M.D., Providence, RI  
Benjamin Egusquiza, M.D., Dallas, TX  
Adrienne Eisner, M.D., Fort Myers, FL  
Salim El Sabbagh, M.D., New York, NY  
Ammar Kassem El Sara, M.B.Ch.B., Valhalla, NY  
Yosra El-Menshawi, D.O., Milpitas, CA  
Hani M El-Wafi, M.D., Durham, NC  
Paul Elizondo, M.D., San Francisco, CA  
Roba Elkhailil, M.D., Dearborn Hts., MI  
Mark Thomas Ellestad, M.D., Seattle, WA  
Hudson Elmore, M.D., New York, NY  
Yanko Arisney Enamorado, M.D., Miami Beach, FL  
Sarah Ann Engle, MD, Arlington, VA  
Igor Epstein, D.O., Troy, NY  
Dianna Esmaeilpour, M.D., Little Rock, AR  
Justin Estaris, M.D., Playa Vista, CA  
Marc Francis Etensohn, M.D., West Palm Beach, FL  
Christine Evans, M.D., San Diego, CA  
Joshua Andrew Evans, M.D., Denver, CO  
Benjamin Everett, M.D., Tuba City, AZ  
Pamela Kay Fadness, M.D., Williston, VT  
Josneldavmatus H Faiivae, M.D., Columbia, SC  
Oscar Saul Fajardo Gomez, M.D., Port St Lucie, FL  
Yunjing Fang, M.D., Berkeley, CA  
Ayesha Farhan, M.D., Norman, OK  
Erica Fasano, M.D., Manchester, NH  
Gavrosh Faylayev, M.D., Flushing, NY



Piergiuseppe Fedele, M.D., New York, NY  
Robert Feeley, M.D., Stamford, CT  
Mallory Weimo Feng, M.D., Mountain View, CA  
Wendy Feng, M.D., Menlo Park, CA  
Robert Jonathan Fenster, M.D., Seattle, WA  
Nisha Hazel Fernandes, M.D., Chicago, IL  
Gerard Iru Fernando, M.D., Quincy, MA  
Myra Deanne Fernando, D.O., New Orleans, LA  
Michelle Christine Ferrara, M.D., Brooklyn, NY  
Fabio Ferrarelli, M.D., Pittsburgh, PA  
Chiara Ferrari, M.D., Chicago, IL  
Mona Collado Ferrer, M.D., Cleveland, OH  
Arman Fesharaki-Zadeh, M.D., New Haven, CT  
Katherine Fichtel, M.D., Brooklyn, NY  
Steven Figiel, D.O., Atlanta, GA  
Julianna Marie Finelli, M.D., New Orleans, LA  
Rachel Fischer, M.D., New York, NY  
Hazel T Fishel, M.D., ASHEVILLE, NC  
Sarah Fitzgerald, M.D., Teaneck, NJ  
Sarah Flanders, M.D., Tulsa, OK  
Thomas Paul Fletcher, M.D., Galveston, TX  
Lee Milgram Flowers, M.D., Rochester, MN  
Anika C Forbes, D.O., Ponte Vedra, FL  
Nicole Melanie Fox, M.D., Boise, ID  
Iuiana Elena Frank, M.D., Baltimore, MD  
Brian A Frankel, M.D., New Haven, CT  
Lauren Franz, M.B.Ch.B., Durham, NC  
Jamie Franzen, M.D., Roslindale, MA  
Dean Adison Fraser, M.D., Honolulu, HI

Michael Frazier, M.D., Anaheim, CA

Rebecca Anne Frost, M.D., Temple, TX

Andi Fu, M.D., Philadelphia, PA

Annabel Fu, M.D., Rochester, NY

Brian Seth Fuchs, M.D., New York, NY

Tzvi Furer, M.D., New York, NY

Gayatriben Sameer Gadani, M.B.B.S., Ellisville, MO

Raghavendran Goud Gajagowni, M.B.B.S., Tupelo, MS

Ramandeep Singh Gakhal, MD, SHOREVIEW, MN

Marta Galecki, M.D., New York, NY

Ashli M. Gamber, M.D., Baltimore, MD

Hilary Gamble, M.D., Syracuse, NY

Kamal Gandotra, M.D., Washington, DC

Daniel Garay, M.D., Coral Gables, FL

Inna Garber, D.O., Richmond, VA

Lizzet Garcia, M.D., Brooklyn, NY

Jesus Guillermo Garcia Mayorga, M.D., Amarillo, TX

Jordan Scott Gardner, M.D., Golden, CO

Tiffany Gartrell, M.D., Dunwoody, GA

Ernest A. Gbadebo-Goyea, M.B.B.S., Belleville, IL

Weston Geddings, M.D., Chapel Hill, NC

Ian Storey Geis, D.O., Upatoi, GA

Karen M George, M.D., Lafayette, LA

Kirsten Carol George, M.D., Elkridge, MD

Christina Dearie Gerdes, M.D., North Bellmore, NY

Adrienne Gerken, M.D., Boston, MA

Wil Edvard Germain, M.D., Central Islip, NY

Scott Alan Gershan, M.D., Chicago, IL

Justin Gerstner, M.D., Madison, WI

Roslyn Levine Gerwin, D.O., Portland, ME  
Maria Ghanbari Motlagh, M.D., Woodbridge, CT  
Manzer H Ghaznavi, M.D., North Hills, CA  
Kinjal Janak Ghelani, M.B.B.S., Spanish Fort, AL  
Erica Ghignone, M.D., Chicago, IL  
Kristen J. Gialo, D.O., Baltimore, MD  
Patrick Henry Gibbons, M.D., Webster, NY  
Hunter Gibbs, M.D., Pittsburgh, PA  
Amin Gilani, M.B.B.S., Hoover, AL  
Candace Giles, M.D., Elkridge, MD  
Rebecca Elizabeth Gilfillan, M.D., Chicago, IL  
Amanjot Gill, M.B.B.S., Roseville, CA  
Nathaniel Daum Ginder, M.D., Los Angeles, CA  
Anthony Giovanone, D.O., Pittsfield, MA  
Shih Yee-Marie Tan Gipson, M.D., Boston, MA  
Kevin Gleason, D.O., Fort Lauderdale, FL  
Amy Ruth Glick, M.D., New York, NY  
Haig Armen Goenjian, M.D., Torrance, CA  
Erich Goetzel, M.D., Somerville, MA  
David Ryan Goldsmith, M.D., Atlanta, GA  
Gabriella Lilly Goldstein, M.D., Long Island City, NY  
Juan Gonzalez, M.D., San Bernardino, CA  
Roberto Omar Gonzalez, M.D., Pearland, TX  
Amelia Goodenough, M.D., New Orleans, LA  
Heather Goodman, M.D., New York, NY  
Srinath Gopinath, M.B.B.S., Brooklyn, NY  
Vijay Gorrepati, M.D., Chicago, IL  
Rajan Gosain, M.D., newton, MA  
Urvashi Goswami, M.D., Reno, NV

Angela Gough, D.O., Kaneohe, HI  
Ajay Goyal, M.D., New York, NY  
Iva Grabic, M.D., San Diego, CA  
James Graham, D.O., Cherry Hill, NJ  
Catherine Marie Green, M.D., Durham, NC  
Cheryl Lea Green, M.D., Dayton, OH  
Jennifer Lincoln Gillis Green, D.O., Centennial, CO  
Elizabeth Levine Greene, M.D., Washington, DC  
Heather Greenspan, M.D., Atlanta, GA  
Meridith Griebeler, M.D., Portland, OR  
Rachel Grimminck, MD, Calgary, AB  
Brian Lee Grimwood, D.O., Noblesville, IN  
Monica Grover, M.D., Houston, TX  
Felix J. Grucci III, D.O., East Patchogue, NY  
Delisa Eva Guadarrama, M.D., Edinburg, TX  
Roberta Maria Guimaraes De Oliveira, MD, New York, NY  
Ashwini Gulwadi, M.B.B.S., Ypsilanti, MI  
Sateesh Gunda, M.B.B.S., Springfield, MO  
Neha Gupta, M.D., Watchung, NJ  
Neha Gupta, M.B.B.S., Cincinnati, OH  
Sarah Louise Gupta, M.D., San Francisco, CA  
Lindsey Gurin, M.D., New York, NY  
Sarah Ellen Eberhardt Guth, M.D., Burlington, VT  
Nicole Danielle Gutierrez, M.D., Grand Prairie, TX  
Sara Anne Haack, M.D., Seattle, WA  
Danielle Renee Hafner, MD, Florence, OR  
Poone Haghani Tehrani, M.D., Albuquerque, NM  
Danielle Hairston, M.D., Baltimore, MD  
Najma Hamdani, M.D., Norman, OK

Sasha Hamdani, M.D., Kansas City, MO  
Alexis Shea Hammond, M.D., Baltimore, MD  
David Hanrahan, M.D., Temecula, CA  
Laura Hanrahan, M.D., East Amherst, NY  
Melinda Marie Hansen, M.D., Anchorage, AK  
Sara Melissa Hansen, M.D., La Jolla, CA  
Timothy Hanson, M.D., Portland, OR  
Rashad Hassan Hardaway, M.D., Seattle, WA  
Meredith Eileen Harewood, M.D., Orange, CA  
Nathan Russell Harper, M.D., Greenville, NC  
Nathan Timothy Harrington-Foster, M.D., Charleston, WV  
Charles Harris, M.D., Syracuse, NY  
Elana Harris, MD, Cincinnati, OH  
Wynetta Harris, M.D., Chicago, IL  
Adam Hart, M.D., Ann Arbor, MI  
Sirajul Hasan, D.O., Boca Raton, FL  
Asma Irfan Hashmi, M.D., Tracy, CA  
Aaron Julian Hauptman, M.D., New York, NY  
Aaron Michael Hawkins, M.D., Auburn, AL  
Gabriela Hayes, M.D., New York, NY  
Elizabeth Ann Hayford, M.D., North Canton, OH  
Edward Elton Hearn, D.O., Beaufort, SC  
Michelle K Heaton, D.O., Shorewood, WI  
Michael K. Heck, D.O., Charlottesville, VA  
Vineka Heeramun, M.D., South Jordan, UT  
Melissa Heffler, M.D., Buffalo, NY  
Virginia Ruth Heller, M.D., Tulsa, OK  
david scott helm, MD, jackson, TN  
Elizabeth Heins Helton, D.O., Nashville, TN

Kenneth Heng, MD, Vancouver, BC  
Mariel R. Herbert, M.D., San Bruno, CA  
Nathan Herman, M.D., Norfolk, NE  
Manuel Hernandez, M.D., Independence, MO  
Sarah Hernandez, M.D., San Antonio, TX  
Stephanie Hernandez, D.O., Revere, MA  
Gabriel Hernandez Beauchamp, M.D., GUAYNABO, PR  
Clark Renwick Herniman, D.O., Jamestown, ND  
Brady Heward, M.D., Essex, VT  
Chelsea Autumn Hickerson, M.D., Atlanta, GA  
Wesley Joy Hill, M.D., Gainesville, FL  
Dora Eva Hillman, D.O., Okemos, MI  
Audrey Hime, M.D., Signal Mountain, TN  
Joseph H Hime, M.D., Signal Mountain, TN  
Duong Vien Ho-Hoang, D.O., La Mirada, CA  
Laura Elaine Hodges, M.D., Providence, RI  
Troy Colston Hoff, D.O., Henrico, VA  
Holly Holbrooks-Kuratek, M.D., Seattle, WA  
Emily Holmes, M.D., Chapel Hill, NC  
Brian Holoyda, M.D., Sacramento, CA  
Sarah Caroline Homitsky, M.D., Gibsonia, PA  
Matthew Angelo Hopkins, M.D., Washington, DC  
Christopher Horne, M.D., Sacramento, CA  
Maryam Hosseini, M.D., Atlanta, GA  
Heidi Hotin, D.O., Boston, MA  
Kristina Hotz, D.O., Columbia, SC  
Siv Hour, M.D., Los Angeles, CA  
Samuel Jordan House, M.D., Sherwood, AR  
Sarit Hovav, M.D., Omaha, NE

Poh Choo How, M.D., Sacramento, CA  
Jennifer Bianca Howse, M.D., Boston, MA  
Chenen Hsieh, M.D., Baton Rouge, LA  
YuPei Hu, M.D., Newton, MA  
Joshua John Hubregsen, M.D., Dallas, TX  
Jamie B Huff, D.O., Fort Worth, TX  
Hugh Howard Humphery, M.D., Palmetto Bay, FL  
Nida Husain, D.O., Saginaw, MI  
Shahid Hussain, M.B.B.S., Murphy, TX  
Syed Babar Hussain, M.B.Ch.B., Schaumburg, IL  
Wajid Hussain, M.B.B.S., Shorewood, IL  
Marilise Hyacinth, M.D., East Haven, CT  
Kelli Jo Hyland, MD, Salt Lake City, UT  
Julie Hylton, M.D., Sacramento, CA  
Bushra Iftikhar, M.B.B.S., Delmar, NY  
Manjusha Ilapakurti, M.B.B.S., Imperial, CA  
Matthew Iles-Shih, M.D., Seattle, WA  
Geeta Sai Ilipilla, M.D., Ardmore, PA  
Gina Kim In, M.D., Galveston, TX  
Mohammed Iqbal, M.D., Cedar Falls, IA  
Syed Iqbal, M.D., Egg Harbor City, NJ  
Ilva Iriarte, M.D., Charleston, SC  
Tanvira Mustafa Islam, M.D., Forest Hills, NY  
Benjamin S. Israel, M.D., Baltimore, MD  
Erik Istre, M.D., Queensbury, NY  
Ashwin Jacob Mathai, M.B.B.S., Jersey City, NJ  
Sree Latha Krishna Jadapalle, M.D., Parma heights, OH  
Mohammad Ikram Jahangiri, M.D., Danville, CA  
Nicole Yvette Jaikaran, M.D., Galveston, TX

Vanita Jain, M.B.B.S., Riverton, UT  
Jason Jalil, M.D., Los Angeles, CA  
Christine Elizabeth James, D.O., San Diego, CA  
Suni Niranjan Jani, M.D., Cambridge, MA  
Alisha Jaquith, M.D., Millbury, MA  
Matthew Jonas Jarrett, M.D., Philadelphia, PA  
Gregory B. Jasinski, M.D., Lisle, IL  
Diane Jasmin, D.O., Paramus, NJ  
Aaron Jeckell, M.D., Nashville, TN  
Sarah Jillani, M.B.B.S., Hamden, CT  
Monika R Jindal, M.D., Denver, CO  
Michelle Elizabeth John, D.O., Chicago, IL  
Salu Elizabeth John, M.D., San Diego, CA  
Amber Lynn Johnson, M.D., Northfield, MN  
Kim Graham Johnson, M.D., Chapel Hill, NC  
Robert Scott Johnson, M.D., San Francisco, CA  
Tiya Johnson, M.D., Louisville, KY  
Nathan Scott Johnston, D.O., San Antonio, TX  
joy katherine jones, MD, Federal Way, WA  
Justin Jones, M.D., Lewes, DE  
Kathryn Lorraine Jones, M.D., Boston, MA  
Kelly D Jones, M.D., Richmond Hill, GA  
Phillip Jones, M.D., Wake Forest, NC  
Stuart Jones, M.D., Madison, WI  
Alexandra Elizabeth Schuck Jordan, M.D., Harrisonburg, VA  
Brittany Dunn Jordan, D.O., Shalimar, FL  
Robyn Alexis Jordan, M.D., Raleigh, NC  
Thomas Andrew Jordan, M.D., Fredericksburg, VA  
Fadi C Josef, M.D., San Jose, CA



Jenny Joseph, M.D., New York, NY  
ranjit abraham joseph, MD, atascadero, CA  
Kshamta Joshi, M.D., Forest Hills, NY  
Christine Elizabeth Joy, M.D., San Antonio, TX  
Michelle Therssen Joy, M.D., Philadelphia, PA  
Sheena Joychan, M.D., Hartford, CT  
Angela Kim Jubert, MD, Tampa, FL  
Kristie Sue Julien, D.O., Scottsdale, AZ  
Amandeep Singh Jutla, M.D., Chicago, IL  
Susan Kahane - Pierre, M.D., New York, NY  
Silpa Kamiseti, M.D., Durham, NC  
Laurie S Kane, MD, New York, NY  
Sophia Kang, M.D., Des Moines, IA  
Rajasekhar Kannali, M.D., Parma Heights, OH  
Amish Karia, M.D., Irving, TX  
Ambika Kataria, M.D., Forest Hills, NY  
Amanjot Kaur, M.D., Charlottesville, VA  
Gagandeep Kaur, M.D., Louisville, KY  
Rajniderpal Kaur, M.D., Houston, TX  
Lisa Kebejian, M.D., Timonium, MD  
Asheena Keith, M.D., Corona, CA  
Amy Rebecca Kelley, M.D., Plandome, NY  
Marc Kelliny, M.D., Rochester, MN  
Kathryn Anne Kenney, D.O., Coralville, IA  
Alyson Kepple, M.D., Pittsburgh, PA  
Miller James Kerr, M.D., Salinas, CA  
Talene Keshishian, M.D., Tujunga, CA  
Barbara Marie Kessel, D.O., Denver, CO  
Simreet Khaira, M.B.B.S., Boston, MA

Aneela Khan, M.B.B.S., BrynMawr, PA  
Asif Hayat Khan, M.D., New York, NY  
Fariha Khan, M.B.B.S., Burlington, NJ  
Huma Khan, M.D., McKinney, TX  
Masood Ali Khan, M.D., Vestavia, AL  
Mili Manoj Khandheria, M.D., Dallas, TX  
Navjot Khinda, M.D., New York, NY  
Raunak Sunil Khisty, M.B.B.S., Winston Salem, NC  
Raena Akbari Khorram, M.D., Haverford, PA  
Nayla Muin Houry, M.D., Seattle, WA  
Hussain Khrad, M.B.B.S., BOSTON, MA  
Swapnil Khurana, M.D., Cleveland, OH  
Saniya Noor Kibria, M.D., Norhport, NY  
Jyotsna Kilani, M.D., Wellesley, MA  
Patrick B Killoran, M.D., Camden, ME  
Matthew Kiltbau, M.D., Templeton, CA  
Ah Young Kim, M.D., Englewood cliffs, NJ  
Ahreum Kim, M.D., Yakima, WA  
Dave Sungsoo Kim, M.D., Pittsburgh, PA  
Jung Won Kim, M.D., Quincy, MA  
William Kim, M.D., Philadelphia, PA  
Amal Akbar Kimawi, M.B.Ch.B., medford, MA  
Brian Kincaid, M.D., Durham, NC  
Kristi Kindrick, M.D., Fort Smith, AR  
Irina Gennadyevna King, M.D., Ann Arbor, MI  
Eric Kinsman, M.D., Fort Polk, LA  
Susan Singer Kirsch, M.D., Atlanta, GA  
Amanda Louise Klass, D.O., Raymore, MO  
Fiana Klein, D.O., Plainview, NY

Elaina Klimchuck, MD, Austin, TX  
Katherine Klingensmith, M.D., New Haven, CT  
Andrew Klise, M.D., Raleigh, NC  
Daniel Knoepflmacher, M.D., New York, NY  
Ehab Komsan, D.O., Colorado Springs, CO  
David John Konczal, M.D., Stockton, CA  
Thadeus Koontz, M.D., Orofino, ID  
Hart Nicholas Kopple-Perry, D.O., New York, NY  
Amber Kostial, M.D., Burlington, VT  
Nathaniel Alfredo Kouns, M.D., Birmingham, AL  
Andrei Kreutzberg, M.D., San Francisco, CA  
Hal Kronsberg, M.D., Somerville, MA  
Matthew Kruse, M.D., Minneapolis, MN  
Andrew Kuhle, D.O., Rockville, MD  
Shreedhar Ramachandra Kulkarni, M.B.B.S., Springfield, IL  
Sonali Kumari, M.B.B.S., Chicago, IL  
Priya Kundu, D.O., Westlake, OH  
Justin Kung, M.D., Weehawken, NJ  
Vijeta Kushwaha, M.D., Pittsford, NY  
Myo Kyaw, M.B.B.S., Brooklyn, NY  
Robert Lacroix, MD, Vancouver, BC  
Jamie Lim Lacsina, D.O., Hayward, CA  
Stefani LaFrenierre, M.D., Fort Worth, TX  
Tiffany Regal Lago, M.D., Rockville, MD  
Heidi Lahteenmaa, M.D., Madeira Beach, FL  
Pooja Lakshmin, M.D., Washington, DC  
Joseph Lalia, D.O., West Palm Beach, FL  
Alisa Joy Land, M.D., Topanga, CA  
Abigail Elizabeth Langan, M.D., Katy, TX

Jacquelyn Rae Lange-Halley, M.D., Fayetteville, AR

Juntira Laothavorn, M.D., Avondale Estates, GA

Damien Michael Larkins, M.D., Houston, TX

Jane Margaret Larouche, D.O., Eagle River, AK

Matthew Ford Larsen, D.O., Idaho Falls, ID

Erica Larson, D.O., Lansing, MI

Rahul Lauhan, M.D., Johnson City, TN

Maritza Nilda Laura, M.D., Savannah, GA

Nicholas Lawrence Lavin, M.D., New Orleans, LA

Justin Michael Lazaroff, D.O., Broomall, PA

Janette C Leal, M.D., Rochester, MN

Angela Lee, M.D., Long Island City, NY

Chuan Mei Lee, M.D., San Francisco, CA

Jena Lee, M.D., Stanford, CA

Lesley Hongikung Lee, M.D., Philadelphia, PA

Robert Jaemoon Lee, D.O., New York, NY

Ronald Tae Lee, M.D., Wrentham, MA

William Wei Lee, M.D., San Antonio, TX

Yae Rim Lee, M.D., Chatham, IL

Gunjan Lehil, M.B.B.S., Reno, NV

David Alan Lekberg, M.D., Chesterfield, VA

William Howard Lemley, M.D., Hampton, VA

Alison Elizabeth Lenet, M.D., New York, NY

Sean Robert LeNoue, M.D., Denver, CO

Briana Lester, M.D., Winona, MN

Justin Shern-Chi Leung, M.D., New York, NY

Justin Lewin, M.D., New York, NY

Alan Lewis, M.D., Hamden, CT

Edward Thomas Lewis III, M.D., Charleston, SC

Sarah Michele Lewis, D.O., Port Angeles, WA

Luke Li, M.D., Goldsboro, NC

Naomi Zheng Lian, M.D., Glen Oaks, NY

Samuel Libeu, M.D., Chicago, IL

Kandace Licciardi, M.D., Staten Island, NY

Max Alan Lichtenstein, M.D., New York, NY

Morgan Birrell Liddell, M.D., Seattle, WA

John D Lii, M.D., Riverside, CA

Sandra S Lim, D.O., San Diego, CA

Wai Jenn Lim, M.D., HONOLULU, HI

Frederick Michael Limson, M.D., New York, NY

Austin Lin, M.D., Dallas, TX

Kenneth Chia Kuan Lin, M.D., Cincinnati, OH

Kenny Lin, M.D., Boston, MA

Ilewei lin, M.D., Ann Arbor, MI

Qi Ling, M.D., Forest Hills, NY

Daniel Edward Link, MD, SCOTTSDALE, AZ

Trixie Lipke, M.D., Chicago, IL

MARIA JOSE Lisotto, M.D., Somerville, MA

Virginia Paige Litz, D.O., Johns Island, SC

Haizhu Pearl Liu, M.D., Jamesville, NY

Jerome Liu, M.D., Providence, RI

Jeannie Lochhead, M.D., Huntington Beach, CA

Dee Brooke Lochmann, D.O., Wichita, KS

Sridevi Lokasubramanian, M.B.B.S., Bayside, NY

Mastan Reddy Lokireddy, M.B.B.S., Brooklyn, NY

Hermioni Lokko, M.D., Cambridge, MA

Jackie Long, M.D., Vero Beach, FL

Erica G. LoRe, D.O., Whitestone, NY

Diana Alicia Lorenzo, M.D., Shaker Heights, OH  
Joshua Lotfallah, M.D., Gainesville, FL  
Rajiv Ramesh Loungani, M.D., Mt Pleasant, SC  
Lee Lovejoy, M.D., New York, NY  
Kathryn Ann Lowery, D.O., Las Vegas, NV  
Wynne Lundblad, M.D., Pittsburgh, PA  
Ryan Michelle Lunsford, M.D., Honolulu, HI  
Lauren Lusk, M.D., Shreveport, LA  
Nathan Karl Maeser, M.B.B.S., Midway, UT  
Leela Magavi, M.D., Baltimore, MD  
Elena Malaika Magwene, M.D., Kent, WA  
Binal Kiran Maharaja, M.D., Chicago, IL  
Ram Suresh Mahato, M.D., Rego Park, NY  
Ahmed Maher, M.B.Ch.B., Aurora, CO  
Subani Maheshwari, M.D., Philadelphia, PA  
Yassir Mahgoub, M.D., Brooklyn, NY  
Dana Mahmoud, M.D., Chicago, IL  
Adham Malaty, M.D., Lancaster, PA  
Alexander Nguyen Ali Malekzadeh, D.O., Pleasant Hill, CA  
Rahul Malhotra, M.D., Summit, NJ  
Amit Malik, M.B.B.S., Dublin, CA  
Sarah Malik, M.B.B.S., Okemos, MI  
Kari A Malwitz, M.D., Coralville, IA  
Wenyan Man, M.D., San Bruno, CA  
Sasikala Manavalan, M.B.B.S., Watertown, MA  
Harish Mangipudi, D.O., Daniel Island, SC  
Kimberly Ann Mangla, M.D., New York, NY  
Pranjal Mann, M.D., Winterville, NC  
Shalini G. Mansharamani, M.D., Raynham, MA

Derrick Manzlak, M.D., Braintree, MA  
Javeeria Manzoor, M.B.B.S., Yucaipa, CA  
David Marcovitz, M.D., Cambridge, MA  
Ramzi Mardam Bey, M.D., New Haven, CT  
Benjamin Margolis, M.D., Pawtucket, RI  
Matthew S Markis, D.O., Granada Hills, CA  
Benjamin Marshall, M.D., Lexington, KY  
Toni Martello, M.D., Berkeley, CA  
Azalia Veronica Martinez, M.D., Sacramento, CA  
Jesse Carillo Martinez Jr., M.D., Fultondale, AL  
Nancy Rosemary Martinez Orellana, M.D., Los Angeles, CA  
Mona Masood, D.O., Glen Mills, PA  
Jaisha Mathew, M.D., Brooklyn, NY  
Anu Mathur, M.D., Burr Ridge, IL  
Margaret Elaine Mathur, M.D., Loveland, OH  
Noah Benjamin Matilsky, M.D., Tampa, FL  
Asna Anika Matin, M.D., Houston, TX  
Brent Matthew Matsunaga, M.D., Torrance, CA  
Mirabelle Mattar, M.D., Liverpool, NY  
Gerald O Matthews Jr, M.D., Georgetown, TX  
Daniel May, D.O., Apo, AP  
Jennifer May, M.D., New Orleans, LA  
Margaret Forbes May, M.D., Menlo Park, CA  
Aleea Maye, M.D., Norfolk, VA  
Benjamin Ethan McAllister, D.O., Indianapolis, IN  
Jacob McBride, D.O., Pittsburgh, PA  
Sean Michael McBride, M.D., Moorestown, NJ  
Jill Michael McCall, M.D., New Orleans, LA  
Molly Melissa McCarthy, D.O., Grand Rapids, MI

Brendan Patrick McCollum, M.D., Nutley, NJ  
Catherine Monica McCormick-Deaton, D.O., Flat Rock, MI  
Thomas McCoy, M.D., Boston, MA  
Elizabeth-Clare McCulloch Porter, M.D., Irmo, SC  
John McCurdy, M.D., Louisville, KY  
Fredysha McDaniel, M.D., Fresno, CA  
Adam Carlton McDonough, M.D., Winston Salem, NC  
Matthew Alexander McDougall, M.D., Sioux Falls, SD  
Matthew D McEachern, M.D., Charlottesville, VA  
Katherine McEvoy, M.D., Baltimore, MD  
Daniel Thomas McGovern, M.D., New York, NY  
Moiria Claire McKinnon Linam, M.D., San Francisco, CA  
Paige McLaughlin, M.D., Redwood City, CA  
Emily McMillan, M.D., Billings, MT  
Roxanne Claire McMorris, M.D., Houston, TX  
Michael Donnelly McQuiggan, M.D., Warwick, RI  
Adam Mecca, M.D., New Haven, CT  
Dorothee S. Mecum, M.D., Fayetteville, AR  
Matthew Meek, M.D., Lexington, KY  
Askar Mehdi, M.B.B.S., Middletown, CT  
Crystal Shirish Mehta, D.O., Indianapolis, IN  
Palav M Mehta, M.D., Louisville, KY  
Rajesh Kumar Mehta, M.B.B.S., Manchester, CT  
Todd Jordan Mekles, M.D., Kansas City, KS  
Hasan Memon, M.D., Eatontown, NJ  
Brian Mendenhall, D.O., Middleton, WI  
Veronica Mendoza-Jenkins, M.D., Tucson, AZ  
Meera Menon, M.D., Columbus, OH  
Christie Marie Mensch, M.D., Kansas City, KS



Zina Meriden, M.D., Chicago, IL  
Akos Mersich, M.D., Denver, CO  
Ashish V. Meshram, M.B.B.S., New York, NY  
Jennifer Mesrie, M.D., Bronx, NY  
Kelli Michelle Messina, MD, Charlottesville, VA  
Benjamin Seth Metelits, M.D., Phoenix, AZ  
Sangeeta Mettu, M.B.B.S., Columbia, MO  
Bart J Meyers, D.O., El Paso, TX  
Lesley Anne Michael, D.O., New York, NY  
Lee Michals, M.D., Shreveport, LA  
Meeta Michener, M.D., Denver, CO  
Jason Miiller, M.D., Iowa City, IA  
Derek M. Miletich, M.D., Duluth, MN  
Andrew Michael Miller, M.D., Indianapolis, IN  
Brandon James Miller, M.D., Temple, TX  
Michael Mahbod Mirbaba, M.D., Los Angeles, CA  
Maja Mircic, M.D., Sunnyvale, CA  
Omar F Mirza, D.O., New York, NY  
Sulman Aziz Mirza, M.D., Baltimore, MD  
Liza Mishan, M.D., New York, NY  
Sarthak Basant Misra, M.D., Arlington, MA  
Shanti Renee Mitchell, M.D., Ypsilanti, MI  
Larry David Mitnaul Jr., M.D., Lebanon, NH  
Paroma Mitra, M.B.B.S., New York, NY  
Wasi Mohamed, M.B.B.S., Milpitas, CA  
Susan Elizabeth Molchan, M.D., Bethesda, MD  
Aavid Momen, M.D., Bridgeport, WV  
Shameem Momin, M.D., Martinez, GA  
Luke Oliver Mong, M.D., Dallas, TX

Matthew Colburn Montgomery, M.D., Montgomery, OH

Nicole Jeannelle Montgomery, M.D., Portland, ME

Carly Montoya, D.O., Glendale, AZ

Genalynne Mooneyham, M.D., Durham, NC

David Moore, M.D., New Haven, CT

Sean Moran, M.D., Costa Mesa, CA

Gabriele Morosoff, M.D., Chapel Hill, NC

Joshua T Morra, M.D., Clarence, NY

Nicholas Morris, M.D., Alexandria, VA

Michael Dorian Morse, M.D., Washington, DC

Justin Mortimer, M.D., Newton, MA

Sonia Motin, M.D., Portage, MI

Mahsa Mousavinasab Mobarakeh, M.D., Miami, FL

Di Mu, M.D., Baltimore, MD

Mustafa Ali Mufti, M.B.B.S., Newark, DE

Kristen Rae Mullinax, M.D., Charleston, SC

Naureen Munawar, M.D., Marietta, GA

Arun Kumar Munjal, M.D., Sandy Springs, GA

Lakshmi Priya Munnangi, M.B.B.S., Wappingers Falls, NY

Sonia Uyen Munoz, M.D., Portland, OR

Kalyan Srinivas Muppavarapu, M.B.B.S., Oklahoma City, OK

James Andrew Murphy, M.D., Washington, DC

Lauren Murphy, D.O., Rochester, MN

Michael Murphy, M.D., Boston, MA

Dylan P Murray, M.D., Wauwatosa, WI

Melissa M Musec, M.D., Chicago, IL

Rachel Nadbrzuch, M.D., Rochester, NY

Anusuiya Nagar, M.D., Atlanta, GA

Ashok Kumar Nagella, M.D., Evanston, IL

Tarika Nagi, M.B.B.S., New York, NY  
Caesa Nagpal, M.B.B.S., Sugar Land, TX  
Maya Leigh Nair, M.D., Portland, OR  
Uzma Nakodary, M.D., Orangevale, CA  
Bernard Nanadiego, M.D., Tucson, AZ  
Reena Nandihalli, DO, Portland, OR  
Rodrigo Nardi, M.D., Providence, RI  
Margo Diana Nathan, M.D., Brookline, MA  
M.M. Naveen, M.D., Laurel, MD  
Komal Nayak, M.D., NY, NY  
Maryam Nazian Najafi, MD, Monterey, CA  
Mark Neahring, M.D., Dewey, IL  
Brian Neal, M.D., Seattle, WA  
Jeffrey Taylor Neal, M.D., Little Rock, AR  
Mallery Neff, M.D., Indianapolis, IN  
Ryan Neff, M.D., Scottsdale, AZ  
Vedika Nehra, M.D., El Cerrito, CA  
Sreenath Nekkhalapu, M.D., Fort Worth, TX  
Jaymee Nelson, M.D., Franklin, TN  
Joshua Nelson, M.D., Rochester, NY  
Michele Nelson, M.D., Huntington Beach, CA  
Neel Nene, M.D., Vienna, VA  
Chelsea Neumann, M.D., Warwick, RI  
Amy Lee Newhouse, M.D., Durham, NC  
Lisa Nguyen, M.D., Honolulu, HI  
My Phon Thi Nguyen, M.D., Wauwatosa, WI  
Sarah Nguyen, M.D., Hamden, CT  
Mary Elizabeth Nielsen, D.O., Saint Louis Park, MN  
Brandon Niemeier, M.D., Carlsbad, CA

Cara Niemeier, M.D., Carlsbad, CA  
Srikanth Nimmagadda, MD, Myrtle Beach, SC  
David Lewis Nisenbaum, M.D., Costa Mesa, CA  
David Asher Nissan, M.D., Norfolk, VA  
Krystal Nizar, M.D., South San Francisco, CA  
Ijeoma Jennifer Njoku, M.D., Philadelphia, PA  
Uchechukwu Nnamdi, M.B.B.S., Bronx, NY  
Eric Marlis Noble, M.D., Los Angeles, CA  
Fatima Noorani, M.D., Vienna, VA  
Jordan Lee Nordquist, M.D., Austin, TX  
Wanda Novel Norris, M.D., West Bloomfield, MI  
Janet Marie Nunn, M.D., Camp Lejeune, NC  
Robert Floyd Nuss, M.D., Hartford, SD  
Ziyad Bahij Nuwayhid, M.D., Anaheim, CA  
Nnennaya Nwokeji, M.D., Antioch, CA  
Srijana Shrestha O'Connell, M.D., Columbia, MO  
Ryan O'Connor, M.D., Seattle, WA  
Jennifer M O'Keefe, M.D., New York, NY  
Mary Colleen O'Rourke, M.D., Washington, DC  
Adesuwa Lenora Obasuyi, M.D., Baldwin, NY  
Glenn Arthur Occhiogrosso, MD, New York, NY  
Kelly Meredith Ochoa, M.D., Providence, RI  
Christopher OConnell, M.D., Stanford, CA  
Abimbola Odukoya, D.O., Piscataway, NJ  
Kelechi Ogbuji, M.B.B.S., Baldwin, NY  
Olufemi Ogundeji, M.B.B.S., Shreveport, LA  
Michael Jacob Okasinski, MD, Norfolk, VA  
Stanley Okon, M.D., Naperville, IL  
Akinkunmi O. Oladiran, M.D., Dyersburg, TN

Jonathan Howard Oliver, M.D., Euclid, OH

Luis Javier Olivera Rodriguez, M.D., Saint Cloud, FL

Aviva Olsavsky, M.D., Lakewood, CO

Molly Joanne Orcutt Woods, D.O., Fargo, ND

Andrew Orr, M.D., Hamilton, NJ

Dennis Orwat Jr, M.D., Charleston, SC

Kenneth Osiezagha, M.B.B.S., Minot, ND

David Osuna, M.D., Glenville, NY

Joseph Otonichar, D.O., New York, NY

Heather Oxentine, M.D., Decatur, GA

Gbolahan Oyinloye, M.B.B.S., Columbia, MO

Govind Bhikhalal Oza, M.D., Floral Park, NY

Lauren Pace, D.O., Oak Brook, IL

Bhuvaneshwar Pagadala, M.D., DUBLIN, CA

Silky Pahlajani, M.D., New York, NY

Anna Paley, D.O., Washington, DC

Katherine June Palm-Cruz, M.D., Seattle, WA

James Palmer, D.O., Medford, MA

Shashwat Pandhi, M.D., Philadelphia, PA

Aditi Parashar, M.B.B.S., El Centro, CA

Iman Parhami, M.D., Tarzana, CA

Nishant Parikh, M.D., Richmond, VA

Rishi Mahesh Parikh, M.D., Pittsburgh, PA

Priscilla Park, MD, Junction City, OR

Ankit Anilkumar Parmar, M.B.B.S., Grand Prairie, TX

Aimee Elizabeth Patel, M.D., Indianapolis, IN

Dhaval Patel, M.D., La Habra, CA

Kinjal S Patel, D.O., Scottsdale, AZ

Mihir Patel, M.D., NORFOLK, VA

Milapkumar R. Patel, M.D., Weddington, NC  
Seeta Patel, M.D., Seattle, WA  
Mitali Patnaik, M.D., Philadelphia, PA  
Daniel Patterson, M.D., Bronx, NY  
Morgan Patterson, M.D., Durham, NC  
Vikas Pattu, MD, Melbourne, FL  
Nysa Marinda Paysour, M.D., gainesville, VA  
Rebecca Peak, M.D., Westborough, MA  
Holly Peek, M.D., Boston, MA  
Allison Roseanne Peklansky, D.O., Brookhaven, GA  
Piotr Pelc, D.O., Miami, FL  
Satya Sesha Sai Varma Penumetcha, M.D., East Haven, CT  
Jose Pereira, MD, San Antonio, TX  
Alba Pergjika, M.D., St. Louis, MO  
Nicole Nguyen Perras, M.D., Washington, MD  
Emily Catherine Perry, M.D., Saint Louis, MO  
Stephen David Pesanti, M.D., Pittsburgh, PA  
Eva Correa Pessequeiro, M.D., Los Angeles, CA  
Tolulope Peters, M.D., Vestavia Hills, AL  
Whitney Elise Peters, M.D., Boston, MA  
Anthony Petersen, M.D., Salt Lake City, UT  
Ryan Peterson, M.D., New Haven, CT  
Pete Petriashvili, M.D., Pasadena, CA  
Aleksandra Panov Phillips, M.D., West Greenwich, RI  
Justyna Piasecka, M.D., New Haven, CT  
Walter Piddoubny, M.D., Stony Brook, NY  
Brian Michael Pierson, M.D., Las Vegas, NV  
Malathi Pilla, M.B.B.S., Las Cruces, NM  
Subhash Pinnaka, M.B.B.S., Johnstown, PA

Joseph Pino, M.D., Coral Gables, FL  
Erika Pizarro, M.D., Daly City, CA  
Carter David Poage, M.D., Jersey Village, TX  
Scott Robert Polick, D.O., Ann Arbor, MI  
Rachel Poliquin, M.D., Chapel Hill, NC  
Sara Popkin, M.D., Hillsborough, NJ  
Nabilla Shiraz Porbandarwalla, M.D., Kirkland, WA  
Maria Cristina Poscablo-Stein, M.D., Atlanta, GA  
Justin Andrew Powell, M.D., Little Rock, AR  
Samantha Dyan Powell, M.D., San Francisco, CA  
Albert Powers, M.D., Hamden, CT  
Laura Sanford Powers, M.D., New York, NY  
Zachariah David Pranckun, D.O., Philadelphia, PA  
James Prickett, D.O., Tucson, AZ  
Natalie Ann Prohaska, M.D., Aurora, CO  
Matthew David Jonathan Prok, M.D., Denver, CO  
Michael Blaise Przydzielski, M.D., Hanover, NH  
Chad C Puffer, D.O., Rochester, MN  
Sarah Adele Pullen, M.D., Boise, ID  
Padmaja Puppala, M.D., Southlake, TX  
Muhammad Rehan Puri, M.B.B.S., Vernon, CT  
Huma Qadir, M.D., Schenectady, NY  
Syed Qamer, M.D., Owings Mills, MD  
Shujaat Qayyum, M.D., Tarrytown, NY  
Michael Minh Quach, M.D., San Jose, CA  
Yu Lily Quan, M.D., League City, TX  
Keith M Quirino, D.O., Lafayette, CA  
Naema Qureshi, M.D., Brookline, MA  
Shayan Rab, M.D., Encino, CA

Marco Antonio Rabines Burga, M.D., Bradenton, FL

Rajiv Radhakrishnan, M.B.B.S., New Haven, CT

Matthew Joseph Radler, M.D., Auburn, MI

Andrew Radu, M.D., Washington, DC

Frank J Ragukonis Jr, M.D., Honolulu, HI

Mohammed A Rahemtulla, D.O., West Allis, WI

Harita Raja, MD, Bethesda, MD

Jemila Raji, M.B.Ch.B., Hamilton, OH

Pallavi Rajput, M.B.B.S., Sacramento, CA

Veena Raju, M.D., Brookline, MA

Sanjeev Rally, M.D., Atlanta, GA

Pamela Joann Ralph, M.D., Moorestown, NJ

Natalia Ramos, M.D., West Hollywood, CA

Samardeep Randhawa, M.D., Rockville, MD

Veronica M. Raney, M.D., Little Rock, AR

Nikhil Pillariseti Rao, M.D., Gainesville, FL

Vinod Rao, M.D., Cambridge, MA

Mary Ann Rasku, M.D., Milwaukee, WI

Shervin Ravan, M.D., Brooklyn, NY

Hashim Raza, M.D., Bloomfield Hills, MI

Mahreen Raza, M.B.B.S., Avon, CT

Thomas Recore, M.D., Madison, MS

Sindhura Reddiwandla Reddy, D.O., La Jolla, CA

Cache Reed, M.D., Zirconia, NC

Matthew Joseph Reed, M.D., Davis, CA

Galya Rees, MD, Culver City, CA

Nicholas Reid, M.D., Chicago, IL

Gillian Winton Reiersen, M.D., San Mateo, CA

Jesse Reinking, D.O., Reno, NV



Jose M Rengifo, M.D., Pawtucket, RI  
Aizhan Tyndybekova Repchak, M.D., Falls Church, VA  
Domingo Alberto Reyes, M.D., Pembroke Pines, FL  
Joy Reyes, M.D., Stratford, CT  
Magdalena Reyes, M.D., Brighton, MA  
Ramteen Rezai, M.D., Northborough, MA  
Colette Laquey Riahi, M.D., Sugar Land, TX  
Sheraz Riaz, M.B.B.S., Springfield, VA  
Usman Syed Riaz, M.B.B.S., North Woodmere, NY  
Isabel A Ribeiro Caldas Domingues, M.D., La Jolla, CA  
Alexandra K Rice, M.D., Easton, MD  
Misty Charissa Richards, MD, Los Angeles, CA  
Elizabeth J. Richardson, M.D., Baltimore, MD  
Anna Frenklach Rief, M.D., Palo Alto, CA  
Brandon Scott Riley, M.D., Tyler, TX  
Dawn Marie Risley, D.O., Fresno, CA  
Alexis Dora Ritvo, M.D., Denver, CO  
Tenley Jean Rivera, M.D., Seattle, WA  
Sonia Riyaz, M.D., New York, NY  
Syed Khalid Rizvi, M.D., Lexington, KY  
Waqar Rizvi, M.D., Hamden, CT  
Katherine Jane Robertson, M.D., Omaha, NE  
Veronique Haymon Robins-Brown, M.D., New Orleans, LA  
Natalie Lauren Robinson, M.D., Temecula, CA  
Barbara Franci Robles-Ramamurthy, M.D., Philadelphia, PA  
Jenny Paola Rodriguez Alzate, M.D., Miami, FL  
Lisette Rodriguez-Cabezas, M.D., Chicago, IL  
Hannah Roggenkamp, M.D., Seattle, WA  
Rachel VF Rohaidy, M.D., Miami, FL

Cody Roi, D.O., New Orleans, LA  
Tracey Roiff, M.D., New York, NY  
Courtney Romba, M.D., Chicago, IL  
Jordan Romero, M.D., Norfolk, VA  
Anne Rose, M.D., Brookline, MA  
Jake Rosenberg, M.D., Philadelphia, PA  
Sarah Ross, M.D., Bronx, NY  
Kamalika Roy, M.B.B.S., Ann Arbor, MI  
Writtika Roy, M.D., Dallas, TX  
Julia Margaret Ruark, M.D., M.P.H, Seattle, WA  
Hilja Ruegg, M.D., Cincinnati, OH  
William D. Rumbaugh Jr., M.D., Georgetown, TX  
Joshua Russell, M.D., East Amherst, NY  
Leigh J. Ruth, M.D., Baltimore, MD  
Michael Todd Rutherford, M.D., Kalispell, MT  
Osman Saeed, M.D., Louisville, KY  
Reza Safavi, M.D., San Francisco, CA  
Nischal Sagar, M.D., Kansas City, KS  
Babar Majeed Saggu, M.B.B.S., Forest Hills, NY  
Vanita Sahasranaman, M.D., Coral Springs, FL  
Sindhura N Saini, M.D., Saint Louis, MO  
Mohamedlatif Saiyad, M.B.B.S., Marietta, OH  
Sara Sala, M.D., Waterford, CT  
Jamal Saleh, M.D., Commerce Twp, MI  
Kelsey W. Salzberg, M.D., San Luis Obispo, CA  
Jessica Christine Samples, M.D., Nashville, TN  
Ayol Samuels, M.D., Bronx, NY  
Ana San Martin, M.D., Chevy Chase, MD  
Lisa Sanchez, M.D., Louisville, KY

Venice Anne Lopez Sanchez, MD, Irvine, CA  
Juan Sanchez-Ramirez, M.D., Minneapolis, MN  
Nicholas Ryan Sandersfeld, D.O., Spokane, WA  
Yesenia Santana-Rosado, M.B.B.S., Minneapolis, MN  
Janaka Sarathchandra, M.D., Tucson, AZ  
Shree Nitya Sarathy, M.D., Woodbridge, VA  
Suresh Sarma, M.D., Punta Gorda, FL  
Jonathan Earl Sarsiat, D.O., Phoenix, AZ  
Dean Sasaki, M.D., Fountain Valley, CA  
Sheila Mendez Sasieta, D.O., Inver Grove Heights, MN  
Brittany Sauerborn, M.D., Beaufort, SC  
Kathryn Anne Saunders, M.D., Boerne, TX  
Adria Savino, M.D., Tampa, FL  
Summer Patricia Savon, M.D., Oakland, CA  
Gregory Robert Sayer, M.D., New York, NY  
Timothy Scarella, M.D., Boston, MA  
Alexandra Schick, M.D., Charleston, WV  
Shirin Schilling, M.D., West Hartford, CT  
David Andrew Schlagel, MD, Eau Claire, WI  
Mariana Schmajuk, M.D., New York, NY  
David Kirkland Schmidt, D.O., Chesterfield, MO  
Katharina Laura Schneiber, M.D., La Jolla, CA  
Brooke Patricia Schneider, D.O., Fort Collins, CO  
Meghan Marie Schott, D.O., Chicago, IL  
Justin Warren Schreiber, D.O., Pittsburgh, PA  
Sarah Schroeder, M.D., Brooklyn, NY  
Lee Schuhmann, M.D., Louisville, KY  
Jason Schweitzer, M.D., San Diego, CA  
Adam Scioli, D.O., Rydal, PA

Merlyn Scoggin, M.D., Jurupa Valley, CA  
Robert Christopher Scott, M.D., White River Junction, VT  
Christina D Scully, M.D., Providence, RI  
James Donald Seaver, MD, Union City, CA  
Seena Rose Sebastian, M.D., LAKE HIAWATHA, NJ  
Alexis Ann Seegan, M.D., Orange, CA  
Surinder Rana Sehdev, M.D., Chicago, IL  
Priya Sehgal, M.D., Arlington, MA  
Claire Randall Selinger, M.D., Emerald Hills, CA  
Kanwardeep Singh Sethi, M.B.B.S., Meredith, NH  
Karthik Parasuraman Sethuram, D.O., Santa Clarita, CA  
Laura Jeanine Seymour, M.D., Spokane, WA  
Kamleh Shaban, M.D., Louisville, KY  
Sara Roya Shadaram, M.D., Cleveland, OH  
Ravi Navin Shah, M.D., New York, NY  
Sarah Alia Shah, M.B.B.S., Agoura Hills, CA  
Stephanie Sapna Shah, M.B.B.S., Columbia, SC  
Zarna Shah, D.O., Jersey City, NJ  
Arif Shahabuddin, M.D., Albany, NY  
Khurram Rafi Shaikh, M.D., Tomball, TX  
Nazneen Shakeel, M.B.B.S., Mississauga, ON  
Marat Nadirovich Shamsutdinov, M.D., Valley Village, CA  
Abhinav Sharma, M.D., Miami, FL  
Ira Devayani Sharma, M.D., Valencia, CA  
Rahul Sharma, M.D., Hoffman Estates, IL  
Christopher Stephen Sharp, M.D., Denver, CO  
Brad Shattuck, M.D., Boston, MA  
Patricia Shaw, M.D., Morgantown, WV  
Julia Shekunov, M.D., Cambridge, MA

Neeta Shenai, M.D., Pittsburgh, PA  
Sheela Shenoy, M.D., Edison, NJ  
Gregory Sherman, M.D., Penfield, NY  
Sarah M Sherman, D.O., Lakewood, CA  
Victor Sherrel, M.D., New Orleans, LA  
Nima Sheth, M.D., Washington D.C., DC  
Anna Shier, D.O., Scottsdale, AZ  
Swati Shivale, M.D., Atlanta, GA  
Sharvari Pradip Shivaneekar, M.B.B.S., New York, NY  
Humaira Shoaib, M.B.B.S., New Hyde Park, NY  
Himal P Shrestha, D.O., Lakewood, CO  
Priya Shrestha, M.D., solon, OH  
Sandeep Kumar Shrestha, M.B.B.S., Ardmore, OK  
Matisyahu Y Shulman, M.D., Teaneck, NJ  
Todd Shumard, M.D., Kalispell, MT  
Laura Therese Sidari, M.D., San Antonio, TX  
Rafik Shawki Badie Sidaros, M.B.Ch.B., New Haven, CT  
Fatima Siddiqui, M.D., Glen Oaks, NY  
Maaz Siddiqui, M.D., Philadelphia, PA  
Rehan Ahmed Siddiqui, M.D., Cedar Grove, NJ  
Simon Sidelnik, M.D., New York, NY  
Martin Sievert, M.D., La Crosse, WI  
Kathryn L Sigalow, M.D., New Orleans, LA  
Andrew Richard Silva, M.D., Sterling Heights, MI  
Nicole M Silva, M.D., Tripler Army Medical Center, HI  
Charmaine Guballa Silva-Gata, M.D., Virginia Beach, VA  
Sabrina Silva-McKenzie, M.D., Sacramento, CA  
Alicia Silvestrini, M.D., Dallas, TX  
Ryan Michael Silwanowicz, M.D., Chelsea, MI

Elisa Simon, M.D., Orange Park, FL  
Annabelle Simpson, M.D., Renton, WA  
Aman Deep Singh, M.D., San Leandro, CA  
Jaswinderjit Singh, M.B.B.S., Malverne, NY  
Sonal Sinha, M.D., Shelby, OH  
Brian Michael Skehan, M.D., Ph.D., West Boylston, MA  
Maja Skikic, M.D., Nashville, TN  
Donnesha Slider, M.D., Pittsburgh, PA  
Michael Slifer, MD, Lake Worth, FL  
Claire Lise Slocumb, M.D., Augusta, GA  
Piotr Slowik, M.D., Brooklyn, NY  
Amy Smalley, M.D., Columbia, SC  
Brandon Robert Smith, M.D., New York, NY  
Christina Beatrice Smith, M.D., Houston, TX  
Erin K Smith, M.D., Pittsburgh, PA  
Lisa Christine Smith, M.D., Denver, CO  
Mycroft Matthias Smith, M.D., denver, CO  
Richard Patrick Smith, D.O., Winston Salem, NC  
Erica Warren Snook, M.D., Dallas, TX  
Kanishk Solanki, M.D., New York, NY  
Daniela Solzbacher, M.D., Slc, UT  
Trudie Somberg, D.O., Philadelphia, PA  
Youeun Song, M.D., Pittsburgh, PA  
Isabella Soreca, M.D., Pittsburgh, PA  
Jamie Lee Sorenson, M.D., Denver, CO  
Michael Soule, M.D., Natick, MA  
Nathaniel Sowa, M.D., Seattle, WA  
Lewis M Spirtos, M.D., Canfield, OH  
Ilene Beth Spitzer, M.D., Portsmouth, NH

Wendy Stahl, M.D., New York, NY  
Rebekah Stalter, M.D., Longview, TX  
Meghan Noel Starner, M.D., Havertown, PA  
Rachel State, M.D., Chapel Hill, NC  
Jenna Steele, D.O., Charleston, SC  
Nicholas Stevens, M.D., New York, NY  
Paul Taylor Stevens, M.D., Salt Lake City, UT  
Michalene Marie Stevermer, D.O., Esko, MN  
Adriana Stewart, D.O., Jesup, GA  
Bradley Louis Stilger, M.D., Ann Arbor, MI  
Matthew Eugene Stohs, M.D., Rochester, MN  
Katia Stoletniy, M.D., Loma Linda, CA  
Jennifer Reichel Stolin, M.D., Hanahan, SC  
Lauren Molly Stossel, M.D., New York, NY  
Heather Straccia, M.D., New York, NY  
Brittany Strawn, M.D., Durham, NC  
Seth Studer, M.D., Tucson, AZ  
Frank Ryan Stump, M.D., Johnson City, TN  
Alan Su, M.D., Charleston, SC  
Frederick Yanfeng Su, M.D., Sacramento, CA  
Cory Suard, M.D., Napa, CA  
Ana Suarez, M.D., Port Saint Lucie, FL  
Archana Sugumar, M.B.B.S., Peoria, AZ  
Eliza Sukiennik, M.D., Rochester, MN  
Emily Sullivan, D.O., Medford, MA  
Gregory Sullivan, M.D., Riverview, FL  
Elizabeth Johnson Sumner, M.D., Durham, NC  
Daqiang Sun, M.D., Los Angeles, CA  
Ali R. Surahio, M.D., Linden, NJ

Leah C. Susser, M.D., White Plains, NY  
Amanda Swank, M.D., Bronx, NY  
Heather Elaine Swanson, M.D., Eagan, MN  
Amy Esther Swift, M.D., New York, NY  
Jonathan Sy, M.D., Honolulu, HI  
Rachel Joy Lim Sy-Layug, D.O., Honolulu, HI  
Aaron Tabor, M.D., Ardmore, OK  
Kara Sydelle Tabor-Furmark, M.D., Los Angeles, CA  
Sterling Tadlock, M.D., San Francisco, CA  
Kathreen Tadrous, M.D., Bayonne, NJ  
Jaspinder Tahim, D.O., M.P.H., Bakersfield, CA  
Rana Mohammad Tahir, M.B.B.S., Richmond Hill, NY  
Jeffery Takos, M.D., Stamford, CT  
Lynsey Tamborello, M.D., Houston, TX  
Prashanth R Tamragouri, M.D., Chicago, IL  
Yonghong Tan, M.D., New York, NY  
Yasas Chandra Tanguturi, M.B.B.S., Nashville, TN  
Michael Sterling Tanner, M.D., Las Vegas, NV  
Erin Louise Tansey, MD, Minnetonka, MN  
Michael Tanzer, M.D., Glen Cove, NY  
Philippe-Gerard Tapon, M.D., Chicago, IL  
Samir Tarpara, M.D., Glen Cove, NY  
Joshua J Tartaglione, D.O., San Diego, CA  
Igor Tatarintsev, D.O., Phoenix, AZ  
Jason Tatreau, M.D., Chapel Hill, NC  
Michelle Kana Tawa, M.D., Torrance, CA  
Samy Lewis Tawfik, M.D., North Fort Myers, FL  
Anne Preston Taylor, M.D., Raleigh, NC  
Jared Taylor, M.D., Flowood, MS



Jerome Henry Taylor Jr, M.D., New Haven, CT

Nadia Taylor, M.D., San Francisco, CA

Aviva Teitelbaum, M.D., Brooklyn, NY

Jessica Lynn Thackaberry, M.D., San Diego, CA

Neha Thapa, M.D., Green Bay, WI

Sarah Thayil, M.D., Baltimore, MD

Valerie Thertus, M.D., Roselle, NJ

Brian Bero Theyel, M.D., Providence, RI

Connie Thomas, M.D., Pacific Grove, CA

Katherine Thomas, M.D., Reno, NV

Allie Elizabeth Thomas-Fannin, M.D., Vincennes, IN

Anastasia Wermert Thompson, M.D., Riverside, RI

Olga Vadim Thompson, M.D., Kernersville, NC

Shruti A. Tiwari Ms., M.D., Rego Park, NY

Monica Joy Tone, M.D., Cleveland, OH

Emily Ellen Tonkin, D.O., New Orleans, LA

John Torous, M.D., Brookline, MA

Chasity Torrence, M.D., Whitfield, MS

Duy Tran, M.D., Baton Rouge, LA

Paula Tran, M.D., Stanford, CA

Anna Katharina Trede, M.D., Falmouth, ME

Sumi Treesa Cyriac, M.D., Livonia, MI

Jenevieve Duron Treiser, M.D., Cambridge, MA

Nicole Tremblay, M.D., Rexford, NY

Darcy Trenkle, M.D., Redlands, CA

Stephen Trevick, M.D., Chicago, IL

Corey Allen Trobaugh, D.O., Indianapolis, IN

Andrew Truccone, D.O., Independence, MI

Daniel J Tseng, M.D., Honolulu, HI

Christie Tsimoyianis, M.D., New York, NY

Adil Haji Arif Tumbi, M.B.B.S., Denver, CO

George Tun, M.D., Hemet, CA

Catharyn A. Turner II, M.D., Philadelphia, PA

Courtney Elizabeth Turner, M.D., Prestonsburg, KY

Margaret C Tuttle, M.D., Boston, MA

Melinda Tyler, M.D., Visalia, CA

Zia Uddin, M.D., Richmond, VA

Azuka D. Udolisa, M.B.B.S., Richmond, TX

Alice Uflacker, M.D., Belmont, MA

Deepa Ujwal, M.B.B.S., Dublin, OH

Arundhati Undurti, M.D., Battleground, WA

Jaspreet Uppal, M.D., Jersey City, NJ

Peter Ureste, M.D., San Francisco, CA

Justin Uzl, M.D., West Hartford, CT

Leila Mariam Vaezazizi, M.D., New York, NY

Kuldeep Vaghela, MD, University Heights, OH

Vikram Vaka, M.D., Columbus, OH

Guillermo Valdes Montemayor, M.D., New York, NY

Violeta Valdivia, M.D., Jamaica Plain, MA

Celeste Erika Valencia, M.D., New Haven, CT

Emiliano Valles, M.D., Albuquerque, NM

Robin E Valpey, M.D., Pittsburgh, PA

David Van Norstrand, M.D., Somerville, MA

Gerrit van Schalkwyk, M.D., Berlin, CT

Jacqueline Vanderburgh, M.D., Dublin, OH

Stelios Vantelas, M.D., Honolulu, HI

Enrique Vargas, M.D., Tampa, FL

Celia Varghese, M.D., Philadelphia, PA

Chinedu Onyedike Varma, M.D., Ellicott City, MD  
Shilpika Rani Varma, M.D., Brooklyn, NY  
Rubiahna Vaughn, M.D., New York, NY  
Timothy Melvin Veal, M.D., San Diego, CA  
Thomas Veeder, M.D., Portland, OR  
Glenn Vega, M.D., Los Angeles, CA  
Kimberly Anne Venable, M.D., Grayson, GA  
Janani Venugopalakrishnan, M.B.B.S., Sunnyvale, CA  
Chittranjan Verma, M.B.B.S., Edmond, OK  
Sagar Amit Vijapura, M.D., Jacksonville, FL  
Andres Vinuela, MD, New York, NY  
Sundeep Viridi, M.D., Philadelphia, PA  
Eugene German Vitiello, M.D., Norman, OK  
Robert Voloshin, D.O., Hilo, HI  
Jennifer Gomberg Votta, D.O., East Lansing, MI  
Jonathan Vu, M.D., Madison, WI  
John Vukelich, M.D., Minnetonka, MN  
Rushi Hasmukh Vyas, M.D., Arlington, VA  
Richard K. Wagner, M.D., Milton, WI  
Teresa E Walker, M.D., Louisville, KY  
Michael Gary Walsh, M.D., Pella, IA  
Hang Wang, M.D., Rockville, MD  
Heather Warm, M.D., San Francisco, CA  
Ashaki Eva Warren, M.D., Cincinnati, OH  
C Renee Washington-Hyde, M.D., Estero, FL  
Alicia Watson, M.D., Durham, NC  
Hans Watson, D.O., Great Falls, MT  
Kevin Grant Watson, M.D., Oklahoma City, OK  
Kristina L Wattier, M.D., Stevens Point, WI

Daron Watts, M.D., Dayton, CA  
Mahalia Way, M.D., Atlanta, GA  
Nawal Weaver, M.D., Greenville, SC  
John Weiffenbach, M.D., Kettering, OH  
Kamile Melek Weischedel, MD, SLC, UT  
Emily Welle, M.D., Fargo, ND  
Andrew Everett Weller, M.D., Merion Station, PA  
Jill Welte, M.D., Cranston, RI  
Isela Arrieta Werchan, M.D., Austin, TX  
Nicole Westercamp, M.D., San Mateo, CA  
Christopher White, M.D., Pacific Grove, CA  
Matan White, M.D., Dallas, TX  
Suzan White, D.O., Charlotte, VT  
Maurice Anthony Wiggins, M.D., Long Beach, CA  
Lindsey Ann Wilbanks, M.D., Little Rock, AR  
Ryan Wilke, D.O., Escondido, CA  
Scott Wilke, M.D., San Francisco, CA  
James Wilkins, M.D., Boston, MA  
Samuel Wilkinson, M.D., Hamden, CT  
Aislinn Williams, M.D., Ann Arbor, MI  
Jason Burke Williams, MD, Alexandria, VA  
Thomas Alfred Williams, IV, M.D., Charleston, WV  
Rachel Ann Winer, M.D., Portola Valley, CA  
Chris Winfrey, M.D., Palmyra, NJ  
David Christopher Winters, M.D., Austin, TX  
Elizabeth Anne Wise, M.D., Baltimore, MD  
Eric Nicholas Wittrock, D.O., Saint Louis, MO  
Jennifer Wlodarski, M.D., SLC, UT  
XiXi Wong, M.D., Memphis, TN

Christopher A Wright, D.O., Vermilion, OH

Rachel Hope Wright, M.D., Dallas, TX

Whitney Alexandra Wright, M.D., Ann Arbor, MI

Chen-Ying Wu, M.D., Pittsburgh, PA

Martin Wu, M.D., San Gabriel, CA

John Francis Wurzel III, M.D., Spokane Valley, WA

Kelly Elizabeth Wurzel, M.D., Spokane Valley, WA

Christopher K Wyatt, M.D., Burkburnett, TX

Emily Wynne, M.D., Bellerose, NY

Yang Xu, M.B.B.S., San Jose, CA

Deep Yadava, M.D., Bridgeport, WV

Keisha Ann Yahagi, M.D., Fort Worth, TX

Svetlana Yakov, M.D., Birmingham, AL

Chong Yang, D.O., Lawrenceville, GA

Sridhar Yaratha, M.D., Glen Allen, VA

Junko Yasuda-Free, D.O., Gig Harbor, WA

Liwen Ye, M.D., Staten Island, NY

Arvind Yekanath, M.D., Scottsdale, AZ

Elif Yilmaz, M.D., Solon, OH

Hong Yin, M.D., Milwaukee, WI

Jeein Yoon, M.D., Philadelphia, PA

Yesie Yoon, M.D., Vestavia, AL

Jillian Emiko Yoshimoto, D.O., Honolulu, HI

Kristen Yost, D.O., Camp Hill, PA

Shumaila Younas, M.B.B.S., Ann Arbor, MI

Angie Yu, M.D., Sacramento, CA

Lynn Marie Yudofsky, M.D., Menlo Park, CA

Alexander Kingston Yuen, M.D., Chicago, IL

Andriy Yuryev, M.D., Bronx, NY

Muhammad Khalid Zafar, M.B.B.S., Midland, TX  
Mustafa Husnain Zaidi, M.D., Highland Village, TX  
Zafar Haider Zaidi, M.D., Magnolia, TX  
Karl Zate, M.D., Levittown, NY  
Jozef Zelenak, M.D., Columbia, SC  
Beth Rachel Zell, D.O., Bronx, NY  
QIANG ZENG, M.B.B.S., ARLINGTON, MA  
Gus Qiong Zhang, M.D., Irving, TX  
Layan Zhang, M.D., North Potomac, MD  
Jeff Guanbo Zhao, M.D., Philadelphia, PA  
Gening Zhu, M.D., Greenville, NC  
Bradley Aaron Zicherman, M.D., Saint Petersburg, FL  
Jonathan Gil Zilberstein, M.D., New York, NY  
Amethyst Kathleen Zimmerman, D.O., Oceanside, CA  
Kathryn Alexandra Zioto, M.B.B.S., Boston, MA  
Lauren Zohler, D.O., Washington, DC  
Jessica Erin Zoltani, M.D., Cambridge, MA  
Atika Zuber, M.B.B.S., Belleville, NJ  
Zachary Zuschlag, D.O., Charleston, SC

**Psychiatry Maintenance of Certification, February 1, 2016**

Chester Bruce Abbott, M.D., Pasadena, CA  
Ehab Salem Abdelkriem Abdallah, M.D., Scottsdale, AZ  
Mohamed Abdelhameed, M.D., Evansville, IN  
Nagui Achamallah, M.D., Pleasant Hill, CA  
Daniel Acosta, M.D., Greenville, NC  
Marcia Jane Adelman, M.D., LEBANON, OH  
Smita Agarkar, M.D., Weehawken, NJ  
Jose Alberto Agosto, M.D., Chandler, AZ

Bushra Farooq Ahmad, M.D., Imperial, CA  
Maha Ahmad, M.D., Rego Park, NY  
Seeme Vadood Ahmad, M.D., Stone Mtn, GA  
Seth George Aidinoff, M.D., New York, NY  
Adonis Simon Al-Botros, M.D., Edmond, OK  
Yesne Alici, M.D., New York, NY  
Melissa Victoria Almeida, M.D., Toa Baja, PR  
Lee Scott Altman, M.D., Sharon, MA  
Terako San Tara Amison, M.D., Nashville, TN  
Laura Carmen Ancona, M.D., Staten Island, NY  
Jeffrey Lawrence Anders, M.D., Madison, WI  
Mary Iva Anderson, M.D., Austin, TX  
Ney F. Andujar, M.D., Port St Lucie, FL  
Michelle Kosche Anfang, M.D., Longmeadow, MA  
Zurya Shakeel Anjum, M.D., Sartell, MN  
Bruce David Appelbaum, M.D., San Juan Capistrano, CA  
Melissa Rae Arbuckle, M.D., Ph.D., New York, NY  
Vassili Valerievich Arkadiev, M.D., York, PA  
Thomas Alan Armistead, M.D., Philadelphia, PA  
Mary Elizabeth Arms, D.O., Weatherby Lake, MO  
David Sinclair Arnold, M.D., Baltimore, MD  
Gowri Arulanantham, M.D., Export, PA  
Nelson Kwadwo Asante, M.D., Scranton, PA  
Kathleen Dawn Askland, M.D., Penetanguishene, ON  
Abila Farah Awan, M.D., Irving, TX  
Bryan Lee Bacon, D.O., APO, AE  
Joe A. Baez, M.D., New York, NY  
Len Douglas Balke, M.D., Prescott, AZ  
Adrienne Martha Balsam, M.D., Glenview, IL

Sanjay Banerjee, M.D., Farmington, CT  
Raghunath Bansal, M.D., Fairfield, CA  
Alexander Sasha Bardey, M.D., New York, NY  
John Erol Barkenbus, M.D., Charlotte, NC  
Richard Vance Barnes, M.D., Tucson, AZ  
Benny Lynn Barnhart, M.D., Wichita Falls, TX  
Andres Barrera, M.D., Doral, FL  
Matthew James Barry, D.O., Rochester, NY  
Aramys Barzaga, M.D., Miami, FL  
Stella Ekaette Basse, M.D., Roanoke, VA  
Andrea Rose Bates, M.D., Reno, NV  
Carolyn Jean Baxter, M.D., Green Bay, WI  
Hope C. Beatte, M.D., Aurora, CO  
Joseph Donald Behrmann, M.D., Saint Louis, MO  
Michael Anthony Bell, M.D., Shaker Heights, OH  
Paul Frederick Belliveau, M.D., Exeter, NH  
Olusegun Adebowale Bello, M.D., Abilene, TX  
Tanya J. Bennett, M.D., Bellaire, TX  
Abigail Louise Benson, M.D., Wilmette, IL  
Gianpaolo Bentivoglio, M.D., Hanover, NH  
Tami Dianne Benton, M.D., Cherry Hill, NJ  
Jennifer Jane Bermudez, M.D., Lakewood Ranch, FL  
Emily Beth Bernstein, M.D., Wayne, PA  
Savita Sanjay Bhat, M.D., Chesterfield, MO  
Mahendra Takashi Bhati, M.D., Los Altos, CA  
Renu Bhatia, MBBS, Greer, SC  
Oscar Joseph Bienvenu III, M.D., Baltimore, MD  
Brian Francis Bladykas, M.D., Seminole, FL  
Mary C. Blinder, M.D., New York, NY



Ignacio Bobes, M.D., Coral Gables, FL  
Moiria Uskokovic Bogrov, M.D., Baltimore, MD  
Syed Asad Hassan Bokhari, MBBS, Marriottsville, MD  
Stephen Lawrence Borodkin, M.D., Tempe, AZ  
Daniel Street Boyd, M.D., Memphis, TN  
Mark Vincent Bradley, M.D., New York, NY  
Ricque Lynn Brister, M.D., Coronado, CA  
Suzanne Frances Brodbeck, M.D., Monclova, OH  
Carla Stephanie Brown, M.D., Middle River, MD  
Michael Lamar Brown, M.D., Lake Charles, LA  
William Loren Brown, M.D., Spokane, WA  
Katherine Piyaka Buchowski, M.D., M.P.H., Saint Louis, MO  
Thomas William Buenker, M.D., Scottsdale, AZ  
Emerson Bumanglag Bueno, M.D., Scottsdale, AZ  
Lubna Bukhari, M.D., Sewickley, PA  
Paul Ugo Bulgarelli, D.O., Weirton, WV  
Kim Dawn Alina Bullock, M.D., Burlingame, CA  
Richard M. Bunt, M.D., Melbourne, FL  
Teresa Lynn Buot-Smith, M.D., Phoenix, AZ  
Philip Ross Burke, MD, MPH, Chestnut Hill, MA  
Timothy Robert Burke, M.D., Los Angeles, CA  
Arlene Regina Burton, M.D., Sacramento, CA  
Natalya Bussel, M.D., Marina Del Rey, CA  
Sheri Ann Butler, M.D., Seattle, WA  
Jason Patrick Bynum, M.D., Elk Grove, CA  
Sue Ann Callison, M.D., Janesville, WI  
Catherine C. Camilleri, M.D., Woodridge, IL  
Christine Lynn Campbell, M.D., Gfafb, ND  
Joseph Peter Cannavo, M.D., Centennial, CO

Deborah Cano, M.D., Chicago, IL  
Basilisa Haydee Canto, M.D., Roslyn, NY  
Sarah Ann Caraisco, M.D., New York, NY  
Dora Luisa Cardenas, M.D., New Jersey, NJ  
Padraic Edmund Carr, M.D., Edmonton, AB  
Margaret Mary Casey, M.D., Grosse Ile, MI  
Rebecca Castro, M.D., Seguin, TX  
Lober Guillermo Cervantes, M.D., Holtsville, NY  
Dariusz Ryszard Chacinski, M.D., Pennington, NJ  
Ritu Chahil, M.D., Falls Church, VA  
Edward Nien-Fei Chai, M.D., Armonk, NY  
Vanessa Quyen Chang, M.D., Kenosha, WI  
Nivedita Chaudhry, M.D., Raleigh, NC  
Gregory Louis Cherpes, M.D., Pittsburgh, PA  
Sunil Chhibber, M.D., Louisville, KY  
Uma Choday, M.D., Parkland, FL  
Miran Choi, M.D., Berkeley, CA  
Daniel Thomas Chrzanowski, M.D., New York, NY  
Jamie Wen-Wam Chu, M.D., Dayton, OH  
Robert Joseph Cirelli, M.D., Ft Lauderdale, FL  
Kelly J. Clark, M.D., Louisville, KY  
Nancy Miriam Clayton, M.D., Fairfax Station, VA  
Candace Agress Cohen, M.D., Madison, WI  
Gregory Aaron Cohen, M.D., Pasadena, CA  
Kent Allen Colburn, D.O., Nashville, TN  
Tiziano Colibazzi, M.D., New York, NY  
Joseph Kenneth Coll, M.D., Mt Pleasant, SC  
Edward Michael Collopy, M.D., Morris Plains, NJ  
Lillian Colon, M.D., White Plains, NY

Heidi Lynn Combs, M.D., Seattle, WA  
William Samuel Cook Jr., M.D., Jackson, MS  
Marjorie Rush Cooper, M.D., Allentown, PA  
Stephen Andrew Cox, M.D., Perrysburg, OH  
Kathleen Ann Coyle, M.D., METAIRIE, LA  
Jonathan Gentry Crisp, M.D., Glade Spring, VA  
Carmen Antonela Croicu, M.D., Redmond, WA  
JoAnn Yulo Crudo, M.D., Rancho Santa Margarita, CA  
Ping Cui, M.D., Acton, MA  
Malcom Cunningham, M.D., Jacksonville, FL  
Lucy L. Curtiss, M.D., Anchorage, AK  
Priscilla Martinez Cusi, M.D., North Las Vegas, NV  
John Vernon Custer, M.D., Charleston, SC  
Inna D'Empaire, M.D., Missouri City, TX  
Kevin Robert Dahmen, M.D., Bismarck, ND  
Zachariah Courtney Dameron III, M.D., Charlottesville, VA  
Tobias Dang, M.D., Seattle, WA  
Robert Barry Daroff Jr., M.D., San Francisco, CA  
Krista Jeanne David, M.D., Helena, MT  
Elizabeth Jane Davidson, M.D., Albuquerque, NM  
Bethany Brant Davis, M.D., Atlanta, GA  
Matthew Lane Davis, M.D., Granger, IN  
Molly Katherine Davis, M.D., Seattle, WA  
Steven R. Daviss, M.D., Baltimore, MD  
Deborah V. Deas, M.D., Charleston, SC  
Karl Alexander Deisseroth, M.D., Ph.D., Stanford, CA  
Anilla Del Fabbro, M.D., Albuquerque, NM  
Alex Ralph Demac, M.D., Middlebury, CT  
Diane Alice DeMallie, M.D., Colorado Springs, CO

Michele Joy Denker, M.D., Raleigh, NC  
Amanjot Kaur Deol, M.D., Modesto, CA  
Tushar Madhukar Desai, M.D., Austin, TX  
Vijay Kumar Dewan, M.D., M.B.B.S., Omaha, NE  
Ketan Arvind Dhadphale, M.D., west desmoines, IA  
Monica Dhingra, M.D., Mahwah, NJ  
Ochuko Gregson Diamreyan, M.D., San Bernardino, CA  
Jeanne Isabelle Dickens, M.D., Indianapolis, IN  
Anne Marie Dietrich-Ardura, M.D., Alexandria, VA  
Kourosh M. Dini, M.D., Chicago, IL  
Marija Djokovic, M.D., Keller, TX  
Toni Dollinger, M.D., Little Rock, AR  
Joselito B. Domingo, M.D., Morristown, NJ  
Mary Colleen Donnelly, M.D., Phoenix, AZ  
Frank G. Dowling, M.D., Oakdale, NY  
Ramona Dvorak, M.D., Cambridge, MA  
Aura Monica Eberhardt, M.D., Springfield, IL  
Natalia Eisenberg, M.D., Washington, DC  
Steve Arthur Eklund, M.D., Victorville, CA  
Donald Peter Eknoyan, M.D., Encino, CA  
Essam-Eldin Moussa Ellabbad, M.D., Englewood, NJ  
Iskander Derd Enikeev, M.D., Brooklyn, NY  
Carrie Lisa Ernst, M.D., New Rochelle, NY  
Uzma S. Faheem, M.D., Cary, NC  
Wajahat Faheem, M.D., Cumberland, RI  
Xiu-Di Fan, M.D., clarksville, MD  
Alina Yegishyeyvna Faramazyan, M.D., San Francisco, CA  
Julie Farrington, M.D., Austin, TX  
Omar Fattal, M.D., New York, NY

Dominic Joseph Ferro, M.D., Nanuet, NY  
Noel Figueroa, M.D., Oviedo, FL  
Barry Lynn Fisher, M.D., Washington, DC  
Keith A. Fisher, M.D., San Antonio, TX  
Stephanie Coffman Fitz, M.D., Beavercreek, OH  
Charles Andrew Fleischer, D.O., Rcho Santa Fe, CA  
Rachel Mary Fleissner, M.D., Fargo, ND  
Sasha Ali Flynn, M.D., Northborough, MA  
Robert Paul Forrest, M.D., North Little Rock, AR  
William Arthur Forsyth, M.D., Hayden, ID  
Geoffrey Mark Fortner, M.D., Carmel, IN  
Aaron Louis Frenz, M.D., Waban, MA  
Joan Evelyn Friedson, M.D., San Diego, CA  
Ruth E. Frydman, M.D., Cumberland, ME  
Andrew Carl Furman, M.D., Atlanta, GA  
Robert Brian Gaffney, M.D., Tahoe City, CA  
Elchin Gajiev, D.O., Brooklyn, NY  
Maria Elen P. Gajo, M.D., Gulf Breeze, FL  
Giampaolo Gallo, M.D., Philadelphia, PA  
Dennis Gelyana, M.D., MPH, Buffalo Grove, IL  
Srirupa S. Ghoshtagore, M.D., M.P.H., Columbia, MD  
Tamela Gayle Gilbert, M.D., Lexington, KY  
Reginald A. Givens, M.D., Rockford, IL  
Rachel Lynne Goldstone, M.D., Oakland, CA  
Maria Carmen V. Gonzales-Vigilar, M.D., Ashburn, VA  
Jeffrey Daryl Gordon, M.D., Marion, VA  
Vanessa Jean Gordon-Brown, M.D., Stone Mountain, GA  
Aruna Gottumukkala, M.D., Pearland, TX  
John W. Grace, M.D., Crystal River, FL

Charles Michael Grade, M.D., Wauwatosa, WI  
Alice Mary Graham-Brown, M.D., Deerfield, MA  
Amit Granot, M.D., Newton, MA  
Bradley David Grinage, M.D., Lawrence, KS  
Rita Jane Grogan, M.D., Glen Rock, NJ  
Linda Fern Gruenberg, D.O., Skokie, IL  
McLeod Frampton Gwynette, M.D., Charleston, SC  
Daniel Lee Hackett, M.D., Yorba Linda, CA  
Mina Hah, M.D., Davis, CA  
Susan Mackay Hakeman, M.D., Bellingham, WA  
Heather Louise Lyle Hall, M.D., Tulsa, OK  
James Patrick Hall, D.O., Cypress, CA  
Garrett Milo Halweg, M.D., Corona Del Mar, CA  
Jennifer Olmstead Hamilton, M.D., Corvallis, OR  
Ehtsham Ul Haq, M.D., Hoover, AL  
Mohammad Javedul Haque, M.D., Palm Beach Gardens, FL  
Jimmie Lee Harris, D.O., Okemos, MI  
Marla Hartzen, M.D., Park Ridge, IL  
Steven Arthur Harvey, M.D., Saint Louis, MO  
David Dewey Harwood, M.D., Montgomery, AL  
Evelyn Edith Hazlett, M.D., Fremont, CA  
Karen Sue Head, M.D., Prospect, KY  
Victoria Hendrick, M.D., Los Angeles, CA  
John David Hensala Jr., M.D., San Francisco, CA  
Hazem Herbly, M.D., Jacksonville, FL  
Richard Edward Herrick, D.O., Waterford, PA  
Jonathan Adam Hertz, M.D., M.P.H., Glen Ridge, NJ  
James Whitney Hicks, M.D., New York, NY  
Cheryl Anne Hill, M.D., Ph.D., Morgantown, WV

Donald M. Hilty, M.D., Davis, CA  
David Walter Hiott, M.D., Charleston, SC  
Thomas Holdbrook, M.D., Cherry Hill, NJ  
Akhtar Hossain, M.D., Califon, NJ  
David John Houlihan, M.D., La Crosse, WI  
Matthew Benijah Judson House, D.O., Clovis, CA  
Valerie E Houseknecht, M.D., Beavercreek, OH  
Claudia Annette Howard, M.D., Columbia, MD  
Eugene Jen-Wei Huang, M.D., Gettysburg, PA  
John Richard Hubbard, M.D., Ph.D., Tuscaloosa, AL  
Michael Gregory Huber, M.D., Charleston, SC  
Geraldine Sherry Huey You, M.D., Dallas, TX  
Noel McReynolds Hunt, M.D., Mt Pleasant, SC  
Ashraful Huq, M.B.B.S., Yorktown, VA  
Mohammed Farhan Iqbal Hussain, MBBS, Mississauga, ON  
Zina Muneer Hussain, M.D., Rockville, MD  
Ali El Tigani Ibrahim, M.D., Saginaw, MI  
Ricardo Enrique Irizarry, M.D., Mission, TX  
Allesa Paige Jackson, M.D., Tallahassee, FL  
Jay A. Jawad, M.D., Seattle, WA  
Manonitha Jayaweera, M.D., Strongsville, OH  
Timothy Ray Jennings, M.D., Chattanooga, TN  
Tamara Jeraj Dolenc, M.D., Santa Rosa, CA  
Scarline Marie Jerome-Kon, M.D., Homer Glen, IL  
Beth Anne Johnson, M.D., Louisville, KY  
David Robert Johnson, M.D., M.P.H., Centerville, MN  
Kathleen Shuck Johnson, M.D., Placitas, NM  
Olayinka Michael Johnson, M.D., Elkridge, MD  
Laura Stahl Jones, M.D., Glenview, IL

Nina T. Jordania, M.D., Naperville, IL  
Ricardo Esteban Jorge, M.D., Houston, TX  
Javed Ahmed Joy, M.D., Huntingdon Valley, PA  
Madhuri V. Kamble, M.D., Missouri City, TX  
Jane Jee-Sun Kang, M.D., Austin, TX  
Miyun C Kang, M.D., West Haven, CT  
Mohammad Karimi-Pashaki, M.D., Hingham, MA  
Robert Aaron Karr, M.D., Concord, MA  
Marina Katz, M.D., San Diego, CA  
Sidney Alan Kauzlarich, M.D., Omaha, NE  
Katherine Lynn Keeton, D.O., Denver, CO  
Ingrid Maria Kemperman, M.D., Sleepy Hollow, NY  
John Michael Kenny, M.D., Avondale, AZ  
Mary Kokinos Kentros, M.D., Scarsdale, NY  
Don Kerson, M.D., Brooklyn, NY  
Kavita Khajuria, M.D., Santa Monica, CA  
Ishrat Jahan Khan, M.D., Atlanta, GA  
Muhammad Najeeb Khan, M.D., Coon Rapids, MN  
Sarfraz Saeed Khan, M.D., Fishers, IN  
Shahbaz Amir Khan, M.D., Cupertino, CA  
Shaukat Ali Khan, M.D., Bethany, CT  
Elias Albert Khawam, M.D., Rocky River, OH  
Jan Eric Kiele, M.D., Anchorage, AK  
Moddy H Kiluvia, M.D., New York, NY  
Sunghye Kim, M.D., Brea, CA  
Van Lewis King Jr., M.D., San Antonio, TX  
Pankaj Kishore, M.D., Delmar, NY  
Carrie Spirodoula Kithianis, M.D., Charleston, SC  
Anna Klyachkina, M.D., Glenview, IL



Izchak Kohen, M.D., Roslyn Heights, NY  
Alan Kenji Koike, M.D., Sacramento, CA  
Andrea Martinez Kondracke, M.D., New York, NY  
Glenn Thomas Konopaske, M.D., Farmington, CT  
Robin Cook Kopelman, M.D., Iowa City, IA  
Tessy Moozhiyil Korah, M.D., Gainesville, FL  
Sergio Ricardo Martins Korndorfer, M.D., Boston, MA  
David Krassner, M.D., San Luis Obispo, CA  
Eduard Kraychik, M.D., Holland, PA  
Michael Joshua Kron, M.D., Oakland, CA  
John Frederick L'Ecuyer, M.D., Prairie Vlg, KS  
Raelene Rubillos Ladaga, M.D., Stony Point, NY  
Carmel Colgrove Lakhani, M.D., Eugene, OR  
Mohammad F. Danish Lateef, M.D., Durham, NC  
Giavanna Lau, M.D., Kailua, HI  
Michael Francis Lavarney, D.O., North Chelmsford, MA  
Janet Lynne Lawhon, D.O., Dallas, TX  
Charles C. Lee, M.D., Long Beach, CA  
Eden Santiago Lee, M.D., Las Vegas, NV  
Edward Te Sang Lee, M.D., San Francisco, CA  
Joseph Bonghyun Lee, M.D., Chestnut Hill, MA  
Paul Christopher Lee, M.D., Aiea, HI  
David Henry Lehman, M.D., La Jolla, CA  
Fredda Louise Leiter, M.D., Ventura, CA  
Raphael Jerome Leo, M.D., Lancaster, NY  
Richard Darren Levine, M.D., Maple Grove, MN  
Allan Lloyd Levy, M.D., Frederick, MD  
Liren Li, M.D., North Brunswick, NJ  
Dina Jeehyun Lim, D.O., La Jolla, CA

Alexander I. Lipin, M.D., Revere, MA  
Jennifer Y. Liu, M.D., San Francisco, CA  
Luciano Lizzi, M.D., J.D., Stockton, NJ  
Ronald Patrick Lobo, M.D., Wexford, PA  
Teresa Long, M.D., Fairway, KS  
Martha Stoner Losch, M.D., West Menlo Park, CA  
Elizabeth Catherine Loula, M.D., Brookline, MA  
Edward Willis Love Jr., M.D., High Point, NC  
Guido Ludergnani, M.D., Gulf Breeze, FL  
Stephen Douglas Lykins, M.D., Olympia, WA  
Alison Cornelia Lynch, M.D., Iowa City, IA  
Charles Chi-Chun Ma, M.D., Riverside, CA  
Demin Ma, M.D., North Easton, MA  
Naveen Maddineni, M.D., Sandy Spring, MD  
Jacqueline Ann Magno-Lagasca, M.D., Union City, CA  
Gerald Anthony Maguire, M.D., San Juan Capistrano, CA  
Mojgan Makki, M.D., Chicago, IL  
Laurie Malkoff, M.D., New York, NY  
Yolanda Annette Malone-Gilbert, M.D., Peachtree City, GA  
Jacob Manjooran, M.D., Henderson, NV  
Wendy Kay Marsh, M.D., Worcester, MA  
Christopher Drake Martin, M.D., Houston, TX  
Roger Jared Martineau, M.D., Cottonwood Heights, UT  
Gabrielle Rose Marzani-Nissen, M.D., Charlottesville, VA  
Maria Isabel Mas, M.D., Milwaukee, WI  
Anthony Joseph Mascola, M.D., Irvine, CA  
Sharon Diane Massau, M.D., Wadsworth, OH  
Scott Russell Masters, M.D., Kailua Kona, HI  
Brian Joseph Masterson, M.D., Centreville, VA

Jason Elia Mastor, M.D., Mooresville, NC  
Vanessa Regina Masullo, M.D., Washington, DC  
Michael Maze, M.D., Anchorage, AK  
Mariposa McCall, M.D., Berkeley, CA  
Robert Oliver McCarthy, M.D., Chicago, IL  
Kent Galen McDaniel, M.D., Richmond, VA  
Mark Fletcher McGee, M.D., Athens, OH  
Cynthia Gwen McNabb, M.D., Olympia, WA  
Michael Gerald Meade, M.D., San Francisco, CA  
Milada Vilorievna Medvedeva, M.D., Kansas City, MO  
Binali Mehta, M.D., Washington, DC  
Mark Melden, D.O., Coronado, CA  
Naomi Marta Mendelovicz, M.D., Waterford, CT  
Edwin Sugin Meresh, M.D., Chicago, IL  
Melissa Ann Messina, M.D., Kansas City, MO  
Inessa Y. Meyerovich, M.D., Hewlett, NY  
Alex D. Michelson, M.D., Irvine, CA  
Jill Bertine Midthune, M.D., Sykesville, MD  
Elizabeth Kelly Miller, M.D., Asheville, NC  
Barry Joseph Mills, M.D., Austin, TX  
Manizeh Mirza-Gruber, M.D., Houston, TX  
Mukesh Mittal, M.D., Salem, OR  
Raymond Klein Molden, M.D., Little Rock, AR  
Larry Lalji Momaya, M.D., Costa Mesa, CA  
Rodolfo A. Morales, M.D., Los Altos, CA  
Michelle Ruth Moran, M.D. P.C., Central, UT  
Varsha Morar, M.D., Potomac, MD  
Carol Bradley Morgan, M.D., Snellville, GA  
Shereen Alexandria Morse, M.D., Seattle, WA

Marina Moshkovich, M.D., Freehold, NJ  
Melinda Sue Motes, M.D., Denver, CO  
Jacqueline D. Mouzon, M.D., Clemson, SC  
Trenton Eliot Moyer, M.D., San Diego, CA  
Sharon Alspector Mozian, M.D., Lenox, MA  
Hayyah Beth Muller, M.D., Palo Alto, CA  
Siham Muntasser, M.D., Winston Salem, NC  
David Michael Murdock, M.D., Washington, DC  
Monir Moftakhari Musavi, M.D., Orono, ME  
Marija Dragica Mutabdzic, M.D., Oswego, NY  
Umadevi Naidoo, M.D., Newton, MA  
Sunil Kumar Nair, M.D., Largo, MD  
Mark Albert Napier, M.D., Edwardsville, IL  
Syed Akhtar Hasnain Naqvi, M.D., Laurel, MD  
Supriya Narang, M.D., Clarksville, MD  
Priyamvada Narayanan, M.D., Beverly Hills, CA  
Meredith Bea Nash, M.D., Port Washington, NY  
Suzy F. Nashed, M.D., Newark, DE  
Erika Maria Navarro, M.D., Dallas, TX  
Peter William Naylor, M.D., North Charleston, SC  
John Avanness Nazarian, M.D., West Hartford, CT  
Ahsan Nazeer, M.D., Portage, MI  
Brian Joseph Neukirch, M.D., Little Rock, AR  
John Fredric Neumaier, M.D., Ph.D., Shoreline, WA  
Joann Ng, M.D., Santa Barbara, CA  
Thuy-Huynh Trinh Nguyen, M.D., San Bernardino, CA  
Elena Carmen Nichita, M.D., Manlius, NY  
Melinda A Nieman, M.D., Hamilton, OH  
Shobha Nookala, M.D., Peoria, IL

Paul Edward Noroian, M.D., Westborough, MA

Bradley Jay Novak, M.D., Belmont, CA

Cecylia Nowakowska, M.D., Ph.D., Mountain View, CA

Jon Jason O'Pry, M.D., Aurora, CO

Jennifer DeLuca Oldham, M.D., Charlottesville, VA

Khari Abayomi Omolara, M.D., Natchez, MS

David George Ondich, M.D., Minneapolis, MN

Rafael David Ornstein, M.D., Watertown, MA

Faye Denise Owen, M.D., Redlands, CA

Manuel Nicolau Pacheco, M.D., Cambridge, MA

Wynn Wynn Paing, M.D., Elkins Park, PA

Chin Ho Pak, M.D., Weddington, NC

Jayanta K. Pal, M.D., Plainsboro, NJ

Igor Paris, M.D., Farmington Hills, MI

Alice Park, M.D., Sacramento, CA

Diane Marie Park, M.D., Gilbert, AZ

Louis A. Parrott Jr., M.D., Alpharetta, GA

Arti Parwani, M.D., Clarksville, MD

Niraja Tadikonda Patel, D.O., Scottsdale, AZ

Kunal Kumar Patra, M.D., North Sioux City, SD

Asha Jamila Patton-Smith, M.D., Arlington, VA

Samuel Ernest Payne III, M.D., Evans, GA

TaJuana Pearson, M.D., Johns Creek, GA

Roger Peele, M.D., Rockville, MD

Christine Marie Pelic, M.D., Mt Pleasant, SC

Edwin Hao Peng, M.D., Claremont, CA

Heath Robert Penland, M.D., Madison, AL

Michelle Pent, M.D., Albuquerque, NM

Michael John Peterson, M.D., Ph.D., Madison, WI

Lidija Petrovic-Dovat, M.D., Hummelstown, PA  
Fariba Khatabi Pfitzner, M.D., Scottsdale, AZ  
Robert Alan Philibert, M.D., Ph.D., Iowa City, IA  
Ateiat Zekry Philips, M.D., Greenville, NC  
Robert Ian Picker, M.D., Walnut Creek, CA  
Carmen Vincent Pinto, M.D., Elizabethtown, KY  
Katharine Minot Porter, M.D., Evanston, IL  
Daniel Patrick Potenza, M.D., Warner, NH  
Lee Brent Pravder, M.D., Miami, FL  
Michele K Preminger, M.D., Ho Ho Kus, NJ  
Daniel Grant Price, M.D., Cape Elizabeth, ME  
Nerissa Marge Price, M.D., Garner, NC  
Alexander Pushka, M.D., Plantation, FL  
Heather Ellen Queen-Williams, M.D., Copley, OH  
Gonzalo Fabio Quesada, M.D., Miami Beach, FL  
James Colin Rachal, M.D., Omaha, NE  
Carolyn Michelene Rader, M.D., Anchorage, AK  
Ann Elizabeth Radford, D.O., Suffolk, VA  
Jeffrey Thomas Rado, M.D., Chicago, IL  
Evaldas Radzevicius, M.D., Orland Park, IL  
Firoz Pushkin Rahman, M.D., Princeton Junction, NJ  
Umar Farooq Rahman, M.D., Fairfax Station, VA  
Amit Rajparia, M.D., New York, NY  
Sriram Ramaswamy, M.D., Omaha, NE  
Kirti Ramnivas, M.D., Schererville, IN  
Christopher Andrew Adler Ramsey, M.D., New York, NY  
Asim Khurshid Rana, M.D., exton, PA  
Pauravi Jayant Rana, M.D., Austin, TX  
Melinda Lenore Randall, M.D., Pittsfield, MA

Lori Elizabeth Raney, M.D., Dolores, CO

Damogipurapu Lakshmi Rao, M.D., Annandale, VA

Leon Ravin, M.D., Las Vegas, NV

Jody Mark Rawles, M.D., Long Beach, CA

Amit Razdan, M.D., Tampa, FL

Antonio Apostol Reantaso, M.D., Rancho Palos Verdes, CA

Sharon Gail Rechter, M.D., Munhall, PA

Padma Kanumuru Reddi, M.D., Appleton, WI

Pranahitha Thouti Reddy Reddy, M.D., Overland Park, KS

Sahaja Sri S. V. Reddy, M.D., Dublin, OH

Srikanth Madadi Reddy, M.D., Oakland, NJ

Munazza Najeeb Rehman, M.D., Horseheads, NY

Pamela Eve Reid, M.D., Cary, NC

Thomas Michael Reid, M.D., Sandy, UT

Eileen Clare Reilly, M.D., Roslindale, MA

James Louis Reuther, M.D., Portland, OR

Derek Keith Richardson, M.D., Lilburn, GA

Craig Garry Richman, M.D., Chalfont, PA

Jeanne Ann Rinehouse, M.D., Shavertown, PA

Cynthia D. Rivera, M.D., El Paso, TX

Syed Mehdi Rizvi, M.D., Wynnewood, PA

Aida Rjepaj, M.D., Hershey, PA

Donald Richard Robinson, M.D., Roseville, CA

Joshua Lawrence Roffman, M.D., Lexington, MA

Haleh Rokni, M.D., Cambridge, MA

Rebecca S Roma, M.D., Pittsburgh, PA

Fayez Romman, M.D., Wilton, CA

Charissa Rose, M.D., Clackamas, OR

Joshua Zev Rosenthal, M.D., Ellicott City, MD

Andrea Charmaine Ross, M.D., Dpo, AP  
Richard Roston, M.D., Berkeley, CA  
Sofya Markovna Rubinchik, M.D., Albuquerque, NM  
Alicia Renae Ruelaz Maher, M.D., Pacific Palisades, CA  
Jose D. Ruiz, M.D., Orlando, FL  
Robert Julian Ruxin, M.D., Sacramento, CA  
Moirra Ann Rynn, M.D., New York, NY  
Samia Sabeen, M.B.B.S., M.P.H., Yorktown, VA  
Usama Sabzwari, M.D., Frederick, MD  
Jyoti Sachdeva, MBBS, Montgomery, OH  
Marianne Saitz, D.O., M.P.H., Mobile, AL  
Humaira Fatima Saiyed, M.D., Oak Brook, IL  
Mary Toma Salama, M.D., Carmel, IN  
Candace Tom Saldarini, M.D., Morris Plains, NJ  
Rehan Saleem, M.D., Midlothian, VA  
John George Samanich, M.D., Pound Ridge, NY  
Salvador Ignacio Sanchez, M.D., Quincy, IL  
Harcharan Sandhu, M.D., Orland Park, IL  
Sarabjit Singh Sandhu, M.D., Newport Beach, CA  
Mukesh Sanghadia, M.D., San Diego, CA  
Orlando Santana, M.D., Hialeah Gardens, FL  
Christopher Gerald Santangelo, M.D., Alexandria, VA  
Patcho Nelson Santiago, M.D., Silver Spring, MD  
Christine Saroian, M.D., Carlsbad, CA  
Bogdan Paul Sasaran, M.D., Rochester, NY  
Michelle Ross Scargle, M.D., Palm Harbor, FL  
Jeffrey Stanton Schack, M.D., Spokane, WA  
Brendan Edward Scherer, M.D., El Granada, CA  
Marc John Scheublin, M.D., West Hartford, CT



Ingrid Schmedtje, D.O., Virginia Bch, VA  
Ira Lewis Scott Jr., M.D., Bangor, ME  
Nicholas Gerardo Scotto, M.D., Columbia, MD  
Mujeeb Uddin Shad, M.D., Portland, OR  
Amishi Yogesh Shah, M.D., Charlotte, NC  
Bela Sanjay Shah, M.D., Troy, MI  
Nimesh Bhupendra Shah, M.D., Statesville, NC  
Xiaoping Shao, M.D., Boyds, MD  
Amrita Sharma, M.D., Warren, NJ  
Andrew Blair Shaw, M.D., Blowing Rock, NC  
Marc Aaron Shay, M.D., Londonderry, NH  
Gabriela Shelley, M.D., New York, NY  
Afshin Shirani, M.D., Las Vegas, NV  
Stephanie Ching-Yi Sim, M.D., Sugar Land, TX  
Jamie Elizabeth Simmons, M.D., Yakima, WA  
Basant Kumar Singh, M.D., Newtown, PA  
Cedric Jabbar Skillon, M.D., Woodbury, MN  
Pamela B. Sklar, M.D., Ph.D., New York, NY  
David Marc Sloven, M.D., Chicago, IL  
Liliana Smurawska, M.D., Milton, MA  
Tasca Darlene Snow, M.D., Austin, TX  
Tanveer Sobhan, M.D., Delray Beach, FL  
Andrew Stuart Soloway, M.D., Philadelphia, PA  
Ayodeji Oladipo Somefun, M.D., Potomac, MD  
Marjorie Beth Somers, M.D., Gladwyne, PA  
Victoria Oyebolajoko Soyannwo, M.D., Tucson, AZ  
Janet Melinda Spraggins, M.D., Saratoga, CA  
Joyce Adams Spurgeon, M.D., Sellersburg, IN  
Karen Sue Stacher, M.D., Greenville, SC

Caroline Stamu-O'Brien, M.D., New York, NY  
Jennifer Lynne Stanley, M.D., Lansing, MI  
Lorna M. Stanley, M.D., Kendall Park, NJ  
Daniella Slavcheva Stavreva-Zlatareva, M.D., Southport, CT  
Steven Phillip Stout, M.D., Cape Elizabeth, ME  
Radosveta Ivanova Stoyanov, M.D., Alto, MI  
David Andrew Straker, D.O., Armonk, NY  
Thomas Scott Stroup, M.D., New York, NY  
Jenny Ching-Ya Su, M.D., New York, NY  
Sang Suh, M.D., Bellevue, WA  
Mumtaz Suleman, M.D., Seabrook, TX  
Eve Sisser Sullivan, M.D., Fresh Meadows, NY  
Jeffrey Chen-Ning Sung, M.D., Seattle, WA  
Julianne K. Suojanen, D.O., Ossining, NY  
Ramana Gundlapalli Surya, D.O., Katy, TX  
Abdul Hakeem Syed, M.D., Marietta, GA  
Saqib Abdul Syed, M.D., Sewell, NJ  
Laszlo Jozsef Szabo, M.D., Pleasant Hill, CA  
Jicheng Tang, M.D., Ph.D., Rye Brook, NY  
Ruqiya Tareen, M.D., Kalamazoo, MI  
Ross James Tatum, M.D., Fort Worth, TX  
Jasmine Pugh Taylor, M.D., Mableton, GA  
Benyam Gessesse Tegene, M.D., Mechanicsburg, PA  
Paul Thadeo Teman, M.D., Calgary, AB  
Radu H. Teodorescu, M.D., Milwaukie, OR  
Maureen C. Terrazano, M.D., Riverside, CA  
James D. Tew Jr., M.D., Pittsburgh, PA  
Paresh Kirtikumar Thanki, M.D., Valdosta, GA  
Stephen Mathew Theccanat, M.D., Long Branch, NJ

Yee Yee Thein, M.D., Carrollton, TX

Jyothi Philip Thomas, M.D., Syosset, NY

Anthony Jay Thornton, M.D., Roanoke, VA

Gloria Jing-Lon Tong, M.D., NORTH OAKS, MN

Alfredo Espiritu Torres, M.D., Monroe, LA

Paolo B. Travers, M.D., New York, NY

Theodore Robert Treese, M.D., Davie, FL

Tamella Jo Trulson, M.D., Richardson, TX

Shannon Alligood Tyler, M.D., Washington, NC

Jurgen Unutzer, M.D., Seattle, WA

Jan Peter Urkevic, M.D., Milton, MA

Jwalant Kumar Rameshchandra Vadalía, M.D., Manchester, NH

Kimberly Lee Valentine, M.D., Newark, DE

Jason Paul Veitengruber, M.D., Seattle, WA

Alice Lee Vestner, M.D., Barrington, RI

Oscar Manny Villaverde, M.D., Naples, FL

Mariles Viloría-Grageda, M.D., Baltimore, MD

Manjit Kaur Vohra, M.D., Brandon, FL

Janna Volkov, M.D., Washington, DC

Jeremy Alistair Walters, M.D., Lebanon, PA

Hai Wei Wang, M.D., Greensburg, PA

Kai-Ping Wang, M.D., Ridgewood, NJ

Margaret Stewart Ward, M.D., Woodridge, IL

M. Dhyanne Warner, M.D., Ph.D., Palo Alto, CA

Mustafa Kamal Warsi, M.D., Windsor, ON

Judith A Watkins, M.D., Eugene, OR

Rebecca Wendell Watters, M.D., San Francisco, CA

Barry Christopher Weed, M.D., Durham, NC

Ronald Shaw Wei, M.D., Cedar Grove, NJ

Elizabeth Frances Weinberg, M.D., Stockbridge, MA  
Howard Kenneth Weiner, M.D., Redding, CT  
Martin Howard Weinrauch, M.D., Fayetteville, NC  
Benjamin Leslie Weinstein, M.D., Sugar Land, TX  
Barbara Yates Weissman, M.D., San Mateo, CA  
Danielle Nadine Welch-Blair, M.D., Perryville, MD  
John Stuart Wermager, M.D., Apple Valley, MN  
James Curtis West Jr., M.D., Bethesda, MD  
Katharine Lopez Weymouth, M.D., Wilmington, DE  
Scott Byler Whittle, M.D., Salt Lake City, UT  
Julie Ann Wiese, M.D., Salt Lake City, UT  
Allison Letitia Bertness Williams, M.D., Minneapolis, MN  
Cheryl Denise Wills, M.D., Cleveland, OH  
Michael Stanley Wilson II, M.D., Cincinnati, OH  
Nancy Luechtefeld Wilson, M.D., Sioux Falls, SD  
Courtney Nemeth Wiseman, M.D., Lisle, IL  
Eve Joanna Wolinsky, M.D., Ph.D., Orono, ME  
Linda LeAnn Oren Woodall, M.D., Los Angeles, CA  
Bryan Eugene Woods, M.D., Portland, ME  
Laura Marjean Worrel, M.D., Midlothian, VA  
Robby Wayne Wyatt, M.D., Beavercreek, OH  
Jane Yumin Xie, M.D., Mill Creek, WA  
Leo Villar Yason, M.D., Spring Hill, FL  
Bryan Douglas Yates, M.D., Roseburg, OR  
Lilit Yegiazaryan, M.D., Burbank, CA  
Anjali D. Yeolekar-Dasari, M.D., Los Alamos, NM  
Srinivas Chandra Yerneni, M.D., Vero Beach, FL  
Ji Hyung Yoo, M.D., Vista, CA  
John Adam Young III, M.D., New Port Richey, FL

Nagy Adel Youssef, M.D., Evans, GA  
Samina M. Yousufi, M.D., Potomac, MD  
He Yuan, M.D., Burr Ridge, IL  
Liang Yuan, M.D., Newton, MA  
Tara Yuelor Yuan, M.D., San Clemente, CA  
Tammy S. Yuen, M.D., Northbrook, IL  
Shelly Yusuff, M.D., Lawrenceville, GA  
Uzma Zafar, M.D., Las Vegas, NV  
Aminadav Zakai, M.D., Mansfield, MA  
Henrik M. Zakari, M.D., New York, NY  
Yelena Zalkina, M.D., San Francisco, CA  
Naiyar Uz Zaman, M.D., Chino Hills, CA  
Zhi Jiar Zhuang, M.D., San Francisco, CA  
Piotr Aleksander Zieba, M.D., Danville, KY  
Tanya A. Zielinski, M.D., Grapevine, TX  
Paula Cristina Zimbrea, M.D., New Haven, CT  
Uros Zrnic, M.D., Coppell, TX

**Psychiatry Maintenance of Certification, October 31, 2016**

Robert McLain Adams IV, M.D., Wilmington, NC  
Archana Aggarwal, M.D., Columbia, MO  
Santosh Arjun Agnani, M.D., Kenmore, WA  
Muhammad Iqbal Ahmed, M.D., Baton Rouge, LA  
Aimee Ilene Ybanez Alinsonorin-Dioguardi, M.D., Lusby, MD  
Edward Clark Allen, M.D., Del Mar, CA  
Sharon Ann Allen, M.D., Pueblo, CO  
Isabel Allen-Steinfeld, M.D., Short Hills, NJ  
Menekse Alpay, M.D., Cambridge, MA  
Bahar Altaha, M.D., Morgantown, WV

Robert Russell Althoff, M.D., PhD, South Hero, VT

Anthony Wade Alvarez, M.D., Cincinnati, OH

Jean Marie Alves-Bradford, M.D., Ardsley, NY

Brent Ray Anderson, M.D., Washington, DC

Angel Stoyanov Angelov, M.D., Philadelphia, PA

John Richard Applegate, M.D., Philadelphia, PA

Jacqueline Suzanne Aregood, M.D., O Fallon, IL

Virgilio Bribiesca Arenas, M.D., River Forest, IL

Pamela Brougher Arenella, M.D., Albuquerque, NM

Adnan Arif, M.D., Palos Heights, IL

Natalie E. Armijo, M.D., Santa Fe, NM

Joseph Paul Arpaia, M.D., Eugene, OR

Jessica Anne Arsenault, M.D., Hampden, ME

Donald Joseph Aubrey, M.D., Scottsdale, AZ

Sahar Fathi Awad, M.D., Morganville, NJ

Olukayode Oladele Awosika, M.D., Eden Prairie, MN

Robert Charles Axelrod, M.D., Longview, WA

Margaret Bishop Baier, M.D., New Orleans, LA

Brigitte Yvette Bailey, M.D., San Antonio, TX

Brian Keith Bain, M.D., Colorado Springs, CO

Ellen Wilcox Ballerene, M.D., Dayton, OH

Donald August Balun, M.D., Springfield, MO

Rossano Luistro Bangasan, M.D., Bakersfield, CA

Michael David Banov, M.D., Marietta, GA

Eric Robert Barlow, M.D., Urbandale, IA

Debra Marie Barnett, M.D., Tampa, FL

Gwendolyn Barros, M.D., Cornish Flat, NH

Dana Paul Bartone, M.D., Georgetown, ME

Mudhasir Bashir, M.D., Charlottesville, VA

Artie Ann Bates, M.D., Blackey, KY  
Julia Ann Becker, M.D., Forest Hills, NY  
Douglas Winston Beech, M.D., Bexley, OH  
Claire Monica Belgrave, M.D., Chesapeake, OH  
Karen Elizabeth Beliles, M.D., Occoquan, VA  
Christina Marie Belmonte, D.O., Gurnee, IL  
Leigh Anne Bennett, M.D., Little Rock, AR  
Heather Marie Berg-Patel, M.D., Blaine, MN  
Joseph Michael Bertroche, D.O., Davenport, IA  
Mark Beuger, M.D., Pittsburgh, PA  
Tahir Iftikhar Bhatti, M.D., San Diego, CA  
Emad Mikhail Bishai, M.D., Spring, TX  
Monica Elane Bishop, M.D., Webster Groves, MO  
Sharen Marie Bridge Bisson, M.D., Towson, MD  
James Edward Black, M.D., Saint Paul, MN  
Daniel Barry Block, M.D., West Grove, PA  
Bradford David Bobrin, M.D., Cinnaminson, NJ  
David Mathew Bobrow, M.D., San Diego, CA  
Mary Elizabeth Bongiovi, M.D., PhD, Irvington, NY  
Shane Austin Boosey, M.D., Chapel Hill, NC  
Leora Lisa Borek, M.D., Wellesley, MA  
Jennifer Lynn Bowman, M.D., Louisville, KY  
Mary Shealy Boyd, M.D., West Columbia, SC  
Adam Marshall Brenner, M.D., Dallas, TX  
Edward Stuart Brodtkin, M.D., Philadelphia, PA  
Michael I. Brodsky, M.D., Los Angeles, CA  
Leslie Larissa Bronner, M.D., Durham, NC  
Marcia Ann Brontman, M.D., Chicago, IL  
Marguerite Meriwether Brown, M.D., Decatur, AL

Roger Timothy Brown, M.D., Mandeville, LA  
Eddy Severe Bruno, M.D., Lima, OH  
William Maxwell Burns, M.D., Pacifica, CA  
Steven Bryan Burton, M.D., Louisville, KY  
Consuelo Corazon Cagande-Maestrado, M.D., Voorhees, NJ  
William Stephen Cardasis, M.D., Livonia, MI  
Geraldyn Carducci, D.O., Manitowoc, WI  
Paul J. Carlson, M.D., Holladay, UT  
William N. Carroll, M.D., Fremont, OH  
Javier Ignacio Cartaya, M.D., Miami, FL  
Leah Slone Casuto, M.D., Montgomery, OH  
Robert Lee Caudill, M.D., Louisville, KY  
Melissa Monique Chappell, M.D., Chicago, IL  
Maxim Alexis Chasanov, M.D., Northbrook, IL  
Mahipal Singh Chaudhri, M.D., Rochester, NY  
Joseph Raymond Check, M.D., Trumbull, CT  
Eran Chemerinski, M.D., New York, NY  
Douglas Norman Chen, M.D., Reno, NV  
Hong Chen, M.D., Flemington, NJ  
Li-Shiun Chen, M.D., St. Louis, MO  
Yuejin Chen, M.D., Tucson, AZ  
Benjamin B. Cheney, M.D., New York, NY  
Henry Thomas Cheng, M.D., New York, NY  
Josepha A. Cheong, M.D., Nashville, TN  
Iryna A. Chepurnaya, M.D., Cooperstown, NY  
Irinel Ruxandra Chiriac, M.D., San Diego, CA  
Jayant Sakharam Choure, M.D., Rancho Cucamonga, CA  
Jonathan Karl Christianson, D.O., Chattanooga, TN  
Paramjit Chumber, M.D., Bridgeport, WV



Joy Arlene Clark, M.D., Hastings On Hudson, NY  
Nathaniel Kim Clark, M.D., Nashville, TN  
LaTricia Coffey, M.D., Las Vegas, NV  
Ronald Bruce Cohen, M.D., Great Neck, NY  
Pamela Yvonne Collins, M.D., DC, DC  
Paul Matthew Conti, M.D., Portland, OR  
Ian Ainsworth Cook, M.D., Los Angeles, CA  
Anthony Louis Coppola, M.D., Danville, CA  
Patricia Ann Costner, D.O., Tulsa, OK  
Anna Wilson Cothron, M.D., Rosholt, WI  
Daniel Seth Cowen, M.D., Hillsborough, NJ  
Halimena Montclair Creque, M.D., Winston Salem, NC  
Herbert Angel Cruz, M.D., Clovis, CA  
Jose Anibal Cruz Jr., M.D., Miami, FL  
Karen Kay Irene Cunningham, M.D., Jacksonville, FL  
Lucyna Z. Czarnota-Dolliver, M.D., Lakeville, MA  
Witold Pawel Czerwinski, M.D., Batesville, AR  
Magdoline Daas, M.D., Fishers, IN  
Irena Danczik, M.D., Fort Collins, CO  
Chan Dang-Vu, M.D., Vienna, VA  
Laura Christine Daniell, M.D., Phoenix, AZ  
Pablo De Amesti Davanzo, M.D., Monterey, CA  
Timothy Powell Davis, M.D., Medfield, MA  
Dean Michael De Crisce, M.D., Elizabeth, NJ  
Ludmila B. De Faria, M.D., Tallahassee, FL  
Paula Vanessa Backe De La Cruz, M.D., Menlo Park, CA  
Maryanne De Santis, M.D., Port Reading, NJ  
Jill DeBona, M.D., Nashville, TN  
Robert Edwin DeMartino, M.D., McLean, VA

Claudio Marcelo Demb, M.D., Chestnut Hill, MA  
Kimberly Dawn Dennis, M.D., Highland park, IL  
Jennifer Lynn Derenne, M.D., Mountain View, CA  
Kishore Krishna Desagani, M.D., Irvine, CA  
Melissa Stennett Deuter, M.D., San Antonio, TX  
Avtar Singh Dhillon, M.D., Williamsburg, VA  
Anne Elizabeth Diamond, M.D., New Milford, CT  
Leslie S. W. Dixon, M.D., Alfred, ME  
Dyanna Phillips Domilici, M.D., Lincoln, MA  
Nancy Jean Donovan, M.D., Boston, MA  
Daphne Dorc,, M.D., Wellington, FL  
Julie Rand Dorney, M.D., Atlanta, GA  
Joseph Gerald Dougherty, M.D., Silver Spring, MD  
Michael James Downing, M.D., Dallas, TX  
Emily Jane Doyle, M.D., Austin, TX  
Christopher Drew, M.D., Superior, CO  
Lawrence Herbert Dubester, M.D., Bethesda, MD  
Hinda Fink Dubin, M.D., Baltimore, MD  
Suzanne Elaine Ducate, M.D., Avon, CT  
Evan F. Duffy, M.D., Fountain Hills, AZ  
Harpreet Singh Duggal, M.D., Union City, CA  
Ruth Ann Dukoff, M.D., Anchorage, AK  
Sophie Francoise Michele Duriez, M.D., Beverly Hills, CA  
Debra Faye Duxbury, M.D., Ph.D., East Lansing, MI  
Richard Gregg Dwyer, M.D., Charleston, SC  
David Dybdal, M.D., Arlington, MA  
John Lee Eckard, M.D., Bloomington, IN  
Chukwuemeka K. Efobi, M.D., Armonk, NY  
Afsahneh T. Eframian, M.D., Maitland, FL

Matthew Kevin Egbert, M.D., Omaha, NE  
Mira Ann Eklund, M.D., Denver, CO  
Shashi K. Elangovan, M.D., Staten Island, NY  
Mohamed Yaser Elatrozy, M.D., Laguna Hills, CA  
Sameh Mounir Elsanadi, M.D., Irvine, CA  
Brandon Zakary Erdos, M.D., Newton, MA  
Sasha Elizabeth Ericksen, M.D., Fairbanks, AK  
Heidemarie Ernst, M.D., Menlo Park, CA  
Randall Timothy Espinoza, M.D., M.P.H., Los Angeles, CA  
John Andrew Faber, M.D., Costa Mesa, CA  
Babatunde Francis Fagbamiye, M.D., Warner Robins, GA  
Peter Alexander Fahnstock, M.D., Saint Petersburg, FL  
Mary Carolyn Fahrmeier, M.D., Higginsville, MO  
John H. Fanton, M.D., Amherst, MA  
Olatunde Ore Fatinikun, M.D., Perrysburg, OH  
Anne Catherine Fedyszen, M.D., Midlothian, VA  
Jennifer Marie Fellowes, M.D., New York, NY  
Jose Manuel Fernandez Jr., M.D., Bellaire, TX  
Lorency Fernando, M.D., Chantilly, VA  
Thomas Lewis Firnberg II, M.D., Breckenridge, CO  
Peter Morris Fischer, M.D., De Pere, WI  
Cynthia Jeona Folsome, M.D., Northridge, CA  
Martin Mischa Forsberg, M.D., Wynnewood, PA  
Sheila Marie Forsman-Bierman, M.D., Omaha, NE  
Manish Amrish Fozdar, M.D., Wake Forest, NC  
Lisa Ann Fraleigh, D.O., Logan, UT  
John Andrew Francis, D.O., Lees Summit, MO  
Margaret Elise Frank, M.D., Atlanta, GA  
Nancy Suzanne Fuller, M.D., Washington, DC

Jane Patricia Gagliardi, M.D., Raleigh, NC  
David W Galarneau, M.D., New Orleans, LA  
Gregory L. Gale, M.D., Phoenix, AZ  
Alina M. Galliano, M.D., Jacksonville Beach, FL  
Oscar Enrique Galvis, M.D., Wilmington, DE  
William Charles Gamberino, M.D., Ph.D., Ocala, FL  
Gaurav Gandotra, M.D., Pittsburgh, PA  
Julie Ann Garbutt, M.D., Gibsonia, PA  
Ronald Glenn Garbutt, M.D., Gibsonia, PA  
Susan Michelle Garriga, M.D., Jackson, LA  
Tesfa-Alem Gebremeskel, M.D., Wilmington, NC  
Igor Gefter, M.D., Wyckoff, NJ  
Russell Jan Geoffrey, M.D., Eugene, OR  
Romani Susan George, M.D., Plymouth Meeting, PA  
Andrew James Gerber, M.D., Ph.D., Stockbridge, MA  
Julie Jean Giglio, M.D., Tustin, CA  
Aradhana Gill, M.D., Centerville, OH  
Linda Mary Gill, M.D., Rochester, NY  
John Michael Gillmore, M.D., Fort Benton, MT  
Paulette Ginsburg, M.D., NY, NY  
James P. Given, M.D., Cary, NC  
Meena Gnanasekharan, M.D., Centerville, OH  
Katherine Lautzenhiser Godwin, M.D., Tulsa, OK  
Alexander Golin, M.D., Wyckoff, NJ  
Suman F Gona, M.D., San Francisco, CA  
Epichelle Gonzales-Chavez, M.D., Frisco, TX  
Alia Goodheart, M.D., Maynard, MA  
Alyson Goodwin, M.D., Atlanta, GA  
Darin Edward Gould, M.D., Kaneohe, HI

Maria Del Rosario Grau, M.D., Eden Prairie, MN

Cynthia Gwin Ellis Gray, M.D., Portland, OR

Kevin Franklin Gray, M.D., Dallas, TX

Rafael Gray, M.D., Lake Oswego, OR

Eli Greenberg, M.D., New York, NY

Lauren Ann Greene, M.D., Madison, WI

Corey Stuart Greenwald, M.D., Decatur, GA

Kellie Andes Griffith, M.D., Merritt Island, FL

Marcus Christopher Griffith, M.D., Duluth, GA

Katherine Schott Grimsley, M.D., Hesston, KS

Christopher Gross, M.D., Bellevue, WA

Angela Sarah Guarda, M.D., Baltimore, MD

Aruna Gullapalli, M.D., Monroe, LA

Luay Lutfi Haddad, M.D., Bloomfield hills, MI

Paul Francis Haley, M.D., Lee, MA

Jennie Formey Hall, M.D., Houston, TX

Jo Ann Hall, M.D., Washington, DC

Sherri M. Hansen, M.D., Madison, WI

Muhammad Abdur Rahim Haqqani, M.D., Frisco, TX

Warren Grant Harbison V, M.D., Boise, ID

Herbert Jay Harman, M.D., Corvallis, OR

Ashley Denise Harmon, M.D., Shoreline, WA

Charles Scott Harris, M.D., Renton, WA

Myleme Nyerere Ojinga Harrison, M.D., Raleigh, NC

Hamlet Raimundo Hassan, M.D., Tamarac, FL

John Michael Hawkins, M.D., Cincinnati, OH

Daniel M. Haycraft, M.D., Calistoga, CA

Francis Fitzgerald Hayden II, M.D., Bronx, NY

Mitchell Cary Haywood, D.O., Union, IL

Craig Richard Heacock, M.D., Fort Collins, CO

Kathleen Mary Heaney, M.D., Minneapolis, MN

William Alfred Hendrickse, M.D., Dallas, TX

Kevin Patrick Hill, M.D., Belmont, MA

Nini Hla, M.D., Rocklin, CA

Jacqueline A. Hobbs, M.D., Ph.D., Gainesville, FL

Karen Michele Hochman, M.D., M.P.H., Decatur, GA

Elizabeth Anne Hoge, M.D., Washington, DC

Anna Louise Holen, M.D., Seattle, WA

Debra Lynn Hollander, M.D., W Bloomfield, MI

Matthew Elton Holmes, M.D., Waynesville, NC

Andrzej Honory, M.D., Tucson, AZ

Kashfia Duza Hossain, M.D., Belton, SC

James Belden Houser, M.D., Redmond, WA

Shushan Hovanesian, M.D., Miller Place, NY

David Huang, M.D., Egg Harbor Township, NJ

Cheryl Edith Huber, M.D., Bismarck, ND

Siming Chen Hummer, M.D., Indianapolis, IN

Estelle Cline Hung, M.D., Greensboro, NC

Richard Fredrick Huspen, D.O., Kingston, OH

Afia Akhtar Hussain, M.D., Fairfax, VA

Long Phuoc Huynh, D.O., LOS ALAMITOS, CA

Dean Akira Inouye, M.D., Alexandria, VA

Alexander Shalom Isaac, M.D., Annandale, DC

Cuneyt Iscan, M.D., Westborough, MA

Kevork Iskenderian, M.D., Pasadena, CA

Sirajuddin Ismail, M.D., Mount Laurel, NJ

Michael Brian Jackson, M.D., Hoboken, NJ

Susan Jaffe, M.D., New York, NY

Daryoush Jamal, M.D., Burbank, CA  
Susan Florence Janes, D.O., Tinton Falls, NJ  
Mohammad Ihtesham Janjua, M.D., Collegeville, PA  
Daniel Craig Jay, M.D., Atlanta, GA  
Mark Howard Jensen, D.O., Lincolnville, ME  
Anthony Gerard Johnson, M.D., New Orleans, LA  
Bradley Ray Johnson, M.D., Tucson, AZ  
Janet Elaine Johnson, M.D., New Orleans, LA  
Sonya Nicole Jones, M.D., Collierville, TN  
Benjamin William Jordan, M.D., Athens, OH  
Ross David Judice, M.D., Bend, OR  
Joel Cordero Julian, M.D., Portland, OR  
Tony Juneja, M.D., Lakewood, NJ  
David Ira Kabel, D.O., Plano, TX  
Charles Edward Kahn, M.D., Pittsburgh, PA  
Richard C. Kaiser, M.D., Bedford, MA  
Phacharawut Kanchananakhin, M.D., Granite bay, CA  
Arif Karim, D.O., Santa Monica, CA  
Abigail Kay, M.D., Philadelphia, PA  
Richard Alan Kaye, D.O., Suffolk, VA  
Jeri Joan Kedzierski, M.D., Plymouth, MI  
Lawrence Steven Kegeles, M.D., New York, NY  
Isidore Michael Keiman, M.D., Bloomfield, NJ  
Brian Alan Keyes, M.D., Woodbridge, CT  
Fazal M. Khan, M.D., Evans, GA  
Sumera Tariq Khan, M.D., Cincinnati, OH  
Najma Khanani, M.D., Allentown, PA  
Mahendra Pal Singh Khera, M.D., Sykesville, MD  
Sasha Farshid Khosravi, D.O., Grimes, IA

Atul Khullar, M.D., Edmonton, AB  
Calvin Dean Kilcrease, M.D., Coarsegold, CA  
Michelle Renee King, M.D., Stockton, CA  
Suzanne Marie King, M.D., Columbia, MO  
Erik Lee Kinzie, M.D., New Orleans, LA  
Donald Rollin Klasing, M.D., Cramerton, NC  
Alexandra Sofia Klufas, M.D., Englewood Cliffs, NJ  
James Michael Koban, M.D., Portage, PA  
Linda Kornitzer Kollross, M.D., Eau Claire, WI  
Mahija Kottapalli, M.D., Scott Depot, WV  
Ildiko Katalin Kovacs, M.D., La Jolla, CA  
David Sert Krakow, M.D., New York, NY  
David Roy Kramer, M.D., Miami Beach, FL  
Katarzyna Agnieszka Krawczyk, M.D., Napa, CA  
Rajesh Kumar, M.D., Mequon, WI  
Sunita Kumar, M.D., Beachwood, OH  
Leonard Ariel Lado, M.D., Bonita Springs, FL  
Monique Bertha LaFrance, D.O., Tecumseh, KS  
Alan Hsing Yueh Lai, M.D., San Francisco, CA  
Jeouhsing Lai, M.D., Gardena, CA  
Lisa Ann Lambert, M.D., Canaan, NH  
Mary Beth Lardizabal, D.O., Minneapolis, MN  
Michael Theodore Lardon, M.D., San Diego, CA  
Vassilios Latoussakis, M.D., New York, NY  
John Edward Latz Jr., M.D., M.S., Catawba, NC  
Scott Richard Lauze, M.D., San Francisco, CA  
Susan Lee, M.D., New York, NY  
Gayani Leonard, M.D., Trinity, FL  
Eric Nathaniel Leong, D.O., Corvallis, OR



Jennifer Leong, M.D., Philadelphia, PA  
Maria Dolores M. Leonido-Yee, M.D., Beverly Hills, CA  
Henry Lepely, M.D., Jacksonville, FL  
Elizabeth Ruth LeQuesne, M.D., New York, NY  
Sara Jo Lerner, M.D., Olympia, WA  
Barbra Renee Lesh, M.D., Orchard Park, NY  
Nigel Christopher Lester, M.D., Saint Louis, MO  
Eric Mark Levander, M.D., MPH, Los Angeles, CA  
Tim Christopher Levenhagen, M.D., Oconomowoc, WI  
Andrea Hillary Levy, M.D., Madison, WI  
Shana Rene Levy, M.D., San Francisco, CA  
Eric Conrad Li, M.D., Los Angeles, CA  
Eric Lifshitz, M.D., Los Angeles, CA  
Denise Lin, M.D., Albuquerque, NM  
Paul Ruhr Linde, M.D., San Francisco, CA  
Steven Evans Lindley, M.D., Ph.D., Mountain View, CA  
Sarah Hollingsworth Lisanby, M.D., Durham, NC  
Peter John Litwin, M.D., Neptune, NJ  
Jennifer Liu, M.D., Montvale, NJ  
Allison Lomonaco, M.D., New York, NY  
Peter L. Longstreet, M.D., Kentwood, MI  
Sajid Lopez, M.D., Miami, FL  
Melissa Patricia Lopez-Larson, M.D., Park City, UT  
Manuel Lopez-Leon, M.D., Forest Hills, NY  
Cathy Jo Lore, M.D., Huntington, NY  
Francis Everett Lotrich, M.D., Ph.D., Pittsburgh, PA  
Brett Yuan-Hsiang Lu, M.D., Ph.D., Honolulu, HI  
Kenneth N. Luke, M.D., Honolulu, HI  
Gregory Cicero Lunceford, M.D., Atlanta, GA

Kathleen McNamara Lundvall, M.D., Lexington, SC  
Charles William Luther, M.D., Middleburg Heights, OH  
Tracie E. Luther, M.D., Cleveland, OH  
Teresa Lynn Lutka, M.D., West Mifflin, PA  
Jennifer M. Lytle, M.D. MPH, Denver, CO  
Duncan Clark MacCourt, J.D., M.D., Woburn, MA  
John Francis Mackey III, M.D., Santa Rosa, CA  
Alice Cook Madison, M.D., Golden, CO  
Ahsan Mahmood, MBBS, Terre Haute, IN  
Kevin Majeres, M.D., Cambridge, MA  
Glenna E. Major, M.D., Louisville, KY  
Hyder Habib Makki, D.O., Dearborn Heights, MI  
Madhu Bala Malhotra, M.D., Garden City, NY  
Venkateswara Rao Malineni, M.D., Roslyn Heights, NY  
Nasreen Azhar Mallik, M.D., Nashville, TN  
Robert Maman, M.D., Potomac, MD  
Shmuel Mandelbaum, M.D., Mequon, WI  
Gail Helen Manos, M.D., Chesapeake, VA  
Maher Monir Mansour, M.D., Fairlawn, OH  
Sara Lang Marcino, M.D., Daniel Island, SC  
David Michael Margulies, M.D., Stony Brook, NY  
John J Mariani, M.D., New York, NY  
Marianne Marsh, M.D., Chesterfield, NH  
Erika N. Marshall, M.D., Roslyn, NY  
Christopher Gerard Martin, M.D., Amherst, NY  
Joseph Paul Martin, D.O., San Antonio, TX  
Ola Jenelle Martin, M.D., Lilburn, GA  
Melissa Martinez, M.D., San Antonio, TX  
Shahm Martini, M.D., Seattle, WA

Joshua Jeffrey Mason, M.D., Flushing, NY  
Abdul Mateen, M.D., Chesapeake, VA  
Daphne Dawn Maurer, M.D., Champaign, IL  
James Stephen Maurer, M.D., Yucaipa, CA  
Ruta Ulhas Mayekar, M.D., Chadds Ford, PA  
Ramona M. Mazzeo, M.D., Apalachin, NY  
Robin Dale McAllister, M.D., Golden Valley, MN  
Leah Marie McCartt, M.D., LEXINGTON, SC  
Jerlyn Cummings McCleod, M.D., Dothan, AL  
Kara Lynn McCunn, M.D., Niagara Falls, NY  
Robert McFadden, M.D., Cherry Hill, NJ  
Ann Elizabeth McIntosh, M.D., Los Angeles, CA  
Jennifer Dora McKay, M.D., Reno, NV  
Nora Kathleen McNamara, M.D., Fairview Park, OH  
Stephen Jacobs McNamara, M.D., Charlottesville, VA  
Thomas Watson Meeks, M.D., San Diego, CA  
Yasmeen Khaliq Memon, M.D., Long Branch, NJ  
Mariana Mendez-Tadel, M.D., Philadelphia, PA  
Anne Mary Merra, M.D., York, ME  
Cecilia Mary Mikalac, M.D., Worcester, MA  
Leslie Rachel Miller, M.D., Baltimore, MD  
Nada Milosavljevic, M.D., Andover, MA  
Ellen Minerva, M.D., Canterbury, NH  
Carol Emiko Minn, M.D., Honolulu, HI  
Elizabeth Mirabello, M.D., Putnam Valley, NY  
Liliana Zoe Miranda, M.D., Guaynabo, PR  
Theresa Marie Miskimen, M.D., Millstone Twp, NJ  
Leslie Ann Montana, M.D., Carrboro, NC  
Christopher Morache, M.D., San Diego, CA

Mary Donovan Moreno, M.D., Laramie, WY  
Mark Thomas Morrissey, M.D., San Francisco, CA  
Mehran Motamed, M.D., Menifee, CA  
Nidal Jihad Moukaddam, M.D., Houston, TX  
Terrye Mowatt, M.D., Columbia, MD  
Ayesha Muquim, M.D., Karachi, n/a  
Chad Lewis Murdock, M.D., West Lafayette, IN  
Michael D. Murphy, M.D. M.P.H., Beverly, MA  
Michael Edward Murray, D.O., Ph.D., Asheville, NC  
Syed Jawaid Murtaza, M.D., Haymarket, VA  
Fathima Farhana Musthaq, M.D., Plymouth Meeting, PA  
Abdul Nadeem, M.D., Bradenton, FL  
Sumera Nadeem, M.D., Oakton, VA  
David Bruce Nagler, M.D., Brunswick, ME  
Alyson Kiyoko Nakamura, M.D., Dallas, TX  
Kristie Marie Nardell, M.D., West Wyoming, PA  
Robert Carlo Nardone, M.D., Natick, MA  
Gregory Harold Narron, M.D., Asheville, NC  
Shobhit Singh Negi, M.D., Clarksville, MD  
Marc Patrick Nespoli, M.D., Southbury, CT  
Stewart Swagler Newman, M.D., Hillsboro, OR  
Peter E. Newsom, M.D., Woodside, CA  
Mai Phuong Nguyen, M.D., Houston, TX  
Ngoc Tram Nguyen, M.D., Bronxville, NY  
Monica Cecile Nichols, M.D., Winchester, CA  
Julie K Nielsen-Witkovsky, M.D., Middleton, WI  
Nikhil D. Nihalani, M.D., M.B.B.S., Jacksonville, FL  
Ilia Nikhinson, M.D., Huntingdon Valley, PA  
George John Nikopoulos, M.D., Shenandoah, TX

Chloe Nims, M.D., New York, NY  
Brock P. Nolan, M.D., Indianapolis, IN  
Benjamin R Nordstrom, M.D., Brooklyn, NY  
Gabriela O'Connell, M.D., Raleigh, NC  
Paul David O'Keefe, D.O., Brooklyn, NY  
Dennis Michael O'Neil, M.D., Swampscott, MA  
Sarah Elizabeth Quimby O'Neil, M.D., Auburndale, MA  
Benjamin Wayne OBrien, M.D., Kapolei, HI  
Amira Shmoueil Odisho, M.D., Shreveport, LA  
Elizabeth Ebeghianye Ohiku, M.D., Decatur, GA  
Daniel Chinedu Okoro, M.D., Okotoks, AB  
Chika Okpalanma, M.D., Bronx, NY  
Titus Babawale Okunlola, M.D., East Meadow, NY  
Julie Hart Oldroyd, M.D., Napa, CA  
Celia Mercado Ona, M.D., Honolulu, HI  
Robert John Ornelas, M.D., Lexington, SC  
Teresa Ann Oropilla-Kiefer, M.D., Versailles, KY  
Latifat Oluwatoyin Osinowo, M.D., Maumee, OH  
David Wayne Oslin, M.D., Philadelphia, PA  
Raymond Ownby, M.D., Ph.D., Ft Lauderdale, FL  
Jongsok Pak, M.D., Minnetonka, MN  
Milarose Hernandez Panaligan, M.D., Rochester, NY  
Sandhya Panguluri, M.D., Cerritos, CA  
Roberto Zorilla Paranal, M.D., Manalapan, NJ  
Carrie Parente, M.D., Wayzata, MN  
Priya Sanjana Parmar, M.D., Calabasas, CA  
Daren Darius Parsa, M.D., Destrehan, LA  
Jennifer Elizabeth Pate, M.D., Houston, TX  
Tushar Patel, M.D., El Paso, TX

Jagannath J. Patil, M.D., Edwardsville, IL  
Naina Jamnadas Patil, M.D., Overland Park, KS  
David Louis Paulson, M.D., Orem, UT  
Dale Aaron Peeples, M.D., Augusta, GA  
Donna Marie Pellerin, M.D., Brookfield, CT  
Leah Dorothea Perez, M.D., Dunlap, IL  
Victor Javier Perez Preciado, M.D., San Luis Obispo, CA  
Timothy Scott Peters-Strickland, M.D., Upper Black Eddy, PA  
Constance Philipps, M.D., Crown Point, IN  
Yolonda Renee Pickett, M.D., Scotch Plains, NJ  
Jennifer H.W. Pien-Wong, M.D., Menlo Park, CA  
Desiderio Pina, M.D., M.P.H., Beavercreek, OH  
Stephen Louis Pinals, M.D., Ann Arbor, MI  
Gordon Plotkin, M.D., Ph.D., Beverly Hills, CA  
Edwig Karol Plotnick, M.D., Silver Spring, MD  
Ronnie Allen Pollard, M.D., Plano, TX  
Ernest Poortinga, M.D., Ann Arbor, MI  
Rebecca Ann Powers, M.D., Campbell, CA  
Catalin Pralea, M.D., Old Saybrook, CT  
Melinda Hill Privette, M.D., Morganton, NC  
Jose Pugliese, M.D., Dix Hills, NY  
Rebeca Leticia Quezada, M.D., Fairfax, CA  
Veronica Quezada, M.D., San Luis Obispo, CA  
Desiree Ann Rahman, M.D., Naperville, IL  
M. Sadiqur Rahman, M.D., Williamsville, NY  
Michael Dean Raida, M.D., Oak Park, IL  
Anita Sumathi Ramanathan, M.D., Oakland, CA  
Lina Yogendra Rana, M.D., Piscataway, NJ  
Rakesh Ranjan, M.D., Brecksville, OH

Ashok Rao, M.D., Modesto, CA  
Teresa Crisostomo Raras, M.D., Ripon, CA  
Ann Louise Rathe, M.D., Waverly, IA  
Daleep Karan Rathore, M.D., Jeannette, PA  
Perveen Rathore, M.D., Westborough, MA  
Katherine L Ray, M.D., Yarmouth, ME  
Ahmad Raza, M.D., Dallas, TX  
Scott David Rebhun, M.D., East Thetford, VT  
James Mathew Recht, M.D., Cambridge, MA  
Bhagyalakshmi Reddy, M.D., Hamden, CT  
Jithender Pati Reddy, M.D., NEWNAN, GA  
Nicole Debra Regent, M.D., New York, NY  
Tina L. Reiter, D.O., Murrysville, PA  
Patrice Lanette Reives-Bright, M.D., Merrick, NY  
Richard Stanley Rhoads, M.D., Tucson, AZ  
Jawad Riaz, M.D., McKinney, TX  
Gary L. Rich, M.D., Grand Rapids, MI  
Justin Richardson, M.D., New York, NY  
Paul Timothy Richardson, M.D., Woodbury, MN  
Edward Philip Rivera, M.D., Peoria, AZ  
Najmun Riyaz, M.D., mount laurel, NJ  
Sofia Rizwan, M.D., Springfield, VA  
Ruthann P. Rizzi, M.D., Worcester, MA  
Michelle Chuen Roberts, M.D., Rockville, MD  
Corvin Vernon Robinson, M.D., Ijamsville, MD  
Danielle Renee Robinson, M.D., Silver Spring, MD  
Todd A. Rochman, M.D., Pleasant Vly, NY  
Raul Rodriguez, M.D., Hartwell, GA  
Isabel M. Rodriguez-Anziani, M.D., San Juan, PR

Michael Rogachevsky, M.D., Long Beach, CA

Hollister Blaine Rogers, M.D., Durham, NC

Pamela Patricia Rollings-Mazza, M.D., Mechanicsburg, PA

Sharon Romm, M.D., Seattle, WA

Andrew Dror Rosenbach, M.D., Tel Aviv, n/a

Jennifer Tucker Rosenberg, M.D., Beachwood, OH

Betsy June Rosiek, M.D., Noblesville, IN

Lawrence N. Rossi, M.D., Auburn, AL

Robert Jeffrey Rothenstein, M.D., New York, NY

Orlando Lazaro Ruano, D.O., Apollo Beach, FL

Bruce Edward Rubenstein, M.D., New York, NY

David Harris Rubin, M.D., Boston, MA

Katherine Grace Ruiz-Mellott, M.D., Boston, MA

Theodore Jay Ruza, D.O., Farmington Hills, MI

James Giacomo Saccomando Jr., M.D., Boise, ID

Muhammad Saeed, M.D., Tucson, AZ

Matthew Steven Sager, M.D., Madison, WI

Zita Susan Samuel, M.D., Austin, TX

Roxann Maria Sangiacomo, M.D., Fort Myers, FL

Giorgio Sant'Ambrogio, M.D., Boerne, TX

Jennifer Mattucci Santoro, M.D., Fairfax, VA

Daniel Maynard Savin, M.D., Denver, CO

Raluca Ioana Savu, M.D., Quincy, MA

Jeffrey Bernhard Sawyer, M.D., St. Louis Park, MN

Russell Edward Scheffer, M.D., Wichita, KS

Nicholas Jacob Schor, M.D., Olney, MD

Matthew Alan Schreiber, M.D., Ph.D., Seattle, WA

Naalla Danielle Schreiber, M.D., Bergenfield, NJ

Jennifer Lynn Schroederus, M.D., Milwaukee, WI



Mary Lucile Schuler, M.D., Rossville, KS  
Jennifer Alison Scott, M.D., Hillsboro, OR  
Lisa Megan Seufert, M.D., Philadelphia, PA  
Rizwana Shaheen, M.D., Bakersfield, CA  
Benjamin M Shapiro, M.D., Los Angeles, CA  
Ashish Sharma, M.D., Omaha, NE  
Madhulika Brahm Sharma, M.D., East Windsor, NJ  
Elias Karim Shaya, M.D., Lutherville, MD  
Leo Sher, M.D., Fort Lee, NJ  
Robert Lee Sherron, M.D., Washington, DC  
Aneil M. Shirke, M.D., Ph.D., New York, NY  
Geetha Shivakumar, M.D., Southlake, TX  
Karla Ramsey Shore, M.D., Atlanta, GA  
Aditi Mohan Shrikhande, M.D., Chevy Chase, MD  
Robert B. Shulman, M.D., Skokie, IL  
Mustaq Ahmed Siddique, M.D., Bedford, NY  
Lori Allison Sidman, M.D., New York, NY  
Steven Todd Silver, M.D., Saint Paul, MN  
Erin Jennifer Silvertooth, M.D., West Lake Hills, TX  
Sultan Jabari Simms, M.D., Atlanta, GA  
Asher Brian Simon, M.D., New York, NY  
Amitabh Singh, M.D., Las Vegas, NV  
Bobby Singh, M.D., San Francisco, CA  
Meeta Singh, M.D., Franklin, MI  
Thomas Robert Sixbey, M.D., Millersville, MD  
Andrew O'Connor Skinner, M.D., Fishers, IN  
Jennifer Crawley Sloan, M.D., Indianapolis, IN  
Jeremy Douglas Smith, M.D., Rochester, NY  
Milena Hruby Smith, M.D., Ph.D., Annapolis, MD

Nancy Jeanne Smith, D.O., Dayton, OH  
Susan Jennifer Smith, M.D., Menlo Park, CA  
Jayanthi R. Smucker, M.D., Granger, IN  
Mark Snowden, M.D., Seattle, WA  
Sherry Ann Soefje, M.D., La Jolla, CA  
Joseph Otto Sokal, M.D., San Marcos, TX  
Catherine Borja Soriano, M.D., Chapel Hill, NC  
Stephen Kenneth Sponagle, M.D., delafield, WI  
Vinod Hiremagalur Srihari, M.D., New Haven, CT  
Ronald Garvin St Hill, M.D., Quincy, IL  
Guitelle St. Victor, M.D., Westbury, NY  
Susanne Inez Steinberg, M.D., Philadelphia, PA, PA  
Scott Michael Stevens, M.D., Chico, CA  
Daniel Giovanni Stewart, M.D., Ridgewood, NJ  
Michael Starbin Stewart, M.D., Mendham, NJ  
Anne Henry Stoe, M.D., Fargo, ND  
Michael Murphy Stone, M.D., Galveston, TX  
Beverly Jean Stoute, M.D., Brookhaven, GA  
Maya Patrice Strange, M.D., Essex, VT  
Joshua Laurence Straus, M.D., Evanston, IL  
Girish Shekar Subramanyan, M.D., San Rafael, CA  
Derek Hudson Suite, M.D., Mount Vernon, NY  
Mandayam C. Sujata, M.D., Allison Park, PA  
Leena Magdalene Sumitra, M.D., Mountain House, CA  
Mahender Reddy Surakanti, M.D., Fort Wayne, IN  
Irina Surbnshanyan, M.D., Garnerville, NY  
Maria Ruiz Sweeney, M.D., San Antonio, TX  
Latonia Rice Sweet, M.D., Winchester, KY  
Ahsan Syed, M.D., Columbia, MO

Fareed Tabatabai, M.D., Rochester, IL  
Pedro Franco Tactacan, M.D., East Greenwich, RI  
Kavitha Rao Tadikonda, M.D., Los Alamitos, CA  
Ala Eldin Abdel Hamid Taha, M.D., Kaneohe, HI  
Liana Niculina Tanase, M.D., Patton, CA  
Miriam C. Tepper, M.D., Somerville, MA  
Melanie Lynn Tew, M.D., Raleigh, NC  
Timothy Lawrence Thistlethwaite, M.D., Charleston, WV  
Linda Louise Thomas, M.D., Savannah, GA  
Ruby Thomas, M.D., Fredericksburg, VA  
Elaine Tierney, M.D., Baltimore, MD  
Judith Elaine Tolhurst, M.D., Newberry, SC  
Victoria Charlotte Trickett, M.D., San Antonio, TX  
Amy Jacqueline Trivette, M.D., Crestwood, KY  
Annmarie Tromba, D.O., Massapequa Park, NY  
Dung Hoang Truong, M.D., Minneapolis, MN  
Lorraine C. Tsui, M.D., Hot Springs, AR  
Kalsoom Tufail, M.D., Cerritos, CA  
Barbara D. Twardowski, M.D., Glenview, IL  
Alena B Tyre-Littlejohn, M.D., New Albany, MS  
Shannon Christine Tyson-Poletti, M.D., Lakewood, CO  
Evan George Tzakis, M.D., Riverside, CA  
Ndukwe Kalu Uduma, M.D., Tyler, TX  
Savitha R Upadhya, M.D., Morrisville, NC  
Catherine Mary Ushchak, M.D., Saratoga Spgs, NY  
Mahaveer C. Vakharia, M.D., Kennesaw, GA  
Gilbert Valdes, M.D., Mahopac, NY  
Ignacio Herman Valdes, M.D., M.S., Houston, TX  
Thomas John Valente, M.D., Mount Dora, FL

Kristine L. Vallrugo, M.D., Sarasota, FL  
Rodolfo Jose Valverde Haeussler, M.D., Anderson, SC  
James Christopher Van Doren, M.D., Minnetonka, MN  
Kelly Ellen Vance, M.D., Richmond, KY  
Wendy Liana Vandemark, M.D., Sparks, GA  
Gyorgy Laszlo Varai, M.D., Framingham, MA  
James Ronald Varrell, M.D., Marlton, NJ  
Roma Ashok Vasa, M.D., Cockeysville, MD  
Chantee Denise Vavasseur, M.D., Houston, TX  
Jeremy Michael Veenstra-VanderWeele, M.D., New York, NY  
Vijaya Veena Vellanki, M.D., Honolulu, HI  
Enrique C. Villacres, M.D., Renton, WA  
Jose Licuanan Villaluz, M.D., New York, NY  
Arturo Lo Villamor, M.D., Davis, CA  
Alicia Beatriz Vittone, M.D., Houston, TX  
C. J. Voigt, M.D., Ann Arbor, MI  
Rinata Kaganskaya Wagle-McClelland, M.D., Danville, CA  
Milton Leonard Wainberg, M.D., New York, NY  
William Baskin Walkup Jr., M.D., Columbia, SC  
Ruth Evelyn Walton, M.D., Portsmouth, VA  
Garrett Lee Watanabe, M.D., San Jose, CA  
Libby Ann Weeks, M.D., Brentwood, TN  
Pamela Alice Weinberg, M.D., New York, NY  
Tal Weinberger, M.D., Bala Cynwyd, PA  
Edward Neil Weissberg, M.D., Maale Adumim, n/a  
Bruce Charles Welch, M.D., Saint Petersburg, FL  
Thomas Patrick Welch, M.D., Portland, OR  
Randon Scott Welton, M.D., Beavercreek, OH  
Laura Ruth West, M.D., Montclair, CA

Jeffrey Grant Weyeneth, M.D., Davenport, IA  
Marsha Kaye Wheatley, M.D., Houston, TX  
Coleman H. Wheeler, M.D., Leawood, KS  
Christopher Luke White, M.D., Memphis, TN  
Mia Robinson White, M.D., College Park, GA  
Christopher Brian Wiegand, M.D., Tucson, AZ  
Eliza Nyla Wilfred, M.D., Elkins Park, PA  
Arshad Victor William, M.D., Broomfield, CO  
Caroline Borden Williams, M.D., New York, NY  
Solomon Seffia Williams, M.D., Georgetown, TX  
Diana Williams Wilson, M.D., New Orleans, LA  
Christine Ellen Wittmann, M.D., Cambridge, MA  
Daniel Wolf, M.D.,Ph.D., Wynnewood, PA  
Joanna Wolicki-Shannon, M.D., Kinston, NC  
Patrick Wong, M.D., Sacramento, CA  
John Moon Woo, M.D., Jacksonville, FL  
Jennifer Pitra Wootten, M.D., Atlanta, GA  
Tara Michele Wright, M.D., Charleston, SC  
Gary H. Wynn, M.D., Arlington, VA  
Farhad Khorrami Yaghoubi, M.D., Los Angeles, CA  
Scott M. Yarosh, M.D., Saint Paul, MN  
Sarah Yasmin, M.D., Palo Alto, CA  
Doris Ann Ybarra-Salinas, M.D., Butner, NC  
Hla Hla Yee, M.D., Arcadia, CA  
Alan Soon Song Yeo, M.D., Beaverton, OR  
Helen Huafang Yi, M.D., Cherry Hill, NJ  
Suzanne Russ Yoder, M.D., Jacksonville, FL  
Moon-Hee Yoo, M.D., Farmington, CT  
Hani Shaker Zaki, M.D., Philadelphia, PA

Paul Anthony Zarkowski, M.D., Seattle, WA

Richard Anthony Zarriello, M.D., Redding, CA

Laishang Peter Zhang, M.D., Clayton, MO

Wei Zhang, M.D., Durham, NC

Joshua Orr Zimmerman, M.D., Minneapolis, MN

John Peter Zincone, M.D., Altamonte Springs, FL

Gwen Lois Zornberg, M.D., New York, NY

John Frederick Zwerneman, M.D., Granger, IN

Lidia Zylowska, M.D., Golden Valley, MN

**PsychMed Maintenance of Certification, July 1, 2016**

John Alexander Baker, M.D., Lansing, MI

Juan Raul Condemarin, M.D., Brighton, MA

Maryanne De Santis, M.D., Port Reading, NJ

Jerry B. Finkel, M.D., New York, NY

Perry Anthony Z. Maliuanag, M.D., Los Altos Hills, CA

Earl John Delacruz Mauricio, M.D., Washington, DC

**PsychMed Maintenance of Certification, April 18, 2016**

Susan Elizabeth Abbey, M.D., Toronto, ON

Maria-Victoria Agarin, M.D., Mineola, NY

William Thomas Beecroft, M.D., Mason, MI

Andrea Lenore Caldwell, M.D., San Pedro, CA

Lisa Marie Cantor-Jacobson, M.D., Cincinnati, OH

Nicholas William Carosella, M.D., Pittsburgh, PA

Walker Grady Carter III, M.D., Macon, GA

Cletus Savio Carvalho, M.D., Lexington, KY

Darwyn Borja Chern, M.D., Scottsdale, AZ

Linda I-An Chuang, M.D., Ridgewood, NJ

Julia Anne Chung, M.D., Torrance, CA  
Sherry Tziporah Cohen, M.D., Toronto, ON  
Stephen Eliot Cummings, M.D., Half Moon Bay, CA  
Kristina Marie Curci, M.D., Blawnox, PA  
Avtar Singh Dhillon, M.D., Williamsburg, VA  
Lisa Rosemary Fazzolari, D.O., Oakland, CA  
Miriam Mindi Friedlander, M.D., Avon, CT  
Julie Lynne Fudge, M.D., Rochester, NY  
Joseph Lucien Georges, M.D., Baldwin, NY  
Rachel Lipson Glick, M.D., Ann Arbor, MI  
John-Paul Gomez, M.D., Bethlehem, PA  
Scott Moore Gordon, M.D., Chicago, IL  
James Lamont Griffith, M.D., Washington, DC  
Patty Jane Guedet, M.D., Brookfield, WI  
Huiwen Hao, M.D., Clovis, CA  
Raed Jad Hawa, M.D., Toronto, ON  
Stephen Solomon Hurwitz, M.D., Clovis, CA  
Glenn R. Kalash, D.O., Great Neck, NY  
Peter Stephen Kamp, M.D., Purvis, MS  
Edward M. Kantor, M.D., Charleston, SC  
Richard Ellis Kennedy, M.D., Trussville, AL  
Salma Samina Khan, M.D., San Francisco, CA  
Chul Soo Kwon, M.D., Ellicott City, MD  
Lauren Deidra LaPorta, M.D., Maywood, NJ  
Paula Xiaoping Lee, M.D., Fremont, CA  
Amani Boulos Michael, M.D., Canton, MA  
Sydney Sumi Moon, M.D., Providence, RI  
Helen Gertrude Muhlbauer, M.D., Bronx, NY  
Jay Anthony Nathanson, M.D., Toronto, ON

Mary Elizabeth Newman, M.D., Fairfax, VA  
Richard Alldin Oddy, M.D., MBChB, Fort Collins, CO  
Anil Madhukant Parikh, M.D. DFAPA, Akron, OH  
Dahlia Saad Pendergrass, M.D., Hartford, CT  
Thomas M. Penders, M.D., Washington, NC  
Pamela Jean Petersen-Crair, M.D., Guilford, CT  
William Anthony Rafuls, M.D., Johnson City, TN  
Michael Gregorio Rayel, M.D., Clarendville, NL  
Muhamad Aly Rifai, M.D., Easton, PA  
James Ray Rundell, M.D., Apo, AE  
Pamela Sue Sunday Saha, M.D., Brooklyn, NY  
Prema Venkatakishnan Sanne, M.D., Alpharetta, GA  
Ralph Jenks Seymour, M.D., Worcester, MA  
Jonathan Gershon Shack, M.D., Bala Cynwyd, PA  
Victor Gordon Stiebel, M.D., Pittsburgh, PA  
Craig Andrew Stuck, M.D., Columbia, SC  
Ruqiya Tareen, M.D., Kalamazoo, MI  
Rafael Arbues Torres, M.D., North Kingstown, RI  
Randy K. Ward, M.D., Excelsior, MN  
Robert Murray Weinrieb, M.D., Merion Station, PA  
Perry Scott Westerman, M.D., Kalamazoo, MI  
Beverly Kay Young, M.D., Eagle Point, OR
